# Supplementary material for: Accurate and Precise DNA Quantification in the Presence of Different Amplification Efficiencies Using an Improved Cy0 Method
Source: PLoS One. 2013 Jul 8;8(7):e68481. doi: 10.1371/journal.pone.0068481 (PMC3704541; doi:10.1371/journal.pone.0068481)
Supplement: Data File S1 — Word file that describes the algebra used in Cy0 correction. (DOC) [file pone.0068481.s001.doc]

**Mathematics of Cy0 correction**

Regarding the kinetic of PCR amplification we consider the logistic model as previously reported by Chervoneva and Rutledge (1-2).

Eq. 1

where *Fmax* is is the height of the amplification profile, *Emax* is the starting maximal efficiency value of curve growth rate and *y0* is the initial amount of DNA template.

The logistic model assumes that ; we can explicit ,and hence Xf can be obtained as follows:

Simplifying the equation, we can rewrite:

And then:

Finally:

Eq. 2

Then we calculate the slope in inflection point deriving versus x:

Eq. 3

Then substituting in *dy/dx* (Eq. 3) the *xf* value (Eq. 2) we obtained the slope in the inflection point (*m*):

Further simplifying:

then:

And :

Finally:

In order to calculate the starting DNA quantity (), the logistic function (Eq. 1) can be rewritten as follows:

In the inflection point, substituting :

that could be simplified in:

Eq. 4

If we consider the Eq. 4 for two different amplification reactions (A and B) showing the same starting DNA template (), but different initial amplification efficiencies (*Emax*); we can consider the following equivalence:

Then if we standardize for one flex ordinate (for example *yfA*), we can obtain:

The denominator values are usually higher than 1000 since, in most cases, (*Emax*+1)>1.7 and x*f*>10-12. Therefore it is possible to introduce the following approximation:

This approximation entails a maximal error <0.001. Then

applying logarithmic transformation, we obtain:

Eq. 5

but

Eq. 6

Substituting the Eq. 6 in the Eq. 5, we obtain:

And finally:

It is possible to consider *xf* proportional to *Cy0* value (*xf* α *Cy0*).
