# Supplementary material for: Accurate and Precise DNA Quantification in the Presence of Different Amplification Efficiencies Using an Improved Cy0 Method
Source: PLoS One. 2013 Jul 8;8(7):e68481. doi: 10.1371/journal.pone.0068481 (PMC3704541; doi:10.1371/journal.pone.0068481)
Supplement: Data File S2 — Fluorescence data and fitting elaborations of standard sample amplifications (standard curve) and amplifications obtained in the presence reverse blocked primer. (XLS) [file pone.0068481.s002.xls]

## Sheet: high eff calibration
	A1	A2	A3	A4	A5	A6	A7	A8	A9	A10	A11	A12	B1	B2	B3	B4	B5	B6	B7	B8	B9	B10	B11	B12	C1	C2	C3	C4	C5	C6	C7	C8	C9	C10	C11	C12
Input DNA	10000000	10000000	10000000	10000000	10000000	10000000	1000000	1000000	1000000	1000000	1000000	1000000	100000	100000	100000	100000	100000	100000	10000	10000	10000	10000	10000	10000	1000	1000	1000	1000	1000	1000	100	100	100	100	100	100
Cycle 1	-0.196301	-0.186033	-0.207764	-0.1886	-0.211134	-0.190408	-0.144185	-0.163518	-0.172077	-0.170716	-0.157846	-0.154556	-0.13471	-0.140944	-0.153105	-0.178927	-0.160826	-0.154165	-0.144383	-0.147632	-0.180136	-0.170328	-0.159304	-0.141768	-0.155054	-0.165126	-0.165105	-0.174328	-0.173753	-0.156633	-0.135706	-0.155649	-0.18213	-0.176622	-0.163497	-0.156309
2	-0.0514756	-0.0488209	-0.0604137	-0.0494846	-0.0450182	-0.0446088	-0.00918455	0.000658291	-0.00328803	-0.00342396	0.000744135	-0.00468789	-0.00449049	0.00323139	-0.00727362	-0.00318971	-0.000103344	-0.00982814	-0.0143727	-0.000107197	-0.0166315	-0.000127546	-0.00185471	-0.00194249	-0.00798961	-0.00509607	-0.0040978	0.00448411	0.00137941	0.00584659	-0.00611484	-0.00088261	0.00457608	-0.00668861	0.00674108	0.0016988
3	-0.0423046	-0.0359075	-0.0279205	-0.0375068	-0.0294719	-0.0367701	-0.00132463	-0.00674913	-0.00297006	-0.00308703	-0.0032706	-0.00440419	0.000202057	0.0118517	0.0089772	-0.00671784	0.00775684	-0.00577823	0.00844503	0.00399558	-0.00450913	-0.0038827	-0.00151152	-0.00618988	0.0054377	0.00350934	0.00815175	-0.0105469	-0.00205552	0.00990402	0.00168027	0.00323148	-0.0107886	0.0018408	0.00706698	0.00199597
4	-0.0206537	-0.0280072	-0.0203939	-0.0261688	-0.0337764	-0.0221485	-0.00177603	-0.00718389	-0.0153178	-0.0118137	-0.0166911	-0.00482509	-0.000273515	-0.0094228	-0.00347139	-0.0072175	-0.00404319	0.00868819	0.00423112	-0.000263433	0.00677682	-0.00438848	0.00657513	0.00245824	-0.00377568	-0.00110962	-0.00426751	0.000472059	-0.00254241	-0.00924217	-0.0025169	-0.00484195	0.000478243	-0.00275387	-0.00200632	-0.00300051
5	0.0327828	0.026894	0.0241352	0.0283662	0.0388351	0.0271676	0.00985765	0.00463435	0.012682	0.0173063	0.00952305	0.018326	0.0175593	-0.00498449	0.00479288	0.0161931	0.00377618	0.00524726	0.00827402	0.00765239	0.0110215	0.00410592	0.00689806	0.00730483	0.0140066	0.0074864	0.00399509	0.00463185	0.0090531	0.00225748	0.0127636	-0.000746477	0.0047379	0.00984214	-0.00169318	0.00640761
6	0.0816511	0.0858416	0.0845929	0.084794	0.0694314	0.0763598	0.00242755	0.00864038	0.00889387	0.00101838	0.00969454	-0.00440885	-0.0129973	-0.000675766	-0.00302507	0.000931941	-0.00738649	0.00167091	-0.00657749	-0.0112773	0.00334231	0.00429281	-0.010107	-0.00163071	-0.007679	-0.00479005	-0.00378152	0.000958893	-0.00583458	-0.00876592	-0.00581215	0.00323956	0.000996341	-0.00224046	-0.0101086	-0.00710187
7	0.209837	0.224187	0.221027	0.220599	0.202406	0.204384	0.0249421	0.0277096	0.0245428	0.0337566	0.031125	0.0137442	-5.31985e-05	-0.00507204	0.0126664	0.000688501	-0.0151632	0.00892544	-0.00676355	0.00764977	0.0031587	0.00410148	0.0111872	0.00274801	0.00523851	-0.00499118	-0.00399808	0.0199636	0.00524922	0.0059631	0.00526779	0.00307687	0.000813895	0.0016627	0.0026028	0.0109602
8	0.44804	0.462601	0.473315	0.458961	0.441233	0.437365	0.0507489	0.0463294	0.0476209	0.0454084	0.0348172	0.0360469	-0.000788995	0.00249009	0.00788027	0.00760259	0.00293931	-0.00304566	-0.00364404	-0.00821	-0.00143754	-0.00474658	-0.00667333	0.00669156	0.00455729	-0.00154767	-0.00472134	-0.0114952	-0.00672985	0.00526861	0.00839396	-0.0127692	-0.00771409	0.000996153	-0.0195182	-0.0033
9	0.934761	0.966131	0.975398	0.958289	0.916562	0.900948	0.0997776	0.0924384	0.0910895	0.10296	0.0866186	0.0817738	-0.00098772	0.0105538	0.0235449	0.0188912	0.0139965	0.0154433	0.00753702	0.0108301	0.0181586	0.0115651	0.00618187	0.00211804	0.000105214	0.00249273	-0.00483265	-0.00392344	0.00821515	0.00145232	0.000858465	0.00245736	0.00796104	-0.0072029	-0.0152268	-0.00785678
10	1.86938	1.92387	1.92035	1.91025	1.83781	1.77631	0.179446	0.173632	0.186499	0.20219	0.173465	0.155401	0.0210453	-0.00191681	0.0196029	0.0227637	0.0177914	0.0230574	0.00412577	0.00360675	0.00684357	0.00384688	0.023839	-0.00656175	-0.00391614	-0.00131279	-0.00447635	0.000268326	-0.00273778	0.0055573	-0.00246704	0.00671946	-0.0111613	0.00965116	-0.0104723	-0.0165343
11	3.64909	3.75016	3.74491	3.72489	3.61083	3.47328	0.341811	0.33911	0.360671	0.379224	0.324786	0.315668	0.0336304	0.0389237	0.0506856	0.0527958	0.032131	0.0486902	0.00028301	-0.00396147	0.0147867	-0.000148955	0.0024535	-0.00191311	-0.00400699	0.0109645	0.0112394	0.00394984	0.00464304	0.00920521	0.0126009	-0.00460034	-0.00315975	-0.00655659	-0.0146208	-0.0164033
12	6.99461	7.16618	7.15951	7.12329	6.84345	6.63964	0.677426	0.654133	0.724271	0.724437	0.661445	0.617381	0.0628048	0.0620208	0.0726773	0.0778338	0.0793445	0.0733793	0.00718338	0.0033589	0.0144381	-0.00458264	0.00211744	-0.00674823	0.00851182	0.00197092	0.0144893	0.00323133	0.00771641	0.00862163	0.00481329	-0.00480057	0.012317	0.00138809	-0.0105476	-0.00292979
13	12.8824	13.2283	13.1875	13.1418	12.6835	12.2318	1.31922	1.3156	1.40069	1.45261	1.3181	1.20766	0.135127	0.121565	0.133508	0.140388	0.136903	0.131043	0.0215217	0.00699406	0.0181966	0.0115913	0.019142	0.0113697	0.00790814	0.00949998	0.00179763	-0.00136243	-0.00805303	0.00806287	0.000965093	-0.00855019	0.000623069	-0.0148872	-0.0190796	-0.0165333
14	22.4742	23.0548	23.06	22.9097	22.144	21.4314	2.52731	2.54583	2.70565	2.77273	2.55759	2.31465	0.254005	0.266396	0.275801	0.27006	0.267816	0.269267	0.0313362	0.0254503	0.0332534	0.0395489	0.0313997	0.0200033	0.0153527	0.0161857	0.00411168	0.0123726	0.00168012	0.0142842	0.0042672	0.0141499	-0.00349768	0.00535204	-0.00209225	0.00153961
15	35.7965	36.836	36.8634	36.5761	35.3225	34.123	4.81947	4.85156	5.17238	5.33401	4.90563	4.41696	0.495165	0.501775	0.536615	0.518174	0.507209	0.519156	0.0486448	0.0326763	0.0525378	0.0555261	0.0482914	0.0426766	0.0185022	0.00204367	0.0143023	-0.00469949	-0.00369976	0.0168705	0.00808538	-0.00444752	0.00100199	-0.00227805	-0.0187893	-0.00707149
16	50.4832	52.1007	51.9804	51.6964	49.9114	48.2699	9.04083	9.11024	9.65944	9.92241	9.18923	8.32816	1.00067	0.995797	1.04873	1.01701	1.00338	0.993607	0.0818327	0.0828956	0.0922965	0.097007	0.105058	0.0900163	0.0100325	0.0137888	0.00927529	0.00955482	0.0141247	0.00530092	0.00586689	0.00538225	0.0110062	-0.0122313	-0.0204958	-0.0176988
17	62.7075	64.7136	64.4878	64.2121	62.1063	60.129	16.2346	16.3535	17.3551	17.9012	16.5789	14.9933	1.921	1.92101	2.01758	1.9885	1.93961	1.93381	0.171486	0.170969	0.202549	0.170927	0.17456	0.160224	0.015205	0.00508887	0.0244235	0.00487666	0.0171478	0.0239885	0.000610718	-0.00684174	0.00234785	-0.000823856	-0.00848287	-0.0138215
18	70.9276	73.14	72.7108	72.5869	70.1388	67.9177	27.2351	27.4208	29.1346	29.9873	27.7757	25.1088	3.71222	3.7516	3.91706	3.83731	3.76103	3.75463	0.342713	0.337612	0.362236	0.369963	0.349948	0.338627	0.0159902	0.0252505	0.0313949	0.0114713	0.019883	0.0274657	-0.00497555	-0.0117979	-0.00270443	-0.0102096	-0.0226378	-0.0375553
19	75.8188	78.279	77.7247	77.664	75.0409	72.5853	40.8277	41.1325	43.7205	45.0209	41.7341	37.6637	7.10476	7.16714	7.45282	7.32308	7.15847	7.12624	0.683802	0.653991	0.719098	0.725186	0.715512	0.650979	0.0545246	0.0437395	0.0723825	0.0509348	0.0547934	0.062725	-0.00513174	-0.00368166	0.00162722	-0.00564721	-0.0219375	-0.0222755
20	78.8266	81.4131	80.6925	80.7665	78.2162	75.4688	53.8986	54.1368	57.6744	59.4671	55.0163	49.517	13.063	13.228	13.6965	13.4519	13.2072	13.1264	1.33358	1.28864	1.41937	1.42138	1.39208	1.29269	0.128723	0.120847	0.1259	0.114073	0.112814	0.131986	0.00222553	0.00431169	-0.00191552	-0.00115823	-0.0170562	-0.0160523
21	80.652	83.3858	82.6201	82.7024	80.094	77.3626	63.4482	63.6253	67.7623	69.8886	64.6872	58.1376	22.7005	23.0061	23.8286	23.4851	22.9345	22.8079	2.57197	2.5231	2.74877	2.79275	2.71358	2.52655	0.240692	0.23343	0.256961	0.225323	0.240573	0.244301	0.00428683	-0.004454	0.0164476	0.0057679	-0.00514767	-0.0110801
22	81.9915	84.7029	83.9557	84.025	81.3463	78.4871	69.4496	69.4743	74.0943	76.3754	70.5951	63.5343	36.0378	36.5912	37.9149	37.2704	36.4857	36.2395	4.95719	4.84093	5.32281	5.35315	5.2374	4.87968	0.490851	0.489182	0.513075	0.472895	0.47923	0.489196	0.0201941	0.0315661	0.0259184	0.0239973	0.00156523	0.0114026
23	82.9305	85.6072	84.8099	84.9381	82.3307	79.5073	73.0955	72.9601	77.8866	80.4632	74.2788	66.814	50.5183	51.5201	53.2023	52.3762	51.2238	50.9786	9.30686	9.12566	10.0356	10.086	9.86334	9.20951	1.0003	0.970109	1.0286	0.983112	0.986341	0.996576	0.0668363	0.0836186	0.0912597	0.0839642	0.0650073	0.0666578
24	83.4733	86.1336	85.426	85.4685	82.8683	80.0136	75.2587	75.0468	80.2667	82.8439	76.3678	68.7156	62.3042	63.7479	65.8313	64.6828	63.1954	63.0897	16.6772	16.4003	18.0379	18.0786	17.7477	16.5789	1.97339	1.92426	2.02116	1.93582	1.93059	1.93333	0.146158	0.176204	0.170768	0.179255	0.161414	0.120703
25	83.8818	86.5074	85.6626	85.851	83.2141	80.4123	76.8125	76.5175	81.8228	84.6435	77.8562	69.9781	70.0556	71.8586	74.0132	72.7254	70.9326	70.949	27.8493	27.4623	30.292	30.3653	29.7582	27.7663	3.83495	3.75061	3.91651	3.77764	3.77566	3.75173	0.299434	0.36261	0.354578	0.399498	0.367866	0.291905
26	84.056	86.7499	85.9498	86.0764	83.512	80.5638	77.7425	77.5504	82.8287	85.7187	78.881	70.8632	74.7385	76.538	78.913	77.4459	75.6141	75.7064	41.7465	41.1604	45.4431	45.5528	44.7924	41.6549	7.31636	7.13846	7.44984	7.19318	7.1956	7.1504	0.601097	0.7342	0.713385	0.78562	0.740185	0.584676
27	84.1732	86.8445	86.0122	86.1767	83.7501	80.6251	78.4025	78.0698	83.4382	86.2211	79.3218	71.2943	77.4915	79.4227	81.8498	80.3179	78.3991	78.5282	54.7003	53.9484	59.6743	59.7211	58.7287	54.5191	13.4746	13.1481	13.8273	13.2614	13.2774	13.1633	1.1884	1.40087	1.36431	1.54129	1.47516	1.175
28	84.283	86.9972	86.1229	86.3186	83.7377	80.7773	78.8549	78.4973	84.0531	86.8357	79.8684	71.7374	79.2701	81.3223	83.7338	82.1099	80.323	80.3481	64.0341	63.3078	69.9534	70.2051	69.0105	64.1625	23.3895	22.9281	24.0183	23.0316	23.1539	22.9555	2.31703	2.74923	2.68178	3.01947	2.92219	2.33721
29	84.3788	86.9751	86.2627	86.326	83.6571	80.7496	79.0869	78.6939	84.1566	87.0299	80.0239	71.8972	80.4209	82.4665	84.9605	83.3236	81.3187	81.5146	69.7804	68.9023	76.2546	76.378	75.1409	69.7948	37.0825	36.4696	38.3548	36.5907	36.9028	36.462	4.48375	5.31903	5.15883	5.78686	5.62568	4.52577
30	84.3287	86.9887	86.0816	86.3237	83.9228	80.7342	79.2416	78.8898	84.456	87.2632	80.1771	72.1002	81.1778	83.2264	85.7614	84.0169	82.1748	82.2248	73.1352	72.2189	79.9889	80.1996	79.0128	73.2193	51.6548	51.1636	53.9045	51.2321	51.7111	51.1123	8.41712	9.92608	9.70227	10.8159	10.4449	8.55717
31	84.2521	86.8872	86.0408	86.2284	83.6789	80.6319	79.2405	78.9229	84.4626	87.2659	80.2784	72.0738	81.6672	83.6979	86.2725	84.5345	82.5268	82.7385	75.1531	74.1751	82.215	82.4955	81.2021	75.3626	63.5612	63.1476	66.6584	63.1098	63.8811	63.1374	15.2066	17.6437	17.4407	19.1839	18.5465	15.389
32	84.2597	86.9034	86.0282	86.2425	83.7851	80.7861	79.4137	78.9101	84.521	87.343	80.2331	72.144	81.9959	84.1257	86.6584	84.9424	83.0167	83.0778	76.4909	75.5955	83.7481	84.0991	82.6768	76.74	71.3184	71.2135	75.0572	70.8611	71.9125	70.9217	25.7916	29.2889	29.3964	31.7385	30.5553	25.9487
33	84.16	86.8016	85.9231	86.1412	83.7546	80.6271	79.4392	78.9164	84.536	87.4408	80.6667	72.1063	82.0925	84.2552	86.7992	85.125	83.1049	83.2878	77.3924	76.4266	84.6635	85.0636	83.6514	77.5863	75.8415	75.8644	80.0599	75.5485	76.4844	75.6281	39.2882	43.319	44.4132	46.5967	44.6716	39.0885
34	84.0429	86.7624	85.7872	86.0825	83.7237	80.4546	79.3425	78.8921	84.4696	87.2897	80.1771	72.0529	82.1471	84.3074	86.9173	85.146	83.1445	83.288	77.9409	76.931	85.2618	85.6557	84.3077	78.1394	78.6302	78.4901	83.0304	78.2821	79.3521	78.2522	52.7217	56.1838	58.7446	60.0628	57.169	51.5117
35	84.0606	86.6783	85.7749	86.0239	83.6815	80.628	79.3309	78.8342	84.4338	87.1827	79.6282	71.934	82.3043	84.3688	86.984	85.3105	83.2038	83.4507	78.2558	77.3192	85.6612	86.0433	84.6512	78.4863	80.2897	80.3956	84.831	80.163	81.0435	79.9943	62.5476	65.1709	69.3542	69.3964	65.8779	60.4734
36	84.0948	86.7241	85.6902	86.0668	83.6357	80.5184	79.323	78.8798	84.4493	87.203	79.3587	72.0275	82.2938	84.3885	86.9595	85.1789	83.2599	83.4534	78.4931	77.4606	85.984	86.318	84.9011	78.8372	81.3934	81.5587	86.0248	81.3066	82.2803	81.1445	68.6824	70.6214	75.7409	75.0727	71.1748	66.1807
37	83.9299	86.5641	85.6617	85.9056	83.6015	80.3712	79.2963	78.6831	84.3185	87.0876	79.1283	71.8739	82.1959	84.242	86.9631	85.244	83.1577	83.3932	78.5965	77.6188	86.1002	86.4265	85.0492	78.8978	82.1173	82.2539	86.7546	82.1087	83.0585	81.837	72.278	73.7102	79.5151	78.3846	74.119	69.3202
38	83.9113	86.6327	85.7103	85.9524	83.5516	80.3643	79.2177	78.6961	84.3033	87.1665	79.0201	71.8634	82.1512	84.2269	86.903	85.1546	83.2101	83.2091	78.6679	77.6193	86.15	86.512	85.0677	78.9664	82.693	82.7862	87.2184	82.6004	83.4753	82.3283	74.3592	75.6669	81.8353	80.4989	76.0693	71.3044
39	83.816	86.6655	85.5811	85.9531	83.4755	80.3413	79.1376	78.6414	84.1644	87.0426	78.9526	71.84	82.1311	84.184	86.8471	85.1622	83.1535	83.2354	78.6405	77.652	86.1062	86.5191	84.9625	78.8712	82.9789	83.0498	87.5397	82.9456	83.8627	82.6225	75.7814	76.9036	83.2667	81.7882	77.1525	72.4196
40	83.8635	86.5517	85.4843	85.8796	83.3499	80.1602	79.0693	78.4871	84.0377	86.8944	78.679	71.6361	82.0596	84.0835	86.8033	84.9811	83.014	83.1682	78.5986	77.5405	86.0627	86.404	85.0431	78.8508	83.0126	83.3143	87.7103	83.1528	84.0733	82.8946	76.6199	77.6765	84.0826	82.7231	77.9669	73.2733
41	83.8037	86.4584	85.4717	85.7947	83.422	80.1523	79.027	78.4976	84.0531	86.9556	78.6977	71.7087	82.0703	84.0408	86.6518	84.981	83.0027	83.1498	78.5378	77.5087	85.98	86.3951	84.994	78.8423	83.1282	83.2672	87.7501	83.2524	84.0848	82.8871	77.1998	78.1059	84.6356	83.1916	78.4149	73.7968
42	83.6431	86.395	85.3225	85.707	83.3039	80.1899	78.9963	78.5125	84.0252	86.9018	78.6834	71.6283	81.9375	84.0069	86.6279	84.9771	82.8405	83.1125	78.5298	77.5461	86.0388	86.366	84.9629	78.8859	83.0309	83.2665	87.8136	83.2984	84.0961	82.9467	77.5777	78.4789	85.0789	83.62	78.77	74.0585
43	83.6278	86.3204	85.2826	85.6473	83.3151	80.1601	78.963	78.4982	84.0257	86.96	78.5781	71.6793	81.848	83.8335	86.5802	84.8689	82.7951	83.015	78.5342	77.4631	85.9837	86.2683	84.9817	78.9442	83.068	83.3092	87.8172	83.4405	84.1446	82.9686	77.7544	78.6777	85.3772	83.7761	78.8971	74.2634
44	83.5582	86.3252	85.1178	85.6334	83.1818	80.002	78.812	78.3373	83.8994	86.767	78.4545	71.3937	81.8054	83.8634	86.5006	84.8534	82.6971	82.9851	78.4933	77.3607	85.8069	86.2115	84.8022	78.6912	82.9904	83.26	87.7138	83.3713	84.0653	82.8938	77.7885	78.6971	85.487	83.9523	78.9199	74.2521
45	83.4661	86.2019	85.0688	85.518	83.0903	79.975	78.8337	78.3434	83.871	86.7126	78.502	71.4179	81.692	83.7825	86.401	84.7302	82.8104	82.8135	78.3497	77.2674	85.8305	86.1902	84.761	78.599	82.9696	83.1336	87.6546	83.2329	84.0244	82.8419	77.8773	78.7415	85.5065	83.9507	79.0662	74.3226
46	83.4613	86.2433	85.0181	85.5478	83.0941	79.9351	78.8023	78.2549	83.7699	86.6572	78.3525	71.3356	81.5608	83.7497	86.3774	84.645	82.5877	82.8989	78.1719	77.2181	85.6932	86.0942	84.5436	78.5442	82.8378	83.072	87.5666	83.2601	83.963	82.688	77.7899	78.6491	85.4163	83.9214	78.8693	74.284
47	83.3655	86.1521	85.0367	85.4555	83.094	79.8886	78.7093	78.1518	83.4757	86.5773	78.3437	71.3062	81.6539	83.5961	86.2218	84.6568	82.5539	82.7239	78.1475	77.1995	85.6854	86.0803	84.5472	78.5373	82.857	83.1218	87.5512	83.1022	83.9828	82.6625	77.7951	78.6999	85.4318	83.8981	78.7752	74.2337
48	83.3087	86.1969	84.8991	85.4749	83.0178	79.9106	78.7461	78.1116	83.657	86.4736	78.1924	71.2114	81.536	83.6108	86.2336	84.5104	82.4446	82.6944	78.154	77.068	85.6501	85.9036	84.5448	78.4997	82.8142	83.0617	87.4957	83.2327	83.8515	82.5322	77.7115	78.6376	85.3806	83.8638	78.8312	74.1766
49	83.2795	85.8887	84.7034	85.2364	82.9416	79.8326	78.6345	78.0144	83.5476	86.5163	78.2084	71.22	81.4987	83.5685	86.1544	84.4872	82.4296	82.5669	78.017	77.0787	85.5795	85.8684	84.4846	78.4501	82.6758	82.9241	87.4279	83.1177	83.7492	82.5019	77.6497	78.5558	85.3533	83.7885	78.7563	74.1699
50	83.2131	85.9602	84.5988	85.2734	82.8236	79.7044	78.6119	77.9067	83.5239	86.4835	78.1134	71.156	81.4155	83.4521	86.0629	84.414	82.3579	82.5445	77.9607	76.9948	85.5128	85.8481	84.3815	78.4092	82.5928	82.8289	87.2652	83.0831	83.7906	82.4384	77.6684	78.4566	85.259	83.7068	78.7434	74.0879
Fmax	83.7136	86.4054	85.4257	85.7325	83.2704	80.1885	78.9014	78.4183	83.946	86.8045	79.1066	71.6073	81.7918	83.8582	86.4642	84.7637	82.7492	82.9192	78.2642	77.2564	85.7212	86.0822	84.6626	78.582	82.7717	82.9808	87.4543	83.0143	83.7984	82.5693	77.5799	78.4586	85.1775	83.6408	78.706	74.0836
B	1.61696	1.60999	1.57935	1.61168	1.65377	1.61146	1.61826	1.57691	1.59867	1.61165	1.47979	1.55991	1.56286	1.55255	1.5653	1.55881	1.55793	1.55907	1.54402	1.53751	1.55726	1.56606	1.5594	1.56563	1.54708	1.55749	1.53784	1.6075	1.56567	1.54984	1.51859	1.5135	1.52572	1.5559	1.51897	1.51542
C	14.7548	14.7772	14.8329	14.7718	14.6391	14.7711	18.2515	18.3316	18.2877	18.2612	18.6303	18.3827	21.8448	21.8945	21.8436	21.842	21.842	21.8754	25.3801	25.3934	25.3384	25.3295	25.3486	25.3222	28.8435	28.8595	28.9207	28.6852	28.8143	28.8624	32.5989	32.3636	32.4988	32.2076	32.2636	32.4843
D	1.35685	1.34824	1.29995	1.35031	1.4378	1.35285	1.35475	1.28868	1.32474	1.34626	1.11658	1.25628	1.26187	1.24577	1.26951	1.26474	1.26189	1.25433	1.23452	1.22908	1.26838	1.27646	1.26811	1.27801	1.23961	1.25645	1.22534	1.35203	1.28002	1.24743	1.19213	1.18426	1.2043	1.25365	1.19244	1.19449
Fb	0.088864	0.0963578	0.0850531	0.0944765	0.105713	0.0896225	0.0964694	0.0824772	0.0955105	0.10306	0.0429463	0.0673892	0.0638037	0.0614854	0.0749819	0.0714347	0.0671219	0.0682756	0.04959	0.0457916	0.0591131	0.0571204	0.0572726	0.0498314	0.0405019	0.0412889	0.0434624	0.0476846	0.0436689	0.0461877	0.0307851	0.0272347	0.0335575	0.0326416	0.01542	0.015746
x flex	15.2483	15.2582	15.2472	15.2558	15.2396	15.2581	18.7428	18.7316	18.7372	18.7404	18.7935	18.7386	22.2083	22.2357	22.2171	22.2081	22.2044	22.2287	25.7054	25.7105	25.7086	25.7118	25.719	25.7063	29.1758	29.215	29.2333	29.1701	29.2009	29.205	32.8657	32.6196	32.7824	32.5593	32.5309	32.7536
y flex	39.6641	40.9893	40.7736	40.6581	39.0823	38.0178	37.4068	37.4909	39.9466	41.1954	38.7766	34.3818	39.2276	40.3071	41.4315	40.6418	39.6892	39.8145	37.6718	37.2131	41.0667	41.191	40.5601	37.5916	39.8001	39.805	42.14	39.3166	40.0664	39.6638	37.5609	38.0284	41.163	40.1286	38.0885	35.8416
slope (m)	14.0904	14.5831	14.5614	14.4599	13.9004	13.5331	13.2646	13.3574	14.2049	14.63	13.8084	12.2482	13.9802	14.3796	14.7792	14.5344	14.1886	14.1848	13.4619	13.329	14.7244	14.7278	14.5218	13.4525	14.2246	14.2162	15.0729	14.0424	14.3511	14.1884	13.4399	13.6131	14.7279	14.3354	13.6326	12.8681
Cy0	12.4396	12.4541	12.4529	12.4506	12.4356	12.4555	15.93	15.931	15.9318	15.9316	15.9884	15.937	19.4069	19.4369	19.4188	19.4168	19.4119	19.4267	22.9106	22.9221	22.9236	22.9188	22.9299	22.9156	26.3807	26.418	26.4404	26.3736	26.412	26.4128	30.0733	29.8281	29.9898	29.7623	29.7382	29.9695
Cy0 corrected	12.3906	12.4697	12.5082	12.4502	12.3808	12.3722	15.7535	15.8326	15.8915	15.9139	15.9288	15.7153	19.3706	19.4585	19.4769	19.4974	19.4522	19.405	22.8736	22.9215	23.0846	23.0199	23.0403	22.9085	26.4283	26.4468	26.589	26.3864	26.5268	26.4788	30.0792	29.8637	30.1219	29.8116	29.7713	30.0109
m calibration curve	14.045
y flex calibration curve	39.3442

## Sheet: low eff calibration
	D1	D2	D3	D4	D5	D6	D7	D8	D9	D10	D11	D12	E1	E2	E3	E4	E5	E6	E7	E8	E9	E10	E11	E12	F1	F2	F3	F4	F5	F6	F7	F8	F9	F10	F11	F12
Input DNA	10000000	10000000	10000000	10000000	10000000	10000000	1000000	1000000	1000000	1000000	1000000	1000000	100000	100000	100000	100000	100000	100000	10000	10000	10000	10000	10000	10000	1000	1000	1000	1000	1000	1000	100	100	100	100	100	100
Cycle 1	-0.453844	-0.502619	-0.567469	-0.62791	-0.615216	-0.572772	-0.446923	-0.517471	-0.616317	-0.574634	-0.55536	-0.589011	-0.496353	-0.454369	-0.537591	-0.660897	-0.58363	-0.579446	-0.503077	-0.555025	-0.613858	-0.60991	-0.584028	-0.571435	-0.421207	-0.402662	-0.449025	-0.532107	-0.527018	-0.444845	-0.401531	-0.454488	-0.542811	-0.527693	-0.502986	-0.530595
2	-0.0094453	-0.0184164	-0.0137603	-0.00464917	-0.0235584	-0.00922392	-0.00346629	0.00125486	0.00221867	-0.00798055	-0.0137791	-0.00306502	0.0236996	0.0130685	0.0063367	0.0226378	0.00980027	0.000158574	0.0175132	-0.000723036	-0.00780604	-0.0102124	0.00254114	0.021371	0.0116904	0.018595	0.00133337	-0.00575748	0.00414986	0.000267053	0.00718323	0.00629317	-0.00175109	0.00351343	-0.0119108	0.00755157
3	-0.00326042	-0.0124981	-0.00294638	-0.0232042	-0.00373269	-0.0272729	0.00667848	0.011608	0.00799251	-0.00201729	0.00874063	0.0150218	0.0133539	0.013739	0.0121746	0.00397746	0.00101014	0.0200806	-0.00571024	-0.0048365	0.00808902	0.0010953	0.00334142	0.010534	0.0100974	0.00858838	0.012361	0.0199712	0.00492706	0.0107181	0.012736	0.00700009	0.00926177	0.00430698	0.0112347	0.0202081
4	-0.0197551	-0.00725018	-0.0179559	0.00103733	-0.0132394	-0.0037093	-0.00752921	-0.00284396	-0.00193582	-0.00201442	-0.0129874	0.00351699	-0.0254569	-0.012587	-0.00801728	-0.0204978	-0.00377725	-0.00852097	-0.00570137	0.0146869	0.00306192	0.00109959	-0.00214107	-0.0185982	0.00164869	-0.00208655	0.00725155	-0.0099053	0.014727	0.00587664	0.0078579	-0.00294455	0.0143853	0.00964416	0.00564867	0.0142931
5	0.0132437	0.0136168	0.00204267	-0.00382929	0.00574854	0.010412	0.00193057	0.00197832	-0.0168195	-0.0071774	0.00332221	-0.0137646	0.00781336	0.00847219	0.00712494	0.00397918	-0.00378783	-0.00375619	-0.000903973	-0.00482877	0.00810189	0.00111017	-0.0131384	-0.00692263	-0.00773511	-0.00744375	-0.00817215	0.010022	-0.00483136	-0.00382457	-0.0116747	0.00701125	-0.000975495	-0.00634021	-0.00553458	-0.0212828
6	0.0192171	0.0245479	0.0326199	0.0306454	0.0347819	0.0297941	0.00238646	-0.0119972	0.0085441	0.0191897	0.0147036	-0.0017091	-0.01941	-0.0226926	-0.017619	-0.0100966	-0.00324533	-0.00796203	-0.00519763	-0.0042986	-0.0114468	0.0069073	0.00939689	-0.00638426	-0.0157014	-0.0176531	-0.0127738	-0.0143305	-0.0189725	-0.0130372	-0.0161024	-0.01736	-0.0209205	-0.0111244	0.000561962	-0.0207699
7	0.0859502	0.0670227	0.0784534	0.0653786	0.0830912	0.0777187	-0.0111676	-0.00164014	0.00439689	0.0148469	0.0209433	0.0163864	-0.0131579	-0.0168045	0.0134586	-0.00430934	-0.0120698	-0.0166754	-0.00446586	-0.0035515	0.00948714	-0.0131734	-0.000787109	0.00026447	0.00490224	-0.000932893	0.0136549	0.00640697	0.0111498	-0.00745072	0.00408412	0.0131761	0.000341162	-0.0103103	-0.00428539	0.00375686
8	0.141691	0.151326	0.169368	0.153456	0.164653	0.153927	0.00367582	-0.000931531	0.0101834	0.000139305	0.0217431	0.011435	-0.00688352	-0.00561609	-0.011065	-0.0181038	-0.00167047	-0.00632723	0.0106493	0.00209872	0.00528688	0.00862966	2.25845e-05	0.0127633	-0.020433	-0.0162791	-0.0266639	-0.0376064	-0.0271913	-0.00669813	-0.00990279	-0.00101743	-0.00398581	-0.0041649	-0.00351954	-0.00730246
9	0.289812	0.286606	0.328911	0.341853	0.325474	0.313551	0.0173904	0.0275029	0.0294911	0.00476453	0.0266498	0.0224291	-0.00743388	-0.0166788	-0.0217823	-0.0237114	-0.0119056	-0.0164873	-0.00425228	0.00646268	-0.0103614	0.0132965	-0.011525	-0.0169527	-0.00832776	-0.00603566	-0.0117659	-0.0132302	-0.0228191	-0.0120481	-0.0103433	0.00347687	-0.00963891	-0.0100455	-0.00402615	0.00404094
10	0.556208	0.539535	0.636749	0.635223	0.593934	0.594096	0.0238487	0.0390923	0.0366552	0.0638503	0.0505316	0.0419046	-0.0277812	-0.00975864	-0.019853	-0.0214038	-0.000265486	-0.0143516	-0.0118982	0.00363335	-0.00311808	-0.0210954	-0.00935603	-0.0147608	-0.0169452	-0.0148991	-0.0200144	-0.0110447	-0.00116422	-0.00520376	-0.0281253	0.000425492	-0.00240067	-0.00785875	-0.00198805	0.000248132
11	1.04604	1.03568	1.15209	1.14392	1.08285	1.07932	0.0850706	0.0822164	0.100926	0.110085	0.104616	0.09927	-0.0115589	-0.0207994	-0.000147695	0.0123415	0.00881887	-0.00529381	-0.00743283	0.00822276	0.011659	-0.000466633	0.00685014	0.00244039	-0.00254652	-0.00442964	0.000278173	-0.00136851	-0.0112284	-0.0200581	0.00586172	0.0101133	-0.00268617	0.00252551	0.00334056	-3.83952e-05
12	1.8839	1.83074	2.01915	1.99323	1.94353	1.94291	0.151622	0.159877	0.156125	0.172722	0.17043	0.192104	-0.0225056	-0.0207591	-0.00510427	-0.00707571	0.00413365	-0.00984938	-0.0262314	-0.0205786	-0.0280416	-0.0260831	-0.036665	-0.0320311	-0.0116985	-0.0200318	0.000801605	-0.0157733	-0.0155913	-0.0146818	-0.0132209	-0.0142598	-0.0175036	-0.0235837	-0.024142	-0.0350999
13	3.37759	3.26899	3.63275	3.56057	3.4745	3.43868	0.274835	0.3195	0.320579	0.364654	0.355859	0.377182	0.0107031	0.0264194	0.0199134	0.0270749	0.0231232	0.0234928	0.00282547	0.0140302	-0.00747005	-0.00466834	-0.00318494	-0.0199004	-0.00982233	-0.00351299	-0.0192864	-0.0202352	-0.0199924	0.000381071	-0.0128136	0.00610791	-0.00674932	-0.0123877	-0.0180561	-0.0227096
14	5.78748	5.61827	6.29893	6.15186	5.98018	5.94901	0.543139	0.593189	0.592445	0.632291	0.653679	0.664166	0.0420574	0.0348431	0.0327284	0.0441204	0.0351585	0.0451738	-0.00332636	-0.0115487	-0.0137236	-0.0268853	-0.0429533	-0.0152636	-0.0233905	-0.0151547	-0.0357441	-0.00138856	-0.0112594	-0.0200818	0.000972279	-0.00978038	-0.0231704	-0.0241297	-0.0302624	-0.0415802
15	9.72709	9.46648	10.5229	10.3247	10.0021	9.97827	0.956255	1.03898	1.07663	1.14675	1.189	1.2375	0.0644426	0.0660972	0.0729787	0.0736418	0.0831354	0.0837059	-0.0117837	-0.00509194	-0.0120335	-0.0251616	-0.0137911	-0.0252551	-0.0217536	-0.0135852	-0.034006	-0.0194482	-0.0339488	-0.00863553	-0.0219401	-0.0130967	-0.0264756	-0.0222408	-0.0285112	-0.0397321
16	15.3657	15.0313	16.7118	16.3416	15.9119	15.8196	1.75602	1.87382	1.93155	2.07842	2.15222	2.24734	0.134646	0.126765	0.166348	0.178805	0.166965	0.167485	-0.00287363	-0.000368102	-0.00716707	-0.00437532	-0.00850191	-0.0195509	-0.0186247	-0.0187773	-0.0183958	-0.0192657	-0.0288638	-0.0230403	-0.0413124	-0.0228319	-0.0210988	-0.0326693	-0.0338798	-0.0454211
17	22.3369	22.0807	24.6	24.1743	23.5911	23.3791	3.12162	3.37189	3.44482	3.68529	3.85249	4.0502	0.283176	0.27741	0.320775	0.343303	0.308811	0.328156	0.0209734	0.0343708	0.018605	0.0224454	0.0195379	0.0219766	-0.0207921	-0.0231411	-0.0172686	-0.018035	-0.017893	-0.0121969	-0.0011357	0.00320529	-0.0147183	-0.01534	-0.0214435	-0.0381892
18	29.8589	29.725	33.14	32.7539	31.9642	31.7072	5.48702	5.90163	6.03038	6.47613	6.78695	7.08689	0.584345	0.5255	0.623758	0.675654	0.61075	0.628507	0.0466149	0.0610978	0.0762613	0.0772097	0.0882761	0.0777074	-0.00848125	-0.00845355	-0.00852281	-0.0146828	-0.014563	0.00580263	-0.0121557	0.0168635	0.0146495	0.00456952	-0.00596317	-0.00986775
19	36.5081	36.5732	40.8994	40.5004	39.6732	39.2437	9.1884	9.89682	10.0758	10.8389	11.2543	11.8528	1.0765	0.970814	1.10605	1.19687	1.088	1.14105	0.102019	0.117993	0.114734	0.106761	0.113816	0.12278	-0.00781419	-0.0140547	0.00154653	-0.00988561	-0.00984528	-0.00893056	0.0123317	0.0119776	-0.0057319	-0.000580932	-0.011395	-0.0215509
20	41.9905	42.3028	47.3191	47.0171	46.1676	45.6735	14.6343	15.705	16.1127	17.2237	17.8859	18.7811	1.97318	1.81637	1.99217	2.14349	1.96324	2.02929	0.18927	0.216838	0.196318	0.202178	0.214231	0.194965	-0.0041532	-0.0102732	0.00502673	-0.0115753	-0.0163666	0.0139421	-0.00339585	0.00600401	-0.00677966	-0.00160109	0.00450305	-0.0224845
21	46.4755	47.0369	52.5926	52.3285	51.4908	50.8033	21.4823	23.0322	23.7394	25.1919	26.0021	27.1215	3.50418	3.19551	3.55805	3.83326	3.52324	3.61184	0.351135	0.386705	0.361251	0.37392	0.383582	0.392828	-0.00361002	-0.00980118	0.00567672	0.0192658	0.0285607	0.024626	-0.00209995	0.0226033	0.0156467	-0.0155406	-0.0159754	-0.0262885
22	50.0657	50.8037	56.6963	56.5105	55.8025	54.986	28.9277	30.9273	32.2145	33.7532	34.5356	35.8819	6.11431	5.6104	6.2125	6.65562	6.12675	6.3114	0.629575	0.689973	0.678531	0.725347	0.769794	0.779905	0.0469292	0.045849	0.0485496	0.0558626	0.0449439	0.0607525	0.0157559	0.0311373	0.0244733	0.00991398	0.0165531	-0.00949481
23	52.78	53.8089	60.0088	59.9126	59.136	58.2408	35.5338	37.9787	39.8011	41.3271	41.9596	43.3441	10.2581	9.44473	10.4262	11.2154	10.289	10.5924	1.12086	1.21038	1.19435	1.29403	1.38979	1.43216	0.0871369	0.0847003	0.0907918	0.0869881	0.0608656	0.0820065	0.033821	0.0202275	0.00829609	0.00953717	0.00501764	-0.00954747
24	55.2733	56.3747	62.9723	62.914	62.2247	61.182	41.0926	43.6948	46.1868	47.6035	48.0787	49.503	16.4323	15.1542	16.7427	18.0494	16.5745	17.0489	2.02143	2.19218	2.15011	2.35758	2.52993	2.64144	0.193827	0.191166	0.197819	0.195942	0.187453	0.223237	0.04102	0.0683634	0.0633125	0.0621686	0.0324053	0.0140158
25	57.2388	58.3952	65.3383	65.1314	64.5401	63.508	45.5237	48.3736	51.3095	52.5649	52.9796	54.2958	24.1004	22.2881	24.7734	26.8481	24.6039	25.404	3.61155	3.89095	3.84945	4.21632	4.51161	4.68427	0.345768	0.320779	0.383252	0.355625	0.329567	0.365479	0.0450098	0.0634253	0.0482501	0.0689251	0.0400327	0.0229742
26	58.883	60.0981	67.2044	67.233	66.4704	65.3533	48.9622	51.9014	55.2259	56.2034	56.5889	57.8532	32.2411	29.9767	33.4145	36.5062	33.3856	34.4718	6.26408	6.72486	6.66772	7.30823	7.84475	8.14797	0.64997	0.61996	0.694985	0.667336	0.615901	0.680149	0.0901532	0.115093	0.0760099	0.088303	0.0612202	0.0527611
27	60.35	61.5605	69.0514	69.0085	68.2202	67.0895	51.938	54.8942	58.5645	59.523	59.7223	61.0704	39.4758	36.8673	41.3344	45.4239	41.4659	42.8162	10.523	11.3164	11.2407	12.3538	13.1651	13.7118	1.18426	1.12965	1.26618	1.19099	1.11973	1.21518	0.148158	0.194503	0.14261	0.158317	0.157395	0.132751
28	61.5733	62.8913	70.3386	70.4531	69.7402	68.6269	54.2392	57.2897	61.1411	62.0301	62.1956	63.4519	45.2819	42.4283	47.6384	52.5536	47.9748	49.5645	16.7843	17.9056	17.8868	19.5575	20.6604	21.4119	2.15364	2.06702	2.28355	2.15715	2.02352	2.14715	0.242549	0.300405	0.25656	0.282022	0.287686	0.261248
29	62.6373	64.0196	71.7259	71.7038	70.9942	69.7675	56.2789	59.25	63.3149	64.1123	64.2487	65.3528	49.965	46.9227	52.7846	58.4649	53.293	55.0587	24.6897	26.1972	26.3469	28.5034	29.5568	30.5913	3.84502	3.69412	4.07137	3.83086	3.5824	3.80767	0.406891	0.452566	0.428282	0.481423	0.469161	0.461806
30	63.5372	65.045	72.7839	72.9323	72.2074	70.9661	57.862	61.0882	65.373	66.0221	66.0498	67.2588	53.7807	50.4714	56.8872	63.1931	57.5427	59.4345	33.1208	35.0431	35.383	37.7499	38.5871	39.702	6.76473	6.50882	7.1486	6.72035	6.29003	6.69222	0.723655	0.795113	0.755086	0.895838	0.865324	0.883532
31	64.2463	65.6965	73.6305	73.7231	73.0252	71.8332	59.3226	62.3566	66.8197	67.2588	67.2848	68.4081	56.5279	53.2272	60.0276	66.7587	60.7534	62.8366	40.4951	42.4123	43.1099	45.6385	45.8694	47.0883	11.3242	10.9041	11.9544	11.2416	10.6135	11.2018	1.26709	1.37904	1.28942	1.5319	1.53372	1.58122
32	64.9713	66.5399	74.401	74.522	73.8792	72.6512	60.4668	63.6837	68.1264	68.6513	68.5922	69.7743	59.0197	55.5815	62.6781	69.812	63.5021	65.6218	46.431	48.4491	49.505	51.9876	51.7716	52.9421	17.9554	17.3236	18.9032	17.9616	16.9915	17.7232	2.23079	2.42128	2.29584	2.71827	2.758	2.86747
33	65.5551	67.1304	75.1934	75.2747	74.6121	73.3251	61.4771	64.6383	69.3043	69.8051	69.7511	70.8373	60.9597	57.5172	64.8586	72.2993	65.8246	68.0232	51.1294	53.276	54.5375	56.9024	56.3474	57.5531	26.2584	25.3099	27.6811	26.6007	25.2231	25.9352	3.9308	4.22857	4.06967	4.85343	4.95084	5.19734
34	66.1377	67.6766	75.9001	75.9876	75.4153	74.022	62.3295	65.577	70.2607	70.6669	70.5167	71.5876	62.515	59.0718	66.7066	74.3632	67.69	69.9607	54.7745	57.0059	58.3797	60.6406	59.853	61.0246	34.7352	33.5404	36.5275	35.7461	33.932	34.4262	6.80988	7.28588	7.03852	8.33401	8.48987	8.9828
35	66.636	68.2873	76.4189	76.6464	75.9896	74.5863	63.185	66.4431	71.1339	71.5183	71.3945	72.4142	63.9666	60.4646	68.2481	76.2143	69.3439	71.704	57.84	60.0484	61.544	63.7988	62.752	63.8928	42.1357	40.6968	44.2942	43.8997	41.7456	41.8421	11.3267	12.1348	11.8216	13.8641	14.1369	14.8584
36	66.9707	68.681	76.9529	76.9362	76.3646	75.1088	63.8736	67.0575	71.9827	72.3022	72.0314	73.1636	65.2705	61.5957	69.5865	77.6545	70.6709	73.1854	60.2884	62.5557	64.1871	66.3249	65.118	66.254	47.9543	46.3368	50.3806	50.4943	48.0634	47.7467	17.7383	19.0768	18.6982	21.6438	21.8829	22.9575
37	67.34	69.0536	77.2964	77.4857	76.8594	75.4676	64.4037	67.6145	72.5939	72.9666	72.7113	73.8645	66.183	62.52	70.6725	78.9643	71.8338	74.3228	62.2678	64.5447	66.1955	68.4744	66.9673	68.0948	52.4059	50.6536	55.0345	55.4019	52.8701	52.2082	25.5348	27.3515	27.2416	30.8455	30.72	32.2127
38	67.7969	69.4898	77.7656	78.034	77.34	75.9154	64.9467	68.1873	73.1808	73.4415	73.2468	74.3093	67.0762	63.4467	71.8458	80.0087	72.9318	75.3662	63.9196	66.3044	68.0434	70.1463	68.4574	69.7149	56.0711	54.22	58.8477	59.6271	56.8629	55.8411	33.2773	35.5877	35.9913	39.6496	38.9855	40.6236
39	68.0174	69.6832	78.1117	78.2766	77.6205	76.3166	65.378	68.6021	73.6628	73.8812	73.611	74.7941	67.9328	64.1486	72.5236	81.0145	73.7202	76.2872	65.3833	67.686	69.4463	71.6021	69.8887	70.9228	58.91	56.9419	61.8622	62.8011	59.943	58.7287	39.8141	42.481	43.4457	47.0238	45.7215	47.5278
40	68.3123	70.0378	78.5047	78.653	78.0374	76.5974	65.8185	69.0991	74.1906	74.3419	74.0834	75.248	68.597	64.8	73.3946	81.9254	74.5105	77.0148	66.5583	68.9898	70.7033	72.848	70.9984	72.1283	61.2271	59.1703	64.3123	65.5687	62.4422	61.0832	45.0112	47.9363	49.3729	52.7444	50.9438	52.7802
41	68.4974	70.2382	78.6683	78.8642	78.2154	76.793	66.1845	69.3548	74.3785	74.4917	74.275	75.4002	69.1062	65.2515	73.9613	82.5009	75.1679	77.7046	67.4563	69.9228	71.7655	73.7127	71.8099	72.7851	63.0944	60.9683	66.2834	67.5647	64.514	63.0041	48.9724	52.0377	53.7411	56.9754	54.7777	56.7173
42	68.6535	70.5183	78.994	79.1946	78.5488	77.1142	66.5241	69.783	74.8648	75.0651	74.7461	75.8935	69.6475	65.8605	74.6233	83.1689	75.7736	78.3301	68.4099	70.9228	72.7652	74.7326	72.9309	73.9674	64.7286	62.526	68.0326	69.522	66.3606	64.667	52.1916	55.5146	57.5175	60.5372	58.0187	59.9482
43	68.8798	70.7382	79.1595	79.384	78.7582	77.3787	66.7612	70.063	75.2081	75.3291	75.0566	76.1592	70.048	66.2723	75.0586	83.7924	76.3077	78.841	69.2601	71.641	73.6009	75.5345	73.5365	74.686	66.0911	63.8415	69.4653	70.9718	67.7635	66.0162	54.6468	58.1036	60.3589	63.3932	60.5866	62.49
44	68.9992	70.7852	79.3796	79.6079	79.0113	77.4969	67.0756	70.287	75.4201	75.6422	75.2969	76.355	70.5306	66.5608	75.4816	84.29	76.7305	79.4486	69.9536	72.3228	74.2576	76.3284	74.3083	75.2221	67.2376	64.9342	70.6925	72.2985	69.0745	67.2248	56.6968	60.2962	62.6997	65.6212	62.5315	64.5917
45	69.0469	70.9712	79.4652	79.6318	79.0871	77.6242	67.2245	70.4622	75.6149	75.882	75.4953	76.595	70.9572	66.9659	75.8931	84.6916	77.0724	79.6627	70.4881	72.9597	74.8278	76.8699	74.7296	75.8394	68.175	65.8835	71.6123	73.4702	70.0969	68.1965	58.4557	61.9962	64.6048	67.4972	64.1833	66.1037
46	69.2153	71.1691	79.7585	79.9117	79.3186	77.8254	67.4379	70.6123	75.8003	76.0327	75.6799	76.6915	71.2441	67.2327	76.1724	85.1868	77.5369	80.1103	70.969	73.4102	75.3676	77.3109	75.0535	76.0532	69.0814	66.7345	72.6017	74.3609	71.0488	69.0634	59.8203	63.5958	66.1702	68.9662	65.5674	67.4384
47	69.3985	71.2805	79.7606	80.0212	79.3687	77.9365	67.6436	70.7976	76.0015	76.1225	75.8121	76.9819	71.3841	67.5508	76.58	85.5041	77.8088	80.5673	71.4321	73.8522	75.8129	77.7481	75.695	76.5982	69.8924	67.4767	73.516	75.203	71.9095	69.8349	61.1253	64.7346	67.5285	70.3157	66.8046	68.6298
48	69.4685	71.3195	79.992	80.118	79.4683	77.9739	67.8401	70.9438	76.1116	76.3625	75.9616	77.0195	71.7329	67.6755	76.8242	85.7188	78.0736	80.6809	71.8802	74.2346	76.2068	78.1533	75.9397	76.9816	70.4091	68.0067	74.0127	75.8742	72.5536	70.4652	62.1188	65.8454	68.662	71.4207	67.8039	69.6591
49	69.5632	71.4782	80.0596	80.1886	79.5709	78.104	67.7986	71.1487	76.4675	76.5147	76.0612	77.1596	71.912	67.9778	77.0846	86.0756	78.3504	80.9944	72.1318	74.5593	76.5412	78.4752	76.3163	77.3805	71.035	68.5985	74.6898	76.5965	73.1737	71.081	62.9629	66.8397	69.6245	72.2727	68.659	70.5767
50	69.5365	71.4375	80.1121	80.3371	79.7594	78.2483	67.9901	71.2276	76.3945	76.5579	76.1718	77.265	72.1693	68.1585	77.3046	86.3292	78.473	81.2984	72.5183	74.9479	76.997	78.934	76.5328	77.6333	71.5216	69.0508	75.2279	77.1288	73.7057	71.5213	63.7533	67.6446	70.4123	73.1195	69.4075	71.2027
Fmax	49.2566	49.2976	55.6491	54.7004	54.1613	53.4299	48.2453	51.6889	54.4682	55.6878	55.5511	56.8618	52.9154	50.1242	56.6661	62.8466	57.2815	58.6317	53.5826	54.5902	56.1754	59.1906	57.8027	59.1754	33.1929	53.5209	57.8645	58.5732	55.8717	54.9882	50.4416	53.3155	55.651	58.517	53.3368	54.9479
B	1.58474	1.52908	1.54574	1.48655	1.5102	1.51158	1.57706	1.59453	1.55367	1.5771	1.5692	1.57396	1.56721	1.58887	1.58007	1.56159	1.57195	1.53752	1.51134	1.44886	1.46185	1.51941	1.50982	1.52495	1.85979	1.56187	1.54395	1.51865	1.52401	1.5404	1.50442	1.48041	1.47758	1.50505	1.389	1.38028
C	17.466	17.6069	17.6317	17.7467	17.7525	17.7304	21.4973	21.4711	21.6236	21.4503	21.3435	21.2536	25.421	25.4523	25.5438	25.6552	25.6148	25.6505	29.4934	29.4747	29.5184	29.3166	29.1222	29.0498	33.5931	33.2894	33.304	33.526	33.5205	33.3662	37.2152	37.2122	37.3607	37.061	36.9293	36.8729
D	0.923611	0.876716	0.885171	0.832221	0.850667	0.852605	0.933509	0.946009	0.904066	0.934287	0.936124	0.948425	0.938553	0.956258	0.939858	0.91838	0.929851	0.90196	0.889342	0.839691	0.851751	0.908704	0.909006	0.927165	1.21221	0.947767	0.928043	0.895843	0.905757	0.91778	0.88847	0.870648	0.868505	0.899785	0.823216	0.822638
Fb	-0.0829132	-0.0909502	-0.100395	-0.114694	-0.108558	-0.105538	-0.0473141	-0.050656	-0.0613017	-0.0536678	-0.0515242	-0.0552833	-0.0461342	-0.0406178	-0.0430184	-0.0532281	-0.0442334	-0.0477531	-0.0320808	-0.032807	-0.0384188	-0.0394152	-0.0398139	-0.0403495	-0.131928	-0.0281583	-0.0302726	-0.0346378	-0.0349009	-0.0254005	-0.0134981	-0.0043691	-0.0180839	-0.0193115	-0.0250563	-0.0359778
x flex	17.34	17.4057	17.4432	17.4736	17.5083	17.4893	21.3888	21.3826	21.4669	21.3431	21.24	21.1702	25.3216	25.3812	25.4458	25.5223	25.5005	25.4919	29.3162	29.2216	29.2839	29.1711	28.9781	28.9344	33.951	33.2056	33.1887	33.3589	33.3696	33.234	37.0373	37.0072	37.1524	36.9021	36.6591	36.6034
y flex	24.9307	25.2042	28.399	28.2485	27.851	27.4638	24.4013	26.0746	27.7162	28.1618	28.0838	28.6701	26.7406	25.2403	28.6346	31.8975	29.0059	29.8669	27.3833	28.2222	28.9534	30.1158	29.4064	29.9874	15.8768	27.0132	29.3268	29.8907	28.4478	27.9338	25.7998	27.3904	28.5909	29.8512	27.6922	28.5226
slope (m)	7.5786	7.72798	8.65717	8.66638	8.50999	8.39382	7.48475	7.96484	8.48894	8.64149	8.6691	8.88367	8.27509	7.77774	8.79343	9.79497	8.90432	9.22679	8.53864	8.90106	9.12229	9.44871	9.28676	9.4734	4.71676	8.42455	9.15235	9.31132	8.88255	8.68622	8.07248	8.61266	8.99975	9.39998	9.01001	9.33854
Cy0	14.0395	14.1326	14.1512	14.2009	14.2228	14.2048	18.1223	18.1025	18.1947	18.078	17.9945	17.9367	22.0846	22.1308	22.1846	22.2603	22.238	22.2497	26.1054	26.0472	26.1057	25.9797	25.8074	25.7647	30.557	29.9958	29.9811	30.1451	30.163	30.0152	33.8396	33.8264	33.9735	33.7243	33.5829	33.5453
Cy0 corrected	13.5648	13.7929	13.9225	14.0518	13.994	13.9574	17.6845	17.6976	17.9343	17.8781	17.8974	17.9409	21.9363	21.7961	21.977	22.2245	22.0428	22.2409	26.1771	26.4667	26.5399	26.3649	26.3238	26.3207	28.318	30.0636	30.2016	30.3418	30.3508	30.0491	33.9585	34.2103	34.465	34.2947	35.1618	35.3909
m calibration curve	8.60603
y flex calibration curve	27.6943

## Sheet: Block High eff
							INPUT DNA		10000																								Averages
	CONTROLS						ND1F2 500 nM ND1R2 500 nM ND1R2Block 50 nM			ND1F2 500 nM ND1R2 500 nM ND1R2Block 100 nM			ND1F2 500 nM ND1R2 500 nM ND1R2Block 250 nM			ND1F2 500 nM ND1R2 500 nM ND1R2Block 500 nM			ND1F2 500 nM ND1R2 500 nM ND1R2Block 750 nM			ND1F2 500 nM ND1R2 500 nM ND1R2Block 1000 nM			ND1F2 500 nM ND1R2 500 nM ND1R2Block 2000 nM			ND1F2 500 nM ND1R2 500 nM ND1R2Block 3750 nM					Controls	50 nM	100 nM	250 nM	500 nM	750 nM	1000 nM	2000 nM	3750 nM
Cycles	B7	B8	B9	B10	B11	B12	A7	A8	A9	A10	A11	A12	A1	A2	A3	A4	A5	A6	B1	B2	B3	B4	B5	B6	B7	B8	B9	B10	B11	B12			-0.157259	-0.137516	-0.150712	-0.168312	-0.22014	-0.238482	-0.305445	-0.41667	-0.701523
1	-0.144383	-0.147632	-0.180136	-0.170328	-0.159304	-0.141768	-0.121837	-0.145449	-0.145262	-0.153245	-0.156393	-0.142498	-0.156953	-0.169008	-0.178975	-0.216803	-0.230435	-0.213183	-0.245666	-0.241677	-0.228104	-0.312478	-0.303816	-0.300043	-0.390757	-0.413641	-0.445612	-0.743749	-0.674685	-0.686134			-0.00583935	0.00801138	0.0101425	0.00874432	0.00733644	0.00992243	0.00761278	0.00781947	0.0158172
2	-0.0143727	-0.000107197	-0.0166315	-0.000127546	-0.00185471	-0.00194249	0.0140351	0.00807081	0.00192822	0.0163465	0.00444698	0.00963416	0.00811823	0.00430401	0.0138107	0.0112556	0.0079398	0.00281395	0.011529	0.013136	0.00510219	0.0162851	0.0028034	0.00374983	0.014816	0.00893135	-0.000288965	0.0149022	0.0134113	0.0191379			-0.00060877	0.00274806	-0.00344949	-0.00646262	0.00368183	0.011631	0.00725224	0.0179441	0.019472
3	0.00844503	0.00399558	-0.00450913	-0.0038827	-0.00151152	-0.00618988	0.00883776	-0.00237157	0.00177799	-0.000334112	-0.00725733	-0.00275702	-0.00981548	-0.00708681	-0.00248558	0.000688964	0.00266673	0.00768979	0.0172381	0.00737979	0.0102751	-0.00453594	0.0127328	0.0135598	0.0196311	0.0189346	0.0152667	0.0200446	0.00734479	0.0310266			0.0025649	-0.00347058	0.000979635	-0.00203308	0.00094731	0.00639855	0.00134275	-0.00332228	0.00118559
4	0.00423112	-0.000263433	0.00677682	-0.00438848	0.00657513	0.00245824	-0.0159999	0.00849704	-0.00290887	0.000265895	0.00488117	-0.00220816	-0.00922748	0.010404	-0.00727579	-0.00387974	0.00337461	0.00334706	0.000316119	0.00255937	0.0163202	0.00135416	-0.00170071	0.0043748	-0.00464092	-0.0057402	0.000414264	0.00500099	0.00287529	-0.0043195			0.00754279	-0.00200338	-0.00673284	0.00354808	-0.00273254	-0.0160635	-0.00915479	-0.0123461	-0.0183938
5	0.00827402	0.00765239	0.0110215	0.00410592	0.00689806	0.00730483	-0.00102769	-0.0123876	0.00740512	-0.0165559	-0.00117125	-0.00247135	0.0142125	-0.00677874	0.00321043	0.00101688	-0.00716742	-0.00204707	-0.0176565	-0.0145114	-0.0160226	-0.00931414	-0.00709946	-0.0110508	-0.0100882	-0.0163947	-0.0105553	-0.0230479	-0.0150062	-0.0171272			-0.00365956	-0.00528549	-0.000939857	-0.00379669	-0.00923304	-0.0118884	-0.00705298	-0.0100952	-0.018081
6	-0.00657749	-0.0112773	0.00334231	0.00429281	-0.010107	-0.00163071	-0.00584528	-0.00180873	-0.00820246	0.000277639	-0.000899577	-0.00219763	-0.00328781	-0.000842494	-0.00725977	-0.00908166	-0.00681372	-0.0118037	-0.0114267	-0.00856376	-0.0156749	-0.00378919	-0.00673607	-0.0106337	-0.019718	-0.00573105	-0.00483662	-0.0169	-0.00862519	-0.0287179			0.00368027	-0.00710482	-0.000508982	-0.00557561	-0.00912973	0.00251569	-0.00710743	6.59965e-05	-0.00638947
7	-0.00676355	0.00764977	0.0031587	0.00410148	0.0111872	0.00274801	-0.00585093	0.00334347	-0.018807	-0.00523299	-0.0124829	0.0161889	0.00264515	-0.0121015	-0.00727045	0.00133667	-0.00681372	-0.0219121	-0.0055479	-0.00857215	0.0216671	-0.00895939	-0.00673043	-0.00563248	0.000389111	-0.000620028	0.000428906	-0.000459299	-0.0143835	-0.0043256			-0.00300332	0.00227872	-0.0026247	-0.00140603	-0.00171791	-0.00426859	-0.00637895	-0.00757991	-0.0202116
8	-0.00364404	-0.00821	-0.00143754	-0.00474658	-0.00667333	0.00669156	-0.00535166	0.00388049	0.00830734	0.00638686	-0.000337786	-0.0139232	-0.00269573	-0.0002392	-0.00128317	0.00197798	-0.0061224	-0.00100932	-0.0224893	0.00332347	0.00636002	-0.00823608	-0.0110771	0.00017628	-0.0189053	0.00535957	-0.00919402	-0.0264829	-0.0188661	-0.015286			0.00939847	0.00326221	-0.001033	0.00410457	0.00275953	-0.0046017	-0.00378718	-0.0064919	-0.0161166
9	0.00753702	0.0108301	0.0181586	0.0115651	0.00618187	0.00211804	0.00935904	0.0033392	-0.00291162	0.00578598	-0.00668718	-0.00219779	0.0204358	-0.000851645	-0.00727045	0.0117596	-0.00682455	0.00334355	-0.00555842	-0.00857383	0.000327152	-0.00895298	-0.011796	0.00938744	-0.0197312	-0.015961	0.0162165	-0.00594644	-0.0258941	-0.0165094			0.00595004	-0.00449941	0.0073224	0.0102442	-0.00149832	-0.00391158	-0.00278822	-0.0158044	-0.0181636
10	0.00412577	0.00360675	0.00684357	0.00384688	0.023839	-0.00656175	-0.00521649	-0.0114405	0.0031588	0.017564	-0.000206698	0.00460986	0.0211862	-9.68164e-05	0.00964334	0.00734617	-0.00595018	-0.00589096	-0.0164417	0.00351028	0.00119666	-0.00289509	-0.00585055	0.000380969	-0.0237183	-0.0199985	-0.0036965	-0.0151884	-0.0243178	-0.0149847			0.00191661	0.00490975	-0.000931722	0.0036377	0.00271092	-0.00116848	-0.00201101	-0.0170638	-0.0354847
11	0.00028301	-0.00396147	0.0147867	-0.000148955	0.0024535	-0.00191311	0.014431	0.0084975	-0.00819925	0.000284198	-0.000889663	-0.0021897	0.0026418	0.004772	0.00349929	0.00132569	0.013573	-0.00676592	-0.0173048	0.00814794	0.0056514	-0.00380002	0.00841731	-0.0106503	-0.00966393	-0.0261805	-0.0153471	-0.0278343	-0.0316261	-0.0469937			0.00262783	0.00337907	0.001143	0.000120398	0.0097475	-0.00655276	-0.00869726	-0.0167414	-0.0484221
12	0.00718338	0.0033589	0.0144381	-0.00458264	0.00211744	-0.00674823	0.0145578	-0.00167596	-0.00274467	0.000435488	0.00504623	-0.00205273	0.00279309	-0.000695334	-0.00173656	0.0171287	0.00354594	0.00856786	-0.0171256	-0.00837809	0.00584536	-0.0191026	-0.00655876	-0.000430397	-0.0195198	-0.0208517	-0.00985267	-0.0439132	-0.0485676	-0.0527855			0.0148026	0.00733385	-0.00249923	-0.00148359	7.29312e-05	-0.00975484	-0.0131754	-0.0195949	-0.0433116
13	0.0215217	0.00699406	0.0181966	0.0115913	0.019142	0.0113697	0.00479698	0.0141947	0.00300988	0.0064006	-0.00611892	-0.00777936	-0.00269283	-0.00586532	0.00410737	0.0124048	-0.00612393	-0.00606205	-0.02248	-0.00781966	0.00103509	-0.0237226	-0.000958476	-0.0148452	-0.0289546	-0.00485925	-0.0249709	-0.0483782	-0.0418768	-0.0396799			0.0301653	0.00951989	0.0097756	0.0106796	0.0074791	-0.0125214	-0.00742704	-0.0134029	-0.0327285
14	0.0313362	0.0254503	0.0332534	0.0395489	0.0313997	0.0200033	0.020522	0.00442552	0.00361214	0.0125005	0.0118042	0.0050221	0.0156983	0.0116287	0.00471161	0.00783272	0.00987804	0.00472653	-0.0217925	-0.00149589	-0.0142757	-0.0230004	-0.000252649	0.000971901	-0.0231108	-0.0193603	0.00226234	-0.0305919	-0.0291176	-0.038476			0.0467255	0.0195731	0.0133771	0.0213031	0.0122693	0.00196035	-0.000899762	-0.0190787	-0.0429959
15	0.0486448	0.0326763	0.0525378	0.0555261	0.0482914	0.0426766	0.0253332	0.0247777	0.0086083	0.0177192	0.0115245	0.0108875	0.0153905	0.022568	0.0259508	0.0127057	0.0197286	0.0043737	-0.00450798	0.00368719	0.00670185	0.00244776	-0.0107339	0.00558683	-0.018492	-0.0300261	-0.0087179	-0.0422218	-0.035487	-0.0512788			0.0915176	0.0581527	0.0467701	0.0428968	0.0284248	0.00425868	0.00476084	-0.00786539	-0.0282527
16	0.0818327	0.0828956	0.0922965	0.097007	0.105058	0.0900163	0.0664294	0.0510884	0.0569402	0.0513916	0.0468251	0.0420937	0.0456654	0.0456994	0.0373257	0.0446379	0.0204145	0.020222	-0.00970793	0.00441135	0.0180726	-0.0123466	0.0152565	0.0113727	-0.00762377	-0.0292013	0.0132289	-0.0244545	-0.0285173	-0.0317863			0.175119	0.109403	0.105961	0.0721286	0.0497632	0.0220072	0.0209658	-0.014007	-0.0566125
17	0.171486	0.170969	0.202549	0.170927	0.17456	0.160224	0.111537	0.102055	0.114619	0.122457	0.0925607	0.102866	0.0687807	0.0731936	0.0744114	0.0491633	0.0503019	0.0498245	0.00721629	0.0147856	0.0440196	0.0127328	0.0195643	0.0306002	-0.0185384	-0.0147152	-0.00876749	-0.0477506	-0.0585727	-0.0635143			0.350183	0.204606	0.175864	0.127046	0.0825771	0.0503943	0.0298679	-0.0153764	-0.0634042
18	0.342713	0.337612	0.362236	0.369963	0.349948	0.338627	0.208181	0.189955	0.215682	0.183404	0.179717	0.164471	0.128416	0.124136	0.128586	0.085955	0.0863581	0.0754184	0.0369233	0.048571	0.0656885	0.0337231	0.0198913	0.0359892	-0.00809778	-0.0296846	-0.00834692	-0.0635438	-0.0637338	-0.0629349			0.691428	0.400973	0.323881	0.236161	0.140074	0.0907993	0.0698678	0.00651009	-0.0507641
19	0.683802	0.653991	0.719098	0.725186	0.715512	0.650979	0.400587	0.380287	0.422045	0.353936	0.312518	0.305188	0.246736	0.241943	0.219805	0.132478	0.136951	0.150793	0.0717587	0.0926976	0.107942	0.0539364	0.0750728	0.0805943	-0.00360345	0.000465851	0.0226679	-0.0533774	-0.0414078	-0.0575072			1.35795	0.79575	0.669439	0.464703	0.295243	0.170572	0.130423	0.0213738	-0.053259
20	1.33358	1.28864	1.41937	1.42138	1.39208	1.29269	0.795932	0.761372	0.829946	0.706473	0.65963	0.642212	0.45415	0.478006	0.461954	0.298953	0.299885	0.28689	0.153734	0.170357	0.187624	0.115552	0.130341	0.145375	0.0161063	0.0205123	0.0275029	-0.0484137	-0.0534156	-0.0579478			2.64612	1.52055	1.26922	0.869063	0.530713	0.31934	0.248756	0.0503299	-0.0549504
21	2.57197	2.5231	2.74877	2.79275	2.71358	2.52655	1.51622	1.45201	1.59343	1.35708	1.25024	1.20034	0.857699	0.888831	0.86066	0.528266	0.52436	0.539512	0.294742	0.326328	0.336951	0.229098	0.246566	0.270604	0.0461304	0.0459197	0.0589397	-0.0539064	-0.0591675	-0.0517772			5.09853	2.91249	2.42024	1.63553	0.995549	0.622895	0.491081	0.130975	-0.0448384
22	4.95719	4.84093	5.32281	5.35315	5.2374	4.87968	2.90215	2.79321	3.04212	2.58219	2.39776	2.28077	1.62406	1.67755	1.60498	0.977083	1.00459	1.00497	0.583211	0.633292	0.652181	0.47219	0.469399	0.531653	0.131806	0.117694	0.143426	-0.0422563	-0.0412307	-0.051028			9.60449	5.47319	4.55035	3.05086	1.86194	1.13376	0.887545	0.269648	-0.0329261
23	9.30686	9.12566	10.0356	10.086	9.86334	9.20951	5.43289	5.23575	5.75093	4.84221	4.51073	4.29812	3.02404	3.12329	3.00524	1.84155	1.86093	1.88335	1.07602	1.16725	1.15803	0.858449	0.857682	0.946504	0.286284	0.24915	0.273509	-0.0273681	-0.0253412	-0.0460691			17.2534	10.0146	8.38665	5.62072	3.3873	2.07075	1.61944	0.484278	0.000736865
24	16.6772	16.4003	18.0379	18.0786	17.7477	16.5789	9.95038	9.5785	10.5151	8.90906	8.33611	7.91477	5.53253	5.77775	5.55188	3.29384	3.42536	3.4427	1.97337	2.10125	2.13765	1.55866	1.57357	1.72608	0.504873	0.450918	0.497044	0.0190672	0.000840919	-0.0176975			28.9156	17.4082	14.7909	10.1692	6.20723	3.75038	2.95588	0.860083	0.0389189
25	27.8493	27.4623	30.292	30.3653	29.7582	27.7663	17.2668	16.6364	18.3214	15.7096	14.6793	13.9838	10.0519	10.4347	10.021	6.02733	6.26421	6.33014	3.55734	3.82542	3.86838	2.8722	2.8545	3.14093	0.888115	0.82018	0.871953	0.0753468	0.0375548	0.00385524			43.3917	27.7787	24.3699	17.4613	10.9484	6.70675	5.26653	1.52175	0.107339
26	41.7465	41.1604	45.4431	45.5528	44.7924	41.6549	27.53	26.5291	29.277	25.7191	24.2591	23.1314	17.1876	17.9216	17.2747	10.6778	11.01	11.1573	6.37433	6.84652	6.89941	5.12383	5.07915	5.59663	1.59677	1.43868	1.5298	0.124751	0.136275	0.0609893			56.882	39.3233	36.0076	27.7803	18.4649	11.6896	9.21912	2.65315	0.228732
27	54.7003	53.9484	59.6743	59.7211	58.7287	54.5191	38.9376	37.5124	41.5198	37.8926	35.913	34.217	27.3586	28.4282	27.554	17.9913	18.638	18.7653	11.1453	11.9043	12.0192	8.98234	8.89708	9.77795	2.79368	2.4928	2.67296	0.278527	0.25249	0.15518			66.7789	49.1165	47.0167	39.788	28.9012	19.3574	15.5386	4.59697	0.424375
28	64.0341	63.3078	69.9534	70.2051	69.0105	64.1625	48.6157	46.7412	51.9926	49.0897	47.1003	44.8601	39.062	40.6277	39.6742	28.1916	29.238	29.2739	18.5322	19.7031	19.8369	15.1892	15.0085	16.4182	4.83621	4.34164	4.61307	0.500657	0.452431	0.320038			72.7085	55.7673	55.064	50.4024	40.7962	29.6763	24.5775	7.83287	0.740432
29	69.7804	68.9023	76.2546	76.378	75.1409	69.7948	55.1626	53.0404	59.099	57.2687	55.2193	52.7041	49.4537	51.3262	50.4272	39.8684	41.3344	41.1857	28.447	30.2737	30.3081	24.0272	23.7712	25.9342	8.22607	7.39746	7.87509	0.846919	0.788542	0.585836			76.2958	59.7767	60.0896	57.9881	51.3936	41.0537	35.7055	12.9633	1.27112
30	73.1352	72.2189	79.9889	80.1996	79.0128	73.2193	59.119	56.7075	63.5035	62.4734	60.1746	57.6208	56.8298	59.0806	58.054	50.2902	52.253	51.6376	39.6167	41.9733	41.5713	34.917	34.6834	37.516	13.5486	12.2806	13.0606	1.44551	1.33858	1.02927			78.4339	62.1284	63.0554	62.8181	59.0561	50.8561	46.4327	20.3805	2.09562
31	75.1531	74.1751	82.215	82.4955	81.2021	75.3626	61.4529	58.8693	66.0631	65.4787	63.2957	60.3918	61.7042	63.9166	62.8335	57.8019	60.1348	59.2315	49.3627	51.9724	51.2331	45.3941	45.328	48.5761	21.1181	19.4524	20.5711	2.40585	2.20025	1.68077			79.8917	63.6748	64.9463	65.7325	64.0762	57.972	54.7601	29.8638	3.48934
32	76.4909	75.5955	83.7481	84.0991	82.6768	76.74	62.9715	60.3428	67.71	67.449	65.1072	62.2826	64.4973	66.8665	65.8337	62.7746	65.3106	64.1435	56.4356	59.3729	58.1075	53.5847	53.6884	57.0072	30.5407	28.8355	30.2153	3.98095	3.65143	2.83563			80.7973	64.671	66.1588	67.6298	67.3107	62.5907	60.4223	39.806	5.715
33	77.3924	76.4266	84.6635	85.0636	83.6514	77.5863	63.9257	61.2195	68.8677	68.7545	66.2874	63.4344	66.3945	68.7669	67.728	65.9677	68.5679	67.3965	61.0999	64.1076	62.5645	59.1097	59.344	62.8131	40.0064	38.7823	40.6294	6.51752	5.95136	4.67613			81.3728	65.3877	67.0072	68.9056	69.4557	65.6723	64.2205	48.2822	9.16564
34	77.9409	76.931	85.2618	85.6557	84.3077	78.1394	64.6487	61.9276	69.5869	69.6471	67.126	64.2485	67.7113	70.0276	68.9779	68.105	70.803	69.4592	64.1608	67.2837	65.5725	62.8717	63.0112	66.7786	47.8236	47.5694	49.4537	10.4317	9.57117	7.49406			81.7362	65.7212	67.497	69.7961	70.9379	67.5917	66.5616	54.406	14.2101
35	78.2558	77.3192	85.6612	86.0433	84.6512	78.4863	64.9958	62.2286	69.939	70.1186	67.7027	64.6699	68.4881	71.0343	69.8658	69.5323	72.3476	70.934	66.082	69.2442	67.449	65.1104	65.3793	69.195	53.4202	53.9556	55.8423	16.0826	14.7845	11.7633			81.999	66.0675	67.8649	70.3211	71.9569	68.9726	68.2084	58.5058	21.1749
36	78.4931	77.4606	85.984	86.318	84.9011	78.8372	65.3311	62.4876	70.3839	70.57	67.9641	65.0604	69.0918	71.4924	70.3791	70.513	73.4183	71.9394	67.4086	70.6505	68.8587	66.7426	66.9662	70.9164	57.1298	58.2541	60.1336	23.7221	22.0299	17.7726			82.1148	66.1737	68.0488	70.7317	72.6768	70.0022	69.4502	61.313	29.5623
37	78.5965	77.6188	86.1002	86.4265	85.0492	78.8978	65.3582	62.6191	70.5438	70.7517	68.2022	65.1925	69.5237	71.9289	70.7425	71.2342	74.0925	72.7037	68.4296	71.7453	69.8316	67.9315	68.2257	72.1934	59.7222	61.125	63.0917	32.8631	30.5411	25.2826			82.1639	66.2696	68.2245	71.0255	73.2283	70.7035	70.2373	63.2583	38.325
38	78.6679	77.6193	86.15	86.512	85.0677	78.9664	65.5211	62.6737	70.6139	70.9643	68.3863	65.3229	69.7699	72.2281	71.0785	71.8897	74.7266	73.0686	69.0963	72.4821	70.5321	68.8006	68.9611	72.9503	61.5058	63.1075	65.1617	42.0988	39.3605	33.5155			82.1253	66.2846	68.2621	71.1963	73.635	71.2197	70.9221	64.686	45.7199
39	78.6405	77.652	86.1062	86.5191	84.9625	78.8712	65.5028	62.6128	70.7382	71.0027	68.3782	65.4054	69.9314	72.3603	71.2973	72.1856	75.1859	73.5335	69.6325	73.0649	70.9618	69.4335	69.6518	73.681	62.8455	64.6029	66.6095	49.6051	46.6174	40.9373			82.0833	66.3599	68.431	71.2989	73.8357	71.5494	71.3921	65.6992	51.5045
40	78.5986	77.5405	86.0627	86.404	85.0431	78.8508	65.5807	62.7602	70.7389	71.1573	68.5419	65.5937	70.0248	72.4866	71.3852	72.5045	75.2975	73.7051	69.9539	73.3953	71.2991	69.8629	70.1475	74.1659	63.7277	65.6019	67.768	55.4219	52.258	46.8335			82.043	66.2182	68.2207	71.3298	74.1055	71.8727	71.7064	66.4762	55.288
41	78.5378	77.5087	85.98	86.3951	84.994	78.8423	65.5287	62.5322	70.5938	71.0445	68.3137	65.3039	70.0302	72.446	71.5133	72.7792	75.571	73.9661	70.3469	73.6054	71.6657	70.207	70.3931	74.5191	64.4455	66.4597	68.5234	59.236	55.8684	50.7595			82.0549	66.2607	68.2367	71.3797	74.1238	72.0668	71.9663	67.033	58.1847
42	78.5298	77.5461	86.0388	86.366	84.9629	78.8859	65.5242	62.5944	70.6635	71.0608	68.359	65.2902	70.1137	72.5595	71.4657	72.7858	75.537	74.0487	70.4412	73.8738	71.8853	70.4713	70.6265	74.801	64.9691	67.0382	69.0918	62.0638	58.7352	53.7549			82.0292	66.1923	68.1588	71.3572	74.2393	72.2335	72.073	67.4772	60.1516
43	78.5342	77.4631	85.9837	86.2683	84.9817	78.9442	65.4553	62.5151	70.6065	70.9577	68.235	65.2837	70.1062	72.5733	71.3921	72.8126	75.7508	74.1545	70.6449	74.0036	72.0519	70.6062	70.7279	74.8849	65.3278	67.4741	69.6296	64.0073	60.6638	55.7835			81.8943	66.1702	68.1597	71.3671	74.3342	72.2979	72.2674	67.81	61.6582
44	78.4933	77.3607	85.8069	86.2115	84.8022	78.6912	65.4349	62.4375	70.6381	70.9516	68.269	65.2586	70.1002	72.5282	71.4728	73.0315	75.7915	74.1797	70.7564	74.059	72.0782	70.8176	70.9398	75.0448	65.6694	67.8214	69.9393	65.596	62.0392	57.3393			81.833	66.1259	68.0984	71.4184	74.3334	72.3813	72.2645	68.0662	62.6828
45	78.3497	77.2674	85.8305	86.1902	84.761	78.599	65.3512	62.4753	70.5512	70.9265	68.154	65.2148	70.1314	72.6044	71.5194	72.963	75.7409	74.2963	70.7757	74.1796	72.1886	70.7594	70.9338	75.1003	65.8735	68.0035	70.3215	66.6282	63.0699	58.3503			81.7109	66.0739	68.0895	71.3183	74.315	72.3257	72.325	68.2971	63.5235
46	78.1719	77.2181	85.6932	86.0942	84.5436	78.5442	65.3461	62.3617	70.5139	70.9207	68.1826	65.1653	70.0305	72.4749	71.4494	72.9577	75.8022	74.185	70.7579	74.0734	72.1457	70.7901	71.06	75.125	66.0694	68.2693	70.5526	67.4719	63.8757	59.223			81.6995	65.9836	68.0974	71.1787	74.194	72.2992	72.2593	68.3698	64.1957
47	78.1475	77.1995	85.6854	86.0803	84.5472	78.5373	65.2487	62.2425	70.4596	70.925	68.1528	65.2143	69.8934	72.3614	71.2811	72.8781	75.6115	74.0922	70.7337	74.0944	72.0695	70.7835	70.8864	75.1079	66.2292	68.3189	70.5614	68.1284	64.6007	59.858			81.6367	65.9782	67.9982	71.1469	74.2678	72.2955	72.3233	68.4716	64.6614
48	78.154	77.068	85.6501	85.9036	84.5448	78.4997	65.2385	62.2579	70.4383	70.8586	68.0077	65.1283	69.8222	72.305	71.3135	73.0033	75.637	74.163	70.7394	74.083	72.0639	70.8452	70.9671	75.1577	66.2338	68.4568	70.7242	68.6543	65.0265	60.3033			81.5797	65.9306	68.0153	71.1009	74.2178	72.3621	72.3179	68.6192	65.1171
49	78.017	77.0787	85.5795	85.8684	84.4846	78.4501	65.1845	62.1403	70.4671	70.899	68.0316	65.1154	69.7459	72.2789	71.278	72.8863	75.6867	74.0805	70.7994	74.1244	72.1625	70.8323	70.98	75.1413	66.397	68.592	70.8686	69.1055	65.4244	60.8213			81.5178	65.8762	67.889	71.0597	74.1562	72.3065	72.3303	68.6229	65.3824
50	77.9607	76.9948	85.5128	85.8481	84.3815	78.4092	65.1108	62.118	70.3999	70.7359	67.9317	64.9993	69.7208	72.2591	71.1992	72.8036	75.6505	74.0146	70.8386	73.981	72.0998	70.8901	70.9704	75.1304	66.3682	68.5727	70.9276	69.3323	65.7915	61.0235
Fmax	78.2642	77.2564	85.7212	86.0822	84.6626	78.582	65.2654	62.3652	70.4213	70.7766	68.0968	65.1316	69.7778	72.2343	71.152	72.5564	75.373	73.8107	70.3843	73.7113	71.7182	70.4243	70.5752	74.7065	65.7827	67.9508	70.1696	68.7341	65.1463	60.5606
B	1.54402	1.53751	1.55726	1.56606	1.5594	1.56563	1.59132	1.55791	1.6246	1.65771	1.59598	1.59744	1.73195	1.72426	1.71856	1.92077	1.8975	1.89587	1.93857	1.93807	1.95317	1.97819	1.94218	1.98051	2.12457	2.1051	2.14063	2.17224	2.17078	2.15408
C	25.3801	25.3934	25.3384	25.3295	25.3486	25.3222	25.9363	26.0069	25.8675	26.1169	26.349	26.3646	26.8398	26.8421	26.8678	27.3404	27.4408	27.3915	28.2954	28.258	28.1051	28.6312	28.8087	28.601	30.6489	31.0014	30.8059	36.1127	36.1752	36.6549
D	1.23452	1.22908	1.26838	1.27646	1.26811	1.27801	1.2697	1.21844	1.32905	1.36456	1.25775	1.25527	1.42403	1.41532	1.42095	1.73016	1.67125	1.66647	1.68593	1.68624	1.73678	1.73314	1.64275	1.72702	1.79915	1.75022	1.83404	1.44523	1.44681	1.39902
Fb	0.04959	0.0457916	0.0591131	0.0571204	0.0572726	0.0498314	0.0454134	0.0351487	0.0472542	0.0555499	0.0402946	0.0395345	0.0600844	0.0576085	0.0600659	0.0798179	0.0726407	0.0680035	0.0560802	0.0683362	0.0762622	0.0570235	0.0601083	0.0706625	0.0448636	0.0469786	0.0608254	-0.00180386	-0.0028806	-0.0169287
x flex	25.7054	25.7105	25.7086	25.7118	25.719	25.7063	26.3163	26.3147	26.3297	26.6322	26.715	26.7277	27.4521	27.4411	27.4715	28.3934	28.4153	28.3598	29.308	29.2706	29.1833	29.719	29.7727	29.6831	31.8967	32.1797	32.1043	36.9126	36.977	37.3781
y flex	37.6718	37.2131	41.0667	41.191	40.5601	37.5916	31.2615	30.0856	33.4589	33.482	32.6657	31.2553	32.7745	33.9591	33.4311	33.0353	34.4939	33.7911	32.1548	33.6834	32.6317	32.0355	32.3785	34.0123	29.7444	30.8555	31.6487	32.1427	30.4581	28.4622
slope (m)	13.4619	13.329	14.7244	14.7278	14.5218	13.4525	10.9738	10.5941	11.7359	11.6365	11.388	10.8765	11.0965	11.5212	11.3972	10.873	11.3494	11.1168	10.3933	10.8878	10.5777	10.2509	10.3437	10.8534	8.98501	9.3137	9.54951	8.74614	8.29736	7.71
Cy0	22.9106	22.9221	22.9236	22.9188	22.9299	22.9156	23.4717	23.4781	23.4827	23.7597	23.8501	23.8577	24.5039	24.4986	24.5435	25.3625	25.3824	25.3263	26.2195	26.1832	26.1056	26.5994	26.6482	26.5558	28.5913	28.8718	28.7965	33.2374	33.3059	33.6843
Cy0 corrected	22.8736	22.9215	23.0846	23.0199	23.0403	22.9085	22.7587	22.7838	22.8465	22.906	23.0313	22.9347	22.9846	23.077	23.2113	23.1395	23.2107	23.1274	23.4579	23.4911	23.4432	23.5553	23.5748	23.5343	23.8022	24.0728	24.0354	25.0519	25.058	25.1073
m calibration curve	14.045
y flex calibration curve	39.3442
SOD probability	0.783294	0.622566	0.711211	0.737889	0.88039	0.785062	7.97835e-06	4.40732e-07	0.000814448	9.24583e-05	8.83486e-05	1.89019e-06	2.04013e-09	3.86722e-08	9.9552e-08	3.61836e-19	3.56742e-18	2.88865e-18	5.21341e-24	8.49841e-24	1.12287e-23	8.40758e-28	6.90751e-27	7.40333e-29	3.12279e-48	1.2484e-48	5.82424e-51	5.73145e-96	2.32663e-89	4.25338e-85
Log_input DNA Cy0	4.00274	3.99946	3.99902	4.00039	3.99723	4.00131	3.84189	3.84005	3.83874	3.75934	3.73342	3.73123	3.54598	3.54752	3.53462	3.29985	3.29414	3.31023	3.05414	3.06456	3.08682	2.94523	2.93124	2.95773	2.37421	2.29379	2.31539	1.04226	1.02263	0.914127
Log_input DNA Cy0 corrected	4.01337	3.99963	3.95288	3.97143	3.96558	4.00336	4.0463	4.03911	4.02114	4.00408	3.96814	3.99584	3.98153	3.95504	3.91656	3.93713	3.91673	3.94061	3.84584	3.83634	3.85007	3.81793	3.81234	3.82395	3.74714	3.66957	3.6803	3.38889	3.38712	3.37299
intecept calibration curve	36.873
slope calibration curve	-3.4882
Rel_err Cy0	0.00274111	-0.000542228	-0.000977466	0.000387341	-0.00277147	0.00131453	-0.158107	-0.15995	-0.161257	-0.240658	-0.266576	-0.268771	-0.454018	-0.452483	-0.465383	-0.700153	-0.705864	-0.689773	-0.94586	-0.935444	-0.913181	-1.05477	-1.06876	-1.04227	-1.62579	-1.70621	-1.68461	-2.95774	-2.97737	-3.08587
Rel_err Cy0 corrected	0.0133667	-0.000366087	-0.0471176	-0.0285742	-0.0344229	0.00336213	0.046303	0.039114	0.021137	0.00407938	-0.0318639	-0.00416173	-0.0184749	-0.0449574	-0.083443	-0.0628677	-0.0832712	-0.0593933	-0.154162	-0.163663	-0.149926	-0.182069	-0.187659	-0.176053	-0.252863	-0.330428	-0.319696	-0.61111	-0.61288	-0.62701
Block Reverse Primer (nM)	0	50	100	250	500	750	1000	2000	3750
Log_input DNA Cy0 (obs-exp)	2.53023e-05	-0.159771	-0.258668	-0.457295	-0.698596	-0.931495	-1.05526	-1.6722	-3.00699
Log_input DNA Cy0 corrected (obs-exp)	-0.0156253	0.035518	-0.0106487	-0.0489584	-0.0685107	-0.155917	-0.181927	-0.300996	-0.617
CV Cy0 corrected	0.00368582						0.00444136			0.0048124			0.00371982			0.00729732			0.00228047			0.0103521			0.0249223			0.0012124

## Sheet: Block low eff
							INPUT DNA		10000																									Averages
	10000	10000	10000	10000	10000	10000
	CONTROLS						ND1F5 500 nM ND1R2 500 nM ND1R2Block 50 nM			ND1F5 500 nM ND1R2 500 nM ND1R2Block 100 nM			ND1F5 500 nM ND1R2 500 nM ND1R2Block 250 nM			ND1F5 500 nM ND1R2 500 nM ND1R2Block 500 nM			ND1F5 500 nM ND1R2 500 nM ND1R2Block 750 nM			ND1F5 500 nM ND1R2 500 nM ND1R2Block 1000 nM			ND1F5 500 nM ND1R2 500 nM ND1R2Block 2000 nM			ND1F5 500 nM ND1R2 500 nM ND1R2Block 3750 nM						Controls	50 nM	100 nM	250 nM	500 nM	750 nM	1000 nM	2000 nM	3750 nM
Cycles	B7	B8	B9	B10	B11	B12	C1	C2	C3	C4	C5	C6	D1	D2	D3	D4	D5	D6	C7	C8	C9	C10	C11	C12	D7	D8	D9	D10	D11	D12				-0.572889	-0.443626	-0.489498	-0.540255	-0.648337	-0.5688	-0.635077	-0.835421	-1.1594
1	-0.503077	-0.555025	-0.613858	-0.60991	-0.584028	-0.571435	-0.422503	-0.455905	-0.452472	-0.512989	-0.513382	-0.442121	-0.512571	-0.548595	-0.559599	-0.660563	-0.674519	-0.60993	-0.491169	-0.592587	-0.622643	-0.654626	-0.621578	-0.629026	-0.757157	-0.801281	-0.947824	-1.21042	-1.13152	-1.13626				0.00378065	0.0102503	0.00464492	0.017017	0.0156318	0.0109231	0.00920781	0.0161142	0.00655539
2	0.0175132	-0.000723036	-0.00780604	-0.0102124	0.00254114	0.021371	0.0091097	-0.00253515	0.0241763	-0.0105738	0.00879239	0.0157162	0.013793	0.0119517	0.0253062	0.0193118	0.0118264	0.0157572	0.0187778	0.00275368	0.0112379	0.0215329	0.00885312	-0.00276255	0.0178034	0.0129804	0.0175588	0.00387031	0.00645641	0.00933944				0.00208551	0.00441498	0.00459308	0.00218695	0.00355489	0.00895452	0.00195735	0.0107119	0.00407544
3	-0.00571024	-0.0048365	0.00808902	0.0010953	0.00334142	0.010534	-0.00865363	0.0138967	0.0080019	0.00980939	-0.00654459	0.0105144	0.0135847	-0.0161112	0.0090873	0.00873767	0.00146799	0.000459011	0.0135288	0.00761591	0.00571886	-0.0061292	0.00281866	0.00918258	0.00238059	0.0178267	0.0119284	-0.00207138	0.0176414	-0.00334369				-0.00126537	0.000117251	-0.00121527	0.00871314	0.00446058	-0.0103951	-0.00707223	0.00164317	0.0135266
4	-0.00570137	0.0146869	0.00306192	0.00109959	-0.00214107	-0.0185982	0.00387571	-0.00179352	-0.00173044	0.00553282	0.00443119	-0.0136098	0.00274998	0.0293799	-0.00599045	-0.000582121	0.00247287	0.011491	-0.015639	-0.0118123	-0.00373392	0.000520754	-0.00755309	-0.0141843	0.00355028	-0.00665388	0.0080331	0.0162116	0.0076761	0.0166921				-0.00276362	-0.00377519	0.00159462	-0.0105169	-0.0112127	0.00605211	-0.00698051	-0.0198662	-0.00678008
5	-0.000903973	-0.00482877	0.00810189	0.00111017	-0.0131384	-0.00692263	0.00348166	0.00330014	-0.0181074	-0.0051743	0.00399577	0.0059624	-0.0152939	-0.00448977	-0.0117671	-0.0113984	-0.00813489	-0.0141047	0.00899796	0.0081364	0.00102199	-0.0164668	-0.00809781	0.00362312	-0.00711443	-0.0175072	-0.0349768	-0.0011687	-0.0104976	-0.0086739				-0.00183718	-0.0110073	-0.00961736	-0.0174001	-0.0124346	-0.0155347	0.00288757	-0.00860307	-0.0173773
6	-0.00519763	-0.0042986	-0.0114468	0.0069073	0.00939689	-0.00638426	-0.00781344	-0.0128681	-0.0123403	0.000405939	-0.0106748	-0.0185833	-0.0148338	-0.0207306	-0.0166359	-0.0160689	-0.00763233	-0.0136026	-0.0256655	-0.00669367	-0.0142448	0.000542412	0.00397911	0.00414119	-0.0166199	-0.00664595	-0.00254339	-0.0168418	-0.0212763	-0.014014				-0.00203772	-0.0149918	-0.0147668	-0.0154358	-0.0192465	-0.0225014	-0.00436913	-0.0190462	-0.0178129
7	-0.00446586	-0.0035515	0.00948714	-0.0131734	-0.000787109	0.00026447	-0.0195229	-0.0184251	-0.00702753	-0.00988031	-0.0308315	-0.00358865	-0.00895396	-0.0207244	-0.0166292	-0.0263892	-0.0177479	-0.0136026	-0.0156281	-0.0271243	-0.0247518	-0.010405	-0.0190539	0.0163515	-0.0216732	-0.0117676	-0.0236976	-0.0113156	-0.00967756	-0.0324457				0.00657507	-0.00834839	-0.0088	-0.014448	-0.00309173	-0.0163153	-0.0112808	-0.0229469	-0.00762401
8	0.0106493	0.00209872	0.00528688	0.00862966	2.25845e-05	0.0127633	-0.00700133	-0.0119073	-0.00613658	0.00127272	-0.0249268	-0.00274594	-0.00805225	-0.0142379	-0.021054	-0.0202386	0.00349526	0.00746819	-0.0147051	-0.0210565	-0.0131843	-0.00923233	-0.023678	-0.000932181	-0.0306325	-0.0105843	-0.0276241	-0.00956936	-0.0254575	0.0121548				-0.0038887	-0.00746417	-0.013184	-0.0151618	-0.0158057	-0.0208256	-0.00491871	-0.0189086	-0.0251402
9	-0.00425228	0.00646268	-0.0103614	0.0132965	-0.011525	-0.0169527	-0.00781999	-0.0128733	-0.00169917	-0.0253288	-0.00562719	-0.0085961	0.00277941	-0.0262972	-0.0219675	-0.016054	-0.0177586	-0.0136047	-0.0105967	-0.0271228	-0.0247573	-0.00492764	-0.00176762	-0.00806088	-0.0368239	-0.00149161	-0.0184103	-0.0278563	-0.0212689	-0.0262953				-0.00943252	-0.0156518	-0.00857521	-0.0140984	-0.0128794	-0.014335	-0.00725212	-0.0206761	-0.0305158
10	-0.0118982	0.00363335	-0.00311808	-0.0210954	-0.00935603	-0.0147608	-0.0185129	-0.0172125	-0.0112299	-0.00366694	-0.00452957	-0.0175291	0.00392217	-0.0307329	-0.0154846	-0.0148183	-0.0114447	-0.0123752	-0.0194864	-0.0105885	-0.0129301	-0.00345996	-0.0176318	-0.000664584	-0.0454889	-0.00515045	-0.0113891	-0.042209	-0.0250306	-0.0243077				0.00354546	-0.0132907	-0.0165208	-0.0288286	-0.0157697	-0.0241071	-0.0242586	-0.0309825	-0.0563074
11	-0.00743283	0.00822276	0.011659	-0.000466633	0.00685014	0.00244039	-0.0195107	-0.0239766	0.00361516	-0.0201833	-0.0257932	-0.00358575	-0.0324181	-0.0374277	-0.0166399	-0.0108951	-0.022818	-0.0135959	-0.0206351	-0.0322152	-0.0194712	-0.0213317	-0.0190014	-0.0324428	-0.036808	-0.0271687	-0.0289709	-0.044355	-0.0675902	-0.056977				-0.0282718	-0.0237052	-0.0128295	-0.0152951	-0.0239301	-0.0221535	-0.0368265	-0.0445229	-0.0460064
12	-0.0262314	-0.0205786	-0.0280416	-0.0260831	-0.036665	-0.0320311	-0.0193153	-0.023727	-0.0280734	-0.00451144	-0.0306127	-0.00336426	-0.00873634	-0.0260772	-0.0110718	-0.0158187	-0.0174998	-0.0384719	-0.0203995	-0.0268631	-0.0191978	-0.0484129	-0.0359856	-0.0260809	-0.0466169	-0.0371533	-0.0497986	-0.0439123	-0.0498038	-0.044303				-0.00306133	-0.0177363	-0.0206308	-0.027652	-0.0266455	-0.0282517	-0.022706	-0.0468592	-0.0693504
13	0.00282547	0.0140302	-0.00747005	-0.00466834	-0.00318494	-0.0199004	-0.0245617	-0.0118853	-0.0167619	-0.0193106	-0.0198611	-0.0227205	-0.0197906	-0.0421077	-0.0210576	-0.0254043	-0.0218178	-0.0327144	-0.0247169	-0.0363621	-0.0236761	-0.025623	-0.0293883	-0.0131066	-0.0659671	-0.03113	-0.0434805	-0.0812084	-0.0775777	-0.049265				-0.0189501	-0.0280049	-0.0164539	-0.01907	-0.0222695	-0.0204004	-0.025178	-0.0457924	-0.0489831
14	-0.00332636	-0.0115487	-0.0137236	-0.0268853	-0.0429533	-0.0152636	-0.0354733	-0.0220319	-0.0265096	-0.0184491	-0.0240306	-0.00688208	-0.0130308	-0.0133384	-0.0308407	-0.0140767	-0.0360465	-0.0166853	-0.0187897	-0.0302967	-0.0121148	-0.0409307	-0.0225173	-0.0120861	-0.0496944	-0.0402533	-0.0474295	-0.0464223	-0.052823	-0.0477039				-0.0155195	-0.0211879	-0.0184846	-0.0105839	-0.0126461	-0.0227437	-0.0450725	-0.0328224	-0.0501424
15	-0.0117837	-0.00509194	-0.0120335	-0.0251616	-0.0137911	-0.0252551	-0.0300237	-0.022531	-0.011009	-0.0137499	-0.0143861	-0.0273178	-0.0135097	-0.00826184	-0.00998018	-0.00944957	-0.0163105	-0.0121781	-0.019254	-0.0205554	-0.0284216	-0.0524488	-0.0518678	-0.030901	-0.03515	-0.0151738	-0.0481432	-0.041791	-0.0478327	-0.0608036				-0.00713949	-0.00181982	-0.00592464	-0.0038665	-0.0100359	-0.0164675	-0.0127697	-0.0295458	-0.0406179
16	-0.00287363	-0.000368102	-0.00716707	-0.00437532	-0.00850191	-0.0195509	-0.0175131	0.00621667	0.00583701	-0.00774286	-0.0185666	0.00853557	0.0049565	-0.00742203	-0.00913397	-0.00333729	-0.0305852	0.00381479	-0.0183447	-0.0247138	-0.00634387	-0.0403709	-0.00468123	0.00674292	-0.0492281	-0.0243459	-0.0150633	-0.0401396	-0.0347154	-0.0469986				0.0229849	0.00448106	-0.0118215	-0.0253871	-0.0331579	-0.0346665	-0.0299961	-0.0671609	-0.0945511
17	0.0209734	0.0343708	0.018605	0.0224454	0.0195379	0.0219766	-0.0124613	-0.000320046	0.0262245	-0.0137608	-0.0143945	-0.0073091	-0.0136567	-0.0363149	-0.0261898	-0.0303109	-0.036732	-0.0324308	-0.0343113	-0.0307555	-0.0389327	-0.0414739	-0.0115168	-0.0369975	-0.0807515	-0.0512918	-0.0694394	-0.0915442	-0.0943416	-0.0977676				0.0711945	0.0163984	0.00548583	-0.0141385	-0.0278489	-0.0375313	-0.0407651	-0.0617293	-0.112313
18	0.0466149	0.0610978	0.0762613	0.0772097	0.0882761	0.0777074	0.00549621	0.0223728	0.0213263	0.00210165	0.011249	0.00310688	-0.00751269	-0.0249465	-0.00995628	-0.030067	-0.0263345	-0.0271451	-0.0439143	-0.0302707	-0.0384089	-0.051846	-0.0339842	-0.036465	-0.0601866	-0.0560558	-0.0689454	-0.085347	-0.105302	-0.146289				0.113017	0.0548876	0.0336728	0.0149648	0.008502	-0.0125003	-0.0147556	-0.0489437	-0.0753596
19	0.102019	0.117993	0.114734	0.106761	0.113816	0.12278	0.0519079	0.0440432	0.0687118	0.0325141	0.025869	0.0426352	0.0268887	0.00756534	0.0104404	0.00514335	0.0132477	0.00711497	-0.00924136	-0.0103441	-0.0179154	-0.00861209	-0.0230711	-0.0125836	-0.051085	-0.0416311	-0.0541149	-0.0865861	-0.0658818	-0.073611				0.2023	0.113776	0.0857143	0.0524706	-0.000997889	-0.00946547	-0.00884679	-0.0518522	-0.0959314
20	0.18927	0.216838	0.196318	0.202178	0.214231	0.194965	0.0984857	0.115934	0.126908	0.0837138	0.081056	0.0923732	0.0494666	0.0399104	0.0680348	0.00400582	-0.00806418	0.00106469	0.0105916	-0.02082	-0.018168	-0.0198582	-0.00605875	-0.000623384	-0.0470792	-0.0375005	-0.0709769	-0.0986513	-0.0900771	-0.0990657				0.374904	0.22383	0.158349	0.109655	0.0434708	0.0250874	0.012313	-0.0372673	-0.0773064
21	0.351135	0.386705	0.361251	0.37392	0.383582	0.392828	0.221573	0.227149	0.222768	0.150747	0.156802	0.1675	0.130661	0.0943095	0.103994	0.0440153	0.0261769	0.0602203	0.0308474	0.0202668	0.0241481	0.0132774	0.00572105	0.0179406	-0.0330258	-0.0334051	-0.045371	-0.0773456	-0.0734324	-0.0811411				0.712188	0.413356	0.310961	0.206678	0.0910742	0.0651071	0.0441351	-0.0434747	-0.0911568
22	0.629575	0.689973	0.678531	0.725347	0.769794	0.779905	0.392166	0.416878	0.431023	0.300786	0.303797	0.3283	0.223487	0.192946	0.203601	0.0888151	0.0753489	0.109059	0.0819099	0.0671986	0.0462129	0.0418297	0.0471717	0.0434039	-0.0342669	-0.0448058	-0.0513515	-0.0997196	-0.068017	-0.105734				1.2736	0.777896	0.588832	0.401886	0.205434	0.131362	0.0728292	-0.0109086	-0.0811484
23	1.12086	1.21038	1.19435	1.29403	1.38979	1.43216	0.737183	0.788408	0.808098	0.567902	0.605772	0.592822	0.431297	0.377933	0.396428	0.208247	0.182504	0.225551	0.151796	0.13328	0.10901	0.0633952	0.0814291	0.0736634	-0.0232048	-0.0127584	0.00323742	-0.0813376	-0.0657857	-0.096322				2.31545	1.41616	1.04834	0.687945	0.343248	0.257173	0.185492	-0.0186814	-0.0878142
24	2.02143	2.19218	2.15011	2.35758	2.52993	2.64144	1.34514	1.43696	1.4664	1.0249	1.04829	1.07183	0.713966	0.650327	0.699542	0.325863	0.328429	0.375453	0.276532	0.260366	0.234621	0.183248	0.190221	0.183007	-0.00879025	-0.00807374	-0.0391803	-0.0978226	-0.0710891	-0.0945308				4.12736	2.54596	1.89374	1.25131	0.628287	0.47669	0.345899	0.0442715	-0.0803003
25	3.61155	3.89095	3.84945	4.21632	4.51161	4.68427	2.43884	2.59609	2.60297	1.83672	1.90392	1.94058	1.27809	1.21749	1.25834	0.629096	0.585213	0.67055	0.516716	0.484613	0.42874	0.358081	0.362612	0.317002	0.0405517	0.0578936	0.0343692	-0.070707	-0.0710731	-0.0991209				7.1596	4.47033	3.29715	2.19563	1.09174	0.819111	0.62502	0.104274	-0.0600747
26	6.26408	6.72486	6.66772	7.30823	7.84475	8.14797	4.22306	4.57665	4.61129	3.19362	3.33886	3.35896	2.248	2.13644	2.20245	1.06765	1.02002	1.18755	0.877248	0.857129	0.722954	0.620791	0.650406	0.603861	0.110997	0.11966	0.0821636	-0.0483924	-0.0471509	-0.0846809				12.0518	7.62274	5.63339	3.78517	1.87346	1.39852	1.04631	0.170412	-0.0775267
27	10.523	11.3164	11.2407	12.3538	13.1651	13.7118	7.25679	7.80357	7.80785	5.46309	5.68789	5.74918	3.87242	3.67674	3.80636	1.85516	1.77652	1.9887	1.48463	1.45051	1.26042	1.0547	1.1067	0.977534	0.183882	0.178865	0.148488	-0.0672723	-0.0668641	-0.0984437				19.0344	12.4738	9.39114	6.42771	3.17579	2.34782	1.7971	0.289866	-0.0720211
28	16.7843	17.9056	17.8868	19.5575	20.6604	21.4119	11.8455	12.8259	12.7501	9.13533	9.49621	9.54189	6.57241	6.23199	6.47874	3.15637	2.99094	3.38006	2.49979	2.43888	2.1048	1.82491	1.88225	1.68413	0.310712	0.303479	0.255408	-0.0664002	-0.0596916	-0.0899714				27.6475	19.0482	14.7722	10.4943	5.35457	3.93814	3.02102	0.515445	-0.0501218
29	24.6897	26.1972	26.3469	28.5034	29.5568	30.5913	18.0984	19.6609	19.3854	14.3929	14.9836	14.94	10.7043	10.2129	10.5657	5.3345	5.02921	5.7	4.17967	4.09387	3.54088	3.08545	3.14453	2.83309	0.530833	0.544002	0.471501	-0.0175952	-0.0547052	-0.078065				36.5976	26.4904	21.4314	16.164	8.66409	6.46706	5.00053	0.850356	-0.0445961
30	33.1208	35.0431	35.383	37.7499	38.5871	39.702	25.0305	27.4734	26.9673	20.8907	21.771	21.6326	16.428	15.7879	16.2761	8.64465	8.14627	9.20134	6.83281	6.724	5.84437	5.06326	5.24189	4.69643	0.896891	0.881991	0.772188	-0.0352211	-0.0383233	-0.060244				44.1022	33.5617	28.4816	23.0027	13.5076	10.2564	8.06849	1.36221	-0.0500874
31	40.4951	42.4123	43.1099	45.6385	45.8694	47.0883	31.6255	34.939	34.1207	27.8695	28.9839	28.5915	23.2112	22.5802	23.2169	13.4813	12.774	14.2674	10.8073	10.6775	9.28431	8.16462	8.40549	7.63536	1.42396	1.40991	1.25277	-0.0310269	-0.0336693	-0.0855659				50.1811	39.4044	34.6611	29.9795	19.7354	15.5339	12.6125	2.25048	0.0135731
32	46.431	48.4491	49.505	51.9876	51.7716	52.9421	37.0132	41.0787	40.1213	34.0492	35.2969	34.6373	30.0444	29.5646	30.3296	19.6943	18.8363	20.6755	16.2149	16.1188	14.2679	12.7321	13.1456	11.9599	2.33657	2.33029	2.0846	0.0415471	0.00847672	-0.00930451				54.9576	44.0159	39.7526	36.0942	26.7113	21.938	18.6411	3.5804	0.0541165
33	51.1294	53.276	54.5375	56.9024	56.3474	57.5531	41.2997	46.0383	44.7098	39.1327	40.5018	39.6233	35.9633	35.7713	36.548	26.6352	25.7227	27.7761	22.5942	22.7418	20.4779	18.8059	19.4232	17.6941	3.71567	3.69952	3.32599	0.0492476	0.0692834	0.0438187				58.613	47.6855	43.7145	41.0541	33.4595	28.6731	25.6291	5.68079	0.16485
34	54.7745	57.0059	58.3797	60.6406	59.853	61.0246	44.62	49.9881	48.4486	43.1153	44.5634	43.4649	40.7308	40.7967	41.6346	33.4367	32.4927	34.4492	29.119	29.6296	27.2706	25.8801	26.66	24.3473	5.9295	5.84056	5.2723	0.172623	0.188074	0.133854				61.646	50.5396	46.9105	44.9402	39.2358	34.7616	32.5973	8.71633	0.287977
35	57.84	60.0484	61.544	63.7988	62.752	63.8928	47.2714	53.0134	51.3342	46.3141	47.8773	46.5401	44.4759	44.7458	45.599	39.1943	38.3361	40.1769	34.9218	35.793	33.57	32.9994	33.8574	30.9351	9.03691	8.96248	8.1496	0.272831	0.300298	0.290804				64.1214	52.8173	49.4226	48.0486	44.0401	39.876	38.8008	12.9217	0.48386
36	60.2884	62.5557	64.1871	66.3249	65.118	66.254	49.3294	55.5237	53.5989	48.7534	50.5172	48.9973	47.4562	47.9406	48.7491	43.9728	43.2659	44.8814	39.6638	40.9793	38.9849	39.3012	40.2126	36.8885	13.3026	13.2163	12.2463	0.481902	0.498451	0.471226				66.0907	54.708	51.4363	50.562	47.8355	43.9347	43.7893	18.1894	0.774459
37	62.2678	64.5447	66.1955	68.4744	66.9673	68.0948	51.1398	57.4775	55.5066	50.7387	52.5363	51.034	49.8529	50.4479	51.3852	47.8339	47.1398	48.5328	43.534	45.0946	43.1755	44.3986	45.3419	41.6275	18.5582	18.5183	17.4919	0.763354	0.784583	0.775439				67.7643	56.3238	53.145	52.5145	50.9034	47.1796	47.9254	24.118	1.25445
38	63.9196	66.3044	68.0434	70.1463	68.4574	69.7149	52.6547	59.1311	57.1857	52.5264	54.2785	52.6301	51.7997	52.4253	53.3186	50.9207	50.3011	51.4883	46.5189	48.3356	46.6842	48.6379	49.504	45.6345	24.3953	24.3752	23.5836	1.22056	1.24946	1.29332				69.1549	57.5864	54.6287	54.2173	53.3419	49.7796	51.111	30.0892	1.93522
39	65.3833	67.686	69.4463	71.6021	69.8887	70.9228	53.7703	60.5642	58.4247	53.9924	55.7703	54.1234	53.3822	54.2011	55.0685	53.329	52.8178	53.879	49.0016	50.9428	49.3942	51.9477	52.8449	48.5403	30.1118	30.1557	30	1.85294	1.93356	2.01916				70.371	58.7447	55.8084	55.5923	55.4117	51.9092	53.7622	35.5933	2.99158
40	66.5583	68.9898	70.7033	72.848	70.9984	72.1283	54.8444	61.7745	59.6153	55.1193	57.0445	55.2616	54.7292	55.6286	56.4189	55.423	54.8944	55.9178	50.9797	53.0923	51.6555	54.6693	55.5342	51.0831	35.2599	35.4764	36.0435	2.87918	2.99125	3.10432				71.242	59.7252	56.8254	56.8162	57.151	53.6553	55.7175	40.1304	4.44274
41	67.4563	69.9228	71.7655	73.7127	71.8099	72.7851	55.735	62.8794	60.5612	56.1791	58.1072	56.1899	55.9158	56.8599	57.673	57.0406	56.6768	57.7355	52.711	54.7916	53.4633	56.7656	57.4906	52.8962	39.4635	39.8102	41.1176	4.29872	4.43296	4.59654				72.2881	60.5843	57.7176	57.8728	58.5626	55.1234	57.5132	43.9378	6.58517
42	68.4099	70.9228	72.7652	74.7326	72.9309	73.9674	56.5834	63.7627	61.4069	57.0435	59.0852	57.0241	57.0424	57.8623	58.7136	58.6071	58.0544	59.0264	54.106	56.2666	54.9975	58.5824	59.3601	54.5972	43.0385	43.3961	45.3788	6.34348	6.57781	6.83422				73.0432	61.226	58.4355	58.6554	59.8624	56.2849	58.9574	47.0739	9.43764
43	69.2601	71.641	73.6009	75.5345	73.5365	74.686	57.2819	64.2887	62.1073	57.8661	59.7233	57.7172	57.7013	58.7038	59.5613	59.8515	59.4204	60.3153	55.1893	57.4703	56.1953	60.1085	60.8038	55.9599	45.874	46.4305	48.9172	9.10655	9.41973	9.78665				73.7321	61.8213	59.138	59.4486	60.9217	57.4336	60.2108	49.6107	13.1791
44	69.9536	72.3228	74.2576	76.3284	74.3083	75.2221	57.7208	65.0884	62.6547	58.5039	60.4588	58.4512	58.5054	59.5001	60.3402	60.9574	60.4582	61.3496	56.3886	58.5981	57.3142	61.3606	62.0683	57.2035	48.2674	48.7527	51.812	12.7773	13.1574	13.6026				74.2858	62.3751	59.7208	60.0874	61.822	58.2906	61.2862	51.6888	17.5819
45	70.4881	72.9597	74.8278	76.8699	74.7296	75.8394	58.264	65.5508	63.3105	59.0297	61.0755	59.0571	59.1618	60.1351	60.9654	61.8791	61.331	62.2558	57.1822	59.4977	58.1919	62.4715	63.2411	58.1459	50.145	50.771	54.1505	17.1491	17.5327	18.0638				74.6941	62.821	60.1933	60.6547	62.6555	59.0638	62.2238	53.383	22.4709
46	70.969	73.4102	75.3676	77.3109	75.0535	76.0532	58.6974	66.0619	63.7039	59.5495	61.5339	59.4966	59.7078	60.7145	61.5417	62.6648	62.1818	63.1198	57.8898	60.2532	59.0484	63.4828	64.1715	59.0171	51.7764	52.3435	56.0289	22.1672	22.4485	22.7969				75.1898	63.1961	60.5602	61.1211	63.2695	59.715	62.9743	54.8023	27.5064
47	71.4321	73.8522	75.8129	77.7481	75.695	76.5982	58.9612	66.4611	64.166	59.8731	61.9718	59.8356	60.0955	61.1767	62.091	63.217	62.88	63.7115	58.4716	60.9215	59.7521	64.2579	64.9288	59.7362	53.0845	53.6643	57.6582	27.3868	27.3903	27.7423				75.566	63.6004	61.0448	61.5671	63.9544	60.3426	63.6472	56.04	32.2331
48	71.8802	74.2346	76.2068	78.1533	75.9397	76.9816	59.4004	66.8999	64.5008	60.4342	62.4151	60.2852	60.6297	61.6446	62.427	63.951	63.5027	64.4097	59.1543	61.5596	60.314	64.968	65.6348	60.3388	54.251	54.841	59.0281	32.3882	32.1375	32.1737				75.9007	63.9151	61.3694	61.952	64.5076	60.8571	64.2887	57.1212	36.4874
49	72.1318	74.5593	76.5412	78.4752	76.3163	77.3805	59.6398	67.2735	64.8319	60.7026	62.7745	60.6312	60.9228	62.0517	62.8816	64.573	64.0159	64.934	59.5868	62.1073	60.877	65.6468	66.2786	60.9409	55.2867	55.8845	60.1926	36.9671	36.3066	36.1884				76.2605	64.2	61.6712	62.2442	64.9656	61.3491	64.8338	57.9806	40.0232
50	72.5183	74.9479	76.997	78.934	76.5328	77.6333	59.9511	67.5212	65.1275	61.0407	63.0239	60.949	61.2462	62.3183	63.1681	65.0045	64.5448	65.3477	60.0922	62.5698	61.3853	66.1635	66.8109	61.5269	56.0536	56.6443	61.2438	40.7659	39.8137	39.49
Fmax	53.5826	54.5902	56.1754	59.1906	57.8027	59.1754	45.9735	51.3276	50.4752	45.9068	46.8182	45.5023	46.9375	47.7125	48.3058	50.8811	49.8661	51.3595	46.5781	48.1428	49.2861	52.3017	52.9571	49.2748	47.7053	48.6467	52.9564	51.549	49.4638	48.6673
B	1.51134	1.44886	1.46185	1.51941	1.50982	1.52495	1.6069	1.59069	1.63812	1.59217	1.54741	1.55008	1.63437	1.63499	1.62225	1.79538	1.74089	1.7947	1.69304	1.64945	1.77925	1.7432	1.73137	1.77987	2.00709	2.03812	2.05547	2.53083	2.55776	2.61323
C	29.4934	29.4747	29.5184	29.3166	29.1222	29.0498	29.7669	29.8633	29.7999	30.4521	30.4566	30.3899	31.1611	31.318	31.2895	32.8123	32.9932	32.6925	33.3155	33.4827	33.7008	34.2182	34.1591	34.1197	37.9077	37.9306	38.3833	46.3168	45.9676	45.6241
D	0.889342	0.839691	0.851751	0.908704	0.909006	0.927165	0.973572	0.959213	0.989941	0.928461	0.896424	0.897971	0.945976	0.9398	0.930287	1.0044	0.955629	1.00553	0.913501	0.880331	0.965919	0.926825	0.926272	0.969654	0.997298	1.01965	1.01955	1.11013	1.14798	1.20735
Fb	-0.0320808	-0.032807	-0.0384188	-0.0394152	-0.0398139	-0.0403495	-0.0342891	-0.0344747	-0.0286739	-0.0369551	-0.0419076	-0.0319764	-0.0313186	-0.0450941	-0.040947	-0.0432869	-0.0473344	-0.0385032	-0.0377248	-0.0488945	-0.0439524	-0.0521535	-0.0460705	-0.0379626	-0.0621203	-0.0520048	-0.067446	-0.088758	-0.0840829	-0.0960489
x flex	29.3162	29.2216	29.2839	29.1711	28.9781	28.9344	29.7238	29.7971	29.7833	30.334	30.2874	30.2231	31.0703	31.2165	31.1723	32.8202	32.9142	32.7024	33.1624	33.2725	33.6391	34.0858	34.0265	34.0649	37.9023	37.9702	38.4231	46.5812	46.3206	46.1165
y flex	27.3833	28.2222	28.9534	30.1158	29.4064	29.9874	23.0722	25.8378	25.2583	23.2515	23.8746	23.2044	23.6926	24.1016	24.455	25.3757	25.1067	25.6139	23.6672	24.6333	24.7655	26.4896	26.8315	24.7472	23.803	24.1803	26.3122	25.179	24.0109	23.393
slope (m)	8.53864	8.90106	9.12229	9.44871	9.28676	9.4734	7.09346	7.96313	7.67929	7.04211	7.30584	7.09231	7.0563	7.15518	7.2773	7.09455	7.06055	7.16642	6.68425	7.00579	6.85104	7.32383	7.46484	6.85537	5.93716	6.00263	6.47905	5.25252	5.03466	4.91642
Cy0	26.1054	26.0472	26.1057	25.9797	25.8074	25.7647	26.4664	26.5481	26.4904	27.0269	27.0138	26.9468	27.7082	27.8418	27.8062	29.2373	29.3516	29.1229	29.616	29.7494	30.0178	30.4617	30.426	30.4494	33.8827	33.9333	34.3516	41.7706	41.5347	41.3388
Cy0 corrected	26.1771	26.4667	26.5399	26.3649	26.3238	26.3207	25.8912	26.2182	25.7694	26.06	26.3628	26.2195	26.3048	26.3751	26.4275	26.1639	26.4047	26.0953	26.6638	27.0385	26.5426	27.0307	27.1892	26.9629	26.9529	26.8894	27.1377	27.8875	27.7964	27.6866
m calibration curve	8.60603						8.60603
y flex calibration curve	27.6943						27.6943
SOD probability							0.0172451	0.453912	0.132566	0.0220672	0.0919496	0.0308946	0.0102343	0.014683	0.0262708	0.000133848	0.000270735	0.000169334	6.01954e-05	0.000411099	9.71503e-06	5.26679e-05	0.000150861	1.21643e-05	1.62859e-13	9.71008e-14	4.37287e-14	1.85729e-27	1.23204e-26	2.40028e-26
Log_input DNA Cy0	3.9763	3.99106	3.97623	4.0082	4.05191	4.06272	3.88475	3.86403	3.87865	3.74257	3.74589	3.76288	3.56977	3.53588	3.54491	3.18191	3.15293	3.21093	3.08586	3.05203	2.98394	2.87134	2.88041	2.87446	2.00363	1.9908	1.88469	0.0028846	0.0627185	0.11241
Log_input DNA Cy0 corrected	3.95813	3.88467	3.86609	3.91048	3.92091	3.9217	4.03064	3.94769	4.06154	3.98784	3.91102	3.94737	3.92573	3.9079	3.89461	3.96146	3.90041	3.97887	3.83468	3.73962	3.86543	3.74161	3.70141	3.75882	3.76136	3.77745	3.71447	3.5243	3.5474	3.57524
intecept calibration curve	41.782
slope calibration curve	-3.9425
Rel_err Cy0	-0.0237022	-0.00894046	-0.0237734	0.00819955	0.051906	0.0627175	-0.115253	-0.13597	-0.121347	-0.257433	-0.25411	-0.237116	-0.430234	-0.464118	-0.455088	-0.818087	-0.847066	-0.789067	-0.914139	-0.947969	-1.01606	-1.12866	-1.11959	-1.12554	-1.99637	-2.0092	-2.11531	-3.99712	-3.93728	-3.88759
Rel_err Cy0 corr Emax	-0.0418725	-0.115333	-0.133912	-0.0895185	-0.0790915	-0.0782992	0.0306441	-0.0523064	0.0615427	-0.0121636	-0.0889796	-0.0526319	-0.0742682	-0.0921004	-0.105389	-0.0385366	-0.0995945	-0.0211348	-0.165318	-0.260376	-0.134575	-0.25839	-0.298586	-0.241182	-0.238643	-0.222552	-0.285532	-0.475704	-0.452597	-0.424756
Block Reverse Primer (nM)	0	50	100	250	500	750	1000	2000	3750
Log_input DNA Cy0 (obs-exp)	0.0110678	-0.12419	-0.249553	-0.449813	-0.818073	-0.959388	-1.12459	-2.04029	-3.94066
Log_input DNA Cy0 corrected (obs-exp)	-0.089671	0.0132934	-0.0512584	-0.0905857	-0.0530886	-0.186756	-0.266053	-0.248909	-0.451019
CV Cy0 corrected							0.00858544			0.00508993			0.00519049			0.0131129			0.00921431			0.00428666			0.0163746			0.00361906

## Sheet: competition high-low eff
									INPUT DNA		40000																													Averages
	ND1F2 500 nM ND1R2 500 nM				ND1F5 125 nM ND1F2 375 nM ND1R2 500 nM				ND1F5 250 nM ND1F2 250 nM ND1R2 500 nM				ND1F5 300 nM ND1F2 200 nM ND1R2 500 nM				ND1F5 350 nM ND1F2 150 nM ND1R2 500 nM				ND1F5 375 nM ND1F2 125 nM ND1R2 500 nM				ND1F5 400 nM ND1F2 100 nM ND1R2 500 nM				ND1F5 450 nM ND1F2 50 nM ND1R2 500 nM				ND1F5 500 nM ND1R2 500 nM							ND1F2 500 nM	ND1F5 125 nM ND1F2 375 nM	ND1F5 250 nM ND1F2 250 nM	ND1F5 300 nM ND1F2 200 nM	ND1F5 350 nM ND1F2 150 nM	ND1F5 375 nM ND1F2 125 nM	ND1F5 400 nM ND1F2 100 nM	ND1F5 450 nM ND1F2 50 nM	ND1F5 500 nM ND1R2
	G1	G2	G3	G4	G5	G6	G7	G8	E1	E2	E3	E4	E5	E6	E7	E8	E9	E10	E11	E12	H1	H2	H3	H4	F1	F2	F3	F4	F5	F6	F7	F8	F9	F10	F11	F12				0.0496582	-0.241581	-0.331006	-0.382576	-0.43708	-0.416416	-0.379793	-0.42681	-0.511049
1	0.0396225	0.0518729	0.0563643	0.050773	-0.267042	-0.239377	-0.209089	-0.250815	-0.292265	-0.302134	-0.355232	-0.374395	-0.399831	-0.382672	-0.353056	-0.394745	-0.45466	-0.459972	-0.423869	-0.40982	-0.357623	-0.359654	-0.397473	-0.550913	-0.33973	-0.350219	-0.388598	-0.440626	-0.469853	-0.427361	-0.379893	-0.430133	-0.521432	-0.526719	-0.490307	-0.505738				0.050226	0.00569617	0.012613	0.00670518	0.00163544	0.0146867	-0.338239	-0.470614	-0.334001
2	0.0397891	0.0527677	0.0564086	0.0519383	0.0091299	-0.00422693	0.0117073	0.00617441	0.0198912	0.00539097	0.020218	0.00495179	0.0181797	-0.00330716	0.00282419	0.00912399	0.00938337	-0.0158852	0.00210067	0.0109429	0.0135909	0.0253718	0.0156162	0.00416805	-0.336083	-0.339597	-0.339343	-0.337934	-0.456467	-0.468061	-0.475302	-0.482626	-0.336375	-0.332981	-0.332665	-0.333981				0.0498393	-0.00355251	0.00111745	0.00138246	0.00138279	0.0110558	-0.289892	-0.336362	-0.251884
3	0.0392173	0.0542162	0.0558278	0.0500959	0.00203835	0.0122919	-0.0153302	-0.01321	-0.0098418	0.0108751	0.00388028	-0.000443775	0.00264068	0.00159614	-0.00245489	0.0037479	-0.00153954	0.000640475	0.00189662	0.00453359	0.00521861	0.012964	0.0123952	0.0136453	-0.270559	-0.302068	-0.299787	-0.287153	-0.329354	-0.335097	-0.338684	-0.342311	-0.273178	-0.242744	-0.239905	-0.251709				0.0513265	-0.00246093	-0.000968073	0.00591223	-0.00232711	-0.00310967	0.0232105	-0.271338	0.0216673
4	0.0415765	0.0536566	0.0563459	0.053727	-0.0098397	-0.0034502	0.000522962	0.00292323	-0.00324539	-0.00532169	-0.00611491	0.0108097	-0.0017044	0.0125427	0.018726	-0.00591535	-0.00605682	0.0014951	0.00857353	-0.0133203	-0.00873128	-0.000342213	-0.000410919	-0.00295426	0.0224255	0.0237048	0.0236122	0.0230993	-0.240472	-0.265769	-0.281566	-0.297545	0.0225319	0.0212962	0.021181	0.0216602				0.0521082	0.00445117	-0.00932662	-0.0110788	-0.00246406	-0.0115785	0.00964259	0.0224694	0.00727325
5	0.0425685	0.0539131	0.0580178	0.0539335	0.00309288	-0.00250313	0.00930263	0.00791231	-0.0094884	-0.00563948	-0.00648966	-0.015689	-0.017428	-0.0081546	-0.00206703	-0.0166657	-0.00645188	0.00107999	-0.00942241	0.00493805	-0.007595	-0.0169973	-0.0119251	-0.00979662	0.00843741	0.0104016	0.0102594	0.00947188	0.0209891	0.0222023	0.0229599	0.0237262	0.00860069	0.00670348	0.0065265	0.00726233				0.0518517	-0.00413391	-0.00343577	-0.00292102	0.00177295	-0.0110543	-0.00977404	0.00848452	-0.00938827
6	0.0420953	0.0543321	0.0583434	0.052636	-0.00442143	-0.00211161	-0.00620267	-0.00379991	0.00268436	-0.00530491	-0.0114938	0.000371234	-0.00168793	-0.00267705	-0.0170283	0.00970917	0.00466487	0.0126696	-0.0031484	-0.00709431	-0.00248324	-0.0209962	-0.0156754	-0.00506249	-0.00957782	-0.00989762	-0.00987447	-0.00974624	0.0065874	0.00814223	0.00911318	0.0100953	-0.0096044	-0.00929551	-0.00926669	-0.00938649				0.0528108	-0.000771351	-0.0173816	-0.000403068	-0.00352849	-0.00853234	-0.0071418	-0.00957794	-0.00870879
7	0.0396629	0.0576684	0.0589206	0.0549912	-3.8846e-05	-0.00172856	0.00207841	-0.00339641	-0.0209855	-0.0165414	-0.0114831	-0.0205162	0.00344093	-0.00777236	0.00341398	-0.000694823	-0.00603212	-0.00406113	-0.00314612	-0.000874609	-0.00668081	-0.0161158	-0.0151651	0.00383232	-0.00793886	-0.0066398	-0.00673384	-0.0072547	-0.00940951	-0.00954755	-0.00963375	-0.00972094	-0.00783087	-0.00908561	-0.00920266	-0.00871602				0.0514215	0.00172491	-0.0100132	0.00418715	0.00297746	-0.0220526	-0.0193096	-0.00791732	-0.0171393
8	0.0406514	0.0523069	0.0569093	0.0558183	0.00456017	0.0106585	0.00258333	-0.0109024	-0.0143912	-0.0215026	-0.00532306	0.00116394	0.00933339	-0.00699755	0.0143781	3.46804e-05	0.000160552	0.00796898	-0.00234404	0.00612437	-0.024616	-0.0287715	-0.022923	-0.0118999	-0.0182057	-0.0200049	-0.0198746	-0.0191532	-0.00899317	-0.00811143	-0.00756081	-0.00700386	-0.0183552	-0.0166174	-0.0164553	-0.0171293				0.0547179	-0.000159615	-0.0174799	0.00468336	0.00618755	-0.0133989	-0.00238256	-0.0182366	-0.00517593
9	0.0407428	0.0608026	0.0641703	0.0531558	0.000600057	-0.00114908	-0.00533893	0.0052495	-0.020983	-0.022156	-0.011484	-0.0152966	0.00344093	0.00747863	0.00852058	-0.00070672	0.0046696	0.0182501	0.00271195	-0.000881472	-0.0199608	-0.0243371	-0.00154829	-0.00774949	-0.00380342	-0.00148767	-0.00165531	-0.00258383	-0.0167267	-0.0179641	-0.0187369	-0.0195185	-0.00361093	-0.00584767	-0.00605632	-0.00518881				0.0563385	-0.00261358	-0.00026009	0.00179732	-0.00831249	-0.0145871	-0.0244994	-0.00375894	-0.0218423
10	0.050498	0.0570314	0.0585278	0.0592967	0.00122254	-0.000581078	-0.00481978	-0.00627601	-0.0142472	0.00114545	0.000247514	0.0118138	-0.00584865	0.00337329	0.00944851	0.000216146	-0.00499327	-0.0141429	-0.00800352	-0.00611024	-0.00530739	-0.0325701	-0.0135984	-0.00687263	-0.0231479	-0.0253507	-0.0251912	-0.024308	-0.00578994	-0.00412539	-0.00308592	-0.00203452	-0.023331	-0.0212033	-0.0210049	-0.0218301				0.0577415	0.01089	-0.00546923	-0.00297844	-0.00774687	-0.0056451	-0.0019549	-0.0232117	-0.000199307
11	0.0468803	0.0592898	0.0626064	0.0621893	0.0256432	0.00392476	0.00759132	0.00640056	-0.0209749	-0.016542	0.010059	0.00558093	0.00343437	-0.00776763	-0.00169154	-0.00588897	-0.0167442	-0.00404206	-0.00312385	-0.00707738	-0.0186102	-0.0230323	0.00427836	0.0147837	-0.00106191	-0.00251732	-0.00241196	-0.00182841	-0.0208798	-0.022791	-0.0239844	-0.0251916	-0.00118289	0.000222869	0.000354007	-0.000191215				0.0615497	0.0222101	0.0117749	0.0113686	-0.00507611	0.000774085	0.0118628	-0.00108869	0.00995841
12	0.0496067	0.0655488	0.0676573	0.0633861	0.0340086	0.0121991	0.0277774	0.0148555	0.00875606	0.0117107	0.0156312	0.0110015	0.00874966	0.00259531	0.0138227	0.0203069	-0.000457267	-0.00383144	-0.00292079	-0.0130949	0.000474396	-0.00482301	-0.00376705	0.011212	0.0108941	0.0124729	0.0123586	0.0117256	0.000165876	-0.000862332	-0.00150442	-0.00215388	0.0110253	0.00950046	0.00935821	0.00994964				0.0739819	0.0456867	0.0232071	0.0234181	0.0141618	0.0101691	-0.00359881	0.0109299	-0.00287779
13	0.0647316	0.0811456	0.0793724	0.0706779	0.041493	0.0512283	0.0432586	0.0467668	0.0151809	0.0178275	0.0377774	0.0220425	0.0195681	0.0133348	0.0399289	0.0208407	0.0216055	0.0191448	0.0035384	0.0123587	0.00465736	0.0213923	-0.00430284	0.0189297	-0.00323206	-0.0038298	-0.00378653	-0.00354686	0.00944347	0.0106617	0.0114225	0.012192	-0.00328174	-0.0027044	-0.00265054	-0.00287446				0.0923407	0.0957692	0.0582633	0.0536525	0.0450118	0.0500727	0.00266787	-0.0032515	0.00356806
14	0.0864604	0.0961296	0.0967916	0.089981	0.106471	0.0920216	0.0960652	0.0885192	0.0513615	0.0409567	0.0708888	0.069846	0.0613145	0.0497036	0.0559963	0.0475957	0.0438757	0.0534726	0.0571333	0.0255657	0.0481941	0.0406927	0.0488401	0.0625639	0.00312576	0.00237949	0.00243351	0.00273273	-0.00257916	-0.00313019	-0.0034743	-0.00382235	0.00306372	0.00378453	0.00385177	0.00357221				0.144382	0.184528	0.111797	0.108393	0.0966923	0.104776	0.0110037	0.00309418	0.013583
15	0.136564	0.144868	0.153674	0.142422	0.189982	0.186861	0.171592	0.189678	0.104251	0.0967922	0.129742	0.116401	0.112094	0.0950246	0.122036	0.104418	0.0970205	0.103247	0.0742814	0.112221	0.0903287	0.0986527	0.113231	0.11689	0.0123157	0.0101773	0.0103321	0.0111895	0.00406948	0.00327015	0.00277099	0.00226609	0.0121379	0.0142033	0.014396	0.0135949				0.244231	0.349507	0.246521	0.241312	0.215037	0.207599	0.0344116	0.012232	0.0404461
16	0.238975	0.24927	0.247876	0.240803	0.373455	0.353362	0.323125	0.348085	0.24109	0.221124	0.276072	0.247798	0.24093	0.238193	0.235236	0.250888	0.210412	0.221315	0.215903	0.212519	0.203113	0.188408	0.212657	0.22622	0.0374811	0.0324783	0.0328405	0.0348464	0.0148999	0.0127134	0.0113479	0.00996675	0.0370652	0.0418972	0.042348	0.0404739				0.48097	0.674601	0.495084	0.445547	0.384316	0.393194	0.0861928	0.0373279	0.0918306
17	0.476446	0.502873	0.484187	0.460373	0.71847	0.684473	0.628449	0.667012	0.476975	0.456347	0.533804	0.513208	0.444813	0.430425	0.459243	0.447708	0.380946	0.404496	0.390973	0.360848	0.356567	0.348037	0.42189	0.446284	0.0890605	0.0843867	0.084725	0.086599	0.0427778	0.0383112	0.0355219	0.0327005	0.088672	0.0931864	0.0936075	0.0918566				0.993891	1.31705	0.957996	0.872917	0.745801	0.771961	0.139333	0.0888494	0.158144
18	0.999992	1.02553	1.01791	0.932139	1.42055	1.31523	1.21935	1.31307	0.897511	0.889434	1.03002	1.01502	0.875342	0.868018	0.873579	0.87473	0.740425	0.784418	0.755094	0.703265	0.728949	0.707525	0.806336	0.845034	0.148901	0.133307	0.134436	0.140689	0.0952057	0.0899962	0.0867431	0.0834526	0.147605	0.162667	0.164073	0.158231				2.09904	2.54132	1.85057	1.68767	1.43145	1.45037	0.304574	0.148369	0.333039
19	2.13713	2.15915	2.12555	1.97432	2.72709	2.55038	2.35826	2.52956	1.743	1.74851	1.97223	1.93854	1.67843	1.69072	1.67514	1.70639	1.42555	1.50906	1.41713	1.37405	1.38492	1.3107	1.51605	1.5898	0.319053	0.295455	0.297164	0.306625	0.166375	0.151618	0.142403	0.133082	0.317091	0.339883	0.34201	0.33317				4.37408	4.85544	3.52692	3.21248	2.67472	2.72874	0.559347	0.31818	0.615865
20	4.45968	4.50216	4.4158	4.11867	5.2261	4.88834	4.47607	4.83125	3.34582	3.30986	3.73879	3.71319	3.18288	3.26058	3.18181	3.22466	2.66792	2.78606	2.67159	2.57331	2.5948	2.48197	2.86138	2.97683	0.588095	0.541242	0.544633	0.56342	0.346681	0.323322	0.308735	0.293981	0.584201	0.629456	0.633677	0.616125				8.75591	9.08778	6.59299	5.95743	4.95022	5.03018	1.0618	0.586411	1.16431
21	8.95738	9.00015	8.81857	8.24755	9.78795	9.13831	8.38212	9.04274	6.23929	6.19804	7.02035	6.91425	5.93732	6.00525	5.90538	5.98177	4.93973	5.15184	4.94136	4.76796	4.80838	4.58794	5.24367	5.48071	1.11394	1.02896	1.03511	1.06918	0.642095	0.596458	0.567959	0.539132	1.10688	1.18896	1.19662	1.16478				16.2447	16.2814	11.8447	10.7267	8.94079	9.02135	1.9709	1.11092	2.15048
22	16.6251	16.7063	16.366	15.2812	17.4858	16.4024	15.0699	16.1675	11.2254	11.1129	12.6287	12.4121	10.6564	10.8428	10.6102	10.7975	8.85965	9.35118	8.93281	8.61953	8.62244	8.24202	9.42468	9.79627	2.06225	1.91337	1.92415	1.98384	1.21132	1.12903	1.07764	1.02567	2.04987	2.19366	2.20708	2.15131				27.0814	27.2802	20.1206	18.2812	15.3047	15.5118	3.56401	2.05694	3.88021
23	27.7423	27.8375	27.2964	25.4492	29.3401	27.4822	25.2272	27.0712	19.0355	18.9453	21.4166	21.0851	18.187	18.5123	18.0803	18.3452	15.2191	15.9736	15.2958	14.7304	14.8485	14.2002	16.144	16.8546	3.72485	3.46272	3.48169	3.5868	2.23298	2.0887	1.99861	1.90747	3.70306	3.95625	3.97987	3.88167				39.8237	41.1223	31.035	28.612	24.3246	24.9997	6.35358	3.71573	6.86602
24	40.8155	40.8846	40.1918	37.403	44.1311	41.4712	38.0144	40.8726	29.3855	29.1781	33.0715	32.505	28.478	29.0134	28.2747	28.682	24.1896	25.3707	24.2767	23.4614	23.7848	22.8451	26.095	27.2738	6.61423	6.18942	6.22017	6.3905	4.02157	3.77091	3.61439	3.45606	6.57892	6.98924	7.02752	6.86838				51.7886	54.4279	42.7136	40.071	35.0242	36.7058	10.8457	6.59987	11.5945
25	53.0678	53.1683	52.3134	48.6048	58.4349	54.8931	50.3468	54.0369	40.3501	40.1572	45.6036	44.7436	39.8638	40.6979	39.6332	40.0892	34.9062	36.5467	35.0102	33.6337	34.8044	33.4857	38.2843	40.2487	11.2266	10.6058	10.6507	10.8996	7.08788	6.68792	6.43815	6.18552	11.175	11.7746	11.8305	11.598				61.0287	64.187	52.1525	49.9422	45.034	48.442	17.3526	11.2064	18.2836
26	62.5139	62.6706	61.6646	57.2656	68.8774	64.6563	59.4588	63.7555	49.2994	49.0313	55.6919	54.5876	49.7209	50.758	49.4303	49.8596	44.9441	47.1274	44.8535	43.211	45.7418	44.2085	50.3832	53.4344	17.8262	17.0543	17.1102	17.4197	11.9043	11.3323	10.9751	10.6139	17.762	18.5075	18.5771	18.2879				67.1638	70.1909	58.285	56.76	52.5566	58.0152	25.3762	17.802	26.3439
27	68.7847	68.9849	67.8815	63.0041	75.1888	70.8351	65.0608	69.6789	55.1093	54.8014	62.2792	60.9503	56.4963	57.6929	56.264	56.5869	52.4938	55.0332	52.4231	50.2763	54.583	52.8615	60.3834	64.233	25.8684	25.0661	25.1242	25.4459	18.652	17.9554	17.5204	17.0804	25.8017	26.5766	26.6489	26.3483				70.8725	73.6552	61.9211	60.8271	57.4879	64.8356	33.6574	25.8442	34.4971
28	72.5538	72.8032	71.642	66.4909	78.9365	74.2355	68.3719	73.077	58.5413	58.1541	66.1803	64.8088	60.4648	61.9167	60.2917	60.6352	57.3788	60.1472	57.2908	55.1347	60.874	59.0654	67.4722	71.9308	34.0845	33.3883	33.4387	33.7179	26.7121	26.0008	25.5565	25.1072	34.0266	34.699	34.7618	34.501				72.9794	75.7325	63.9977	63.1371	60.2795	69.0208	40.8084	34.064	41.4374
29	74.7016	74.9832	73.7753	68.4575	81.12	76.3976	70.2544	75.1579	60.5608	60.083	68.3454	67.0015	62.7364	64.33	62.5902	62.8916	60.1788	63.046	60.0902	57.8029	64.7431	62.844	71.7887	76.7074	41.1284	40.6069	40.6446	40.8537	34.8078	34.1982	33.8175	33.4324	41.085	41.5887	41.6357	41.4403				74.1241	76.9215	65.1076	64.3602	61.8891	71.4568	46.1505	41.1132	46.5805
30	75.8738	76.1556	74.9367	69.5302	82.4045	77.5521	71.374	76.3552	61.6344	61.0907	69.5456	68.1598	64.0045	65.5994	63.7597	64.077	61.769	64.7352	61.7418	59.3106	67.0019	65.0691	74.3066	79.4497	46.3692	46.0127	46.0385	46.1814	41.6665	41.213	40.9298	40.6433	46.3396	46.6839	46.716	46.5825				74.7478	77.6755	65.7251	65.049	62.7266	72.8727	49.7909	46.359	50.0522
31	76.4864	76.818	75.5602	70.1266	83.2172	78.3109	72.0995	77.0744	62.1753	61.6545	70.2122	68.8585	64.658	66.2843	64.48	64.774	62.6684	65.6775	62.5435	60.0168	68.3035	66.3326	75.7865	81.0682	49.9238	49.7072	49.7228	49.8097	46.7342	46.4267	46.2346	46.0404	49.9058	50.115	50.1346	50.0534				75.0779	78.0877	66.0528	65.4169	63.2741	73.8048	52.0066	49.9175	52.1748
32	76.8352	77.1521	75.9028	70.4216	83.6102	78.767	72.4154	77.5583	62.4687	61.9875	70.5758	69.1792	65.0908	66.6372	64.8322	65.1073	63.2382	66.1927	62.988	60.6774	69.1102	67.2358	76.7696	82.1037	52.0922	51.9527	51.9628	52.0187	50.1465	49.9588	49.8417	49.7232	52.0806	52.2153	52.2279	52.1756				75.2583	78.3746	66.2033	65.6638	63.7728	74.5318	53.4322	52.0881	53.5381
33	77.0206	77.3322	76.0707	70.6097	83.9366	79.069	72.6944	77.7984	62.5606	62.0853	70.7243	69.4429	65.282	66.9141	65.0507	65.4083	63.5639	66.8393	63.6204	61.0676	69.8509	67.8667	77.6089	82.8007	53.4861	53.3983	53.4046	53.4399	52.2353	52.1147	52.0394	51.9632	53.4788	53.5636	53.5715	53.5386				75.3447	78.4254	66.3472	65.9272	64.2178	75.1662	54.333	53.4835	54.4089
34	77.095	77.4194	76.1796	70.6848	84.0191	79.1439	72.7903	77.7482	62.7475	62.1669	70.923	69.5512	65.5616	67.0855	65.3673	65.6944	64.0673	67.2299	64.0419	61.5322	70.451	68.4921	78.2061	83.5157	54.3716	54.3087	54.3133	54.3385	53.577	53.5004	53.4525	53.4041	54.3664	54.4272	54.4328	54.4093				75.4077	78.4864	66.4332	66.1106	64.5375	75.6941	54.9852	54.3697	55.0588
35	77.1674	77.495	76.2299	70.7386	84.1553	79.2127	72.7424	77.8353	62.8524	62.2828	71.0392	69.5586	65.7427	67.2807	65.5184	65.9005	64.4245	67.5972	64.3168	61.8114	70.9269	69.027	78.6688	84.1537	55.0227	54.9616	54.966	54.9905	54.4385	54.3821	54.3469	54.3113	55.0176	55.0765	55.082	55.0592				75.4235	78.4722	66.5458	66.3319	64.9135	76.208	55.6119	55.0209	55.6664
36	77.1637	77.5166	76.2488	70.7648	84.103	79.2363	72.7229	77.8267	62.9696	62.3705	71.0767	69.7665	65.9777	67.488	65.7379	66.1241	64.7472	67.9734	64.7792	62.1542	71.4654	69.393	79.2979	84.6758	55.6396	55.5945	55.5977	55.6158	55.086	55.0326	54.9993	54.9655	55.6359	55.6795	55.6836	55.6667				75.4356	78.4736	66.6802	66.5805	65.143	76.7449	56.0833	55.6382	56.1446
37	77.1892	77.5103	76.2572	70.7857	84.1064	79.2319	72.7625	77.7935	63.016	62.5093	71.2559	69.9396	66.1526	67.8952	65.9886	66.2857	65.0005	68.1547	65.0011	62.4158	71.9542	69.9304	79.8182	85.2767	56.1145	56.0637	56.0674	56.0877	55.6884	55.6473	55.6216	55.5956	56.1103	56.1594	56.1639	56.1449				75.439	78.4607	66.7967	66.7615	65.565	77.2263	56.609	56.1129	56.6654
38	77.1957	77.52	76.2541	70.786	84.1537	79.1249	72.7507	77.8136	63.1624	62.5484	71.4355	70.0406	66.3422	67.9217	66.2176	66.5646	65.4312	68.6332	65.3418	62.8539	72.3495	70.4053	80.3772	85.7732	56.6377	56.5909	56.5943	56.6131	56.1682	56.1229	56.0946	56.066	56.6338	56.6789	56.6832	56.6656				75.4568	78.4859	66.9036	66.9574	65.7921	77.7169	57.0891	56.6363	57.131
39	77.2029	77.5483	76.2814	70.7948	84.1321	79.1963	72.8072	77.808	63.2086	62.6433	71.589	70.1736	66.595	68.1219	66.361	66.7517	65.6502	68.8967	65.5764	63.0449	72.8226	70.7901	80.9038	86.3511	57.1104	57.0757	57.0782	57.0921	56.6862	56.6453	56.6198	56.5939	57.1075	57.141	57.1442	57.1312				75.4476	78.4357	67.0071	67.1328	66.0858	78.0725	57.4505	57.1093	57.4956
40	77.2177	77.5385	76.2598	70.7744	84.0528	79.1661	72.7986	77.7252	63.3385	62.7883	71.6545	70.247	66.6776	68.3862	66.5394	66.928	65.8704	69.2055	65.8859	63.3813	73.1576	71.194	81.3362	86.6022	57.4735	57.4361	57.4388	57.4538	57.1477	57.1162	57.0966	57.0767	57.4703	57.5064	57.5098	57.4958				75.4486	78.4335	67.1083	67.3016	66.1895	78.3529	57.8318	57.4724	57.8589
41	77.1932	77.5455	76.2697	70.7858	84.1273	79.0761	72.7892	77.7413	63.492	62.821	71.7656	70.3544	66.8856	68.5413	66.7665	67.013	66.0388	69.3038	65.9787	63.4368	73.3765	71.4301	81.6325	86.9723	57.8456	57.8231	57.8247	57.8337	57.5117	57.4795	57.4594	57.439	57.8437	57.8655	57.8675	57.8591				75.4534	78.4319	67.2234	67.4734	66.4088	78.6853	58.0706	57.8448	58.1128
42	77.1903	77.5564	76.2705	70.7966	84.0553	79.2183	72.7211	77.7329	63.4854	63.0062	71.8956	70.5063	67.1317	68.6685	66.868	67.2253	66.2144	69.5766	66.1536	63.6905	73.7086	71.6619	82.006	87.3646	58.0921	58.0571	58.0596	58.0737	57.8709	57.8495	57.8362	57.8227	58.0892	58.123	58.1261	58.113				75.4505	78.4095	67.311	67.5985	66.6424	78.9459	58.4297	58.0911	58.4604
43	77.1974	77.5561	76.2654	70.7832	84.0384	79.1013	72.7927	77.7055	63.6214	63.0219	72.0207	70.5801	67.1634	68.7807	67.0576	67.3923	66.4621	69.8346	66.4151	63.8579	73.9724	71.8826	82.2478	87.681	58.4453	58.4199	58.4218	58.432	58.1284	58.0978	58.0787	58.0594	58.4432	58.4678	58.4701	58.4606				75.4644	78.3679	67.3683	67.7127	66.7903	79.2361	58.6898	58.4446	58.7095
44	77.2155	77.5675	76.2794	70.7952	84.0986	79.0119	72.6649	77.696	63.6209	63.0494	72.1765	70.6264	67.3318	68.9121	67.1638	67.4429	66.6642	70.0447	66.5773	63.8748	74.1716	72.1614	82.6628	87.9486	58.6998	58.6834	58.6846	58.6912	58.4715	58.4495	58.4357	58.4218	58.6985	58.7143	58.7158	58.7096				75.4526	78.43	67.4823	67.8368	66.9601	79.5104	58.8641	58.6993	58.8958
45	77.213	77.557	76.2634	70.777	84.1136	79.1284	72.7244	77.7537	63.7389	63.2071	72.2122	70.7709	67.4216	69.1086	67.2888	67.528	66.7402	70.129	66.7695	64.2017	74.4354	72.516	82.8833	88.2068	58.8803	58.854	58.8559	58.8664	58.7184	58.7027	58.6929	58.683	58.8781	58.9034	58.9058	58.896				75.4621	78.3614	67.4654	67.8982	67.0466	79.6237	59.1332	58.8795	59.1555
46	77.217	77.5338	76.2961	70.8016	83.9907	79.0471	72.7202	77.6875	63.7326	63.1842	72.1794	70.7652	67.4775	69.1334	67.2725	67.7093	66.8889	70.2606	66.8373	64.1996	74.499	72.5495	82.9804	88.4661	59.1445	59.1261	59.1274	59.1348	58.9074	58.8845	58.8702	58.8558	59.143	59.1608	59.1625	59.1556				75.4552	78.3426	67.4865	67.9621	67.1638	79.8061	59.326	59.144	59.3524
47	77.1992	77.5659	76.2807	70.7749	84.0143	79.0067	72.671	77.6783	63.7621	63.195	72.1993	70.7896	67.4964	69.1214	67.4294	67.8012	66.994	70.3522	66.9869	64.3221	74.7163	72.7703	83.1341	88.6036	59.3394	59.3176	59.3192	59.3279	59.1646	59.1477	59.1371	59.1265	59.3376	59.3587	59.3607	59.3525				75.4746	78.34	67.5667	68.0587	67.313	79.9625	59.5437	59.3389	59.5448
48	77.2315	77.5564	76.2919	70.8184	84.0494	78.9729	72.7029	77.6347	63.821	63.2621	72.2637	70.9199	67.5882	69.3142	67.4798	67.8524	67.1859	70.5509	67.1017	64.4134	74.8541	72.8842	83.3247	88.7869	59.5442	59.5433	59.5434	59.5437	59.3605	59.3428	59.3317	59.3206	59.5442	59.545	59.5451	59.5448				75.4626	78.2853	67.6224	68.1514	67.3792	80.0593	59.5587	59.5441	59.5757
49	77.2328	77.5709	76.2587	70.788	83.8572	79.0541	72.6711	77.5588	63.9274	63.2566	72.3523	70.9535	67.7079	69.4386	67.5479	67.9112	67.2778	70.601	67.0648	64.573	74.9217	72.9402	83.4425	88.9327	59.5673	59.5532	59.5542	59.5599	59.5466	59.5446	59.5433	59.542	59.5662	59.5798	59.5811	59.5758				75.4549	78.2921	67.6549	68.2285	67.3956	80.2155	59.7058	59.5669	59.7248
50	77.2175	77.5327	76.265	70.8043	84.0132	78.9008	72.6815	77.5728	63.951	63.2558	72.359	71.0538	67.7913	69.5156	67.5799	68.0273	67.1723	70.7026	67.1852	64.5224	75.0856	73.0695	83.5902	89.1167	59.7155	59.6997	59.7008	59.7072	59.5825	59.5697	59.5617	59.5536	59.7142	59.7294	59.7308	59.7249
Fmax	77.1664	77.4911	76.2149	70.7354	80.9956	75.7355	70.0625	74.2151	61.5693	61.1584	69.4449	67.8386	64.5805	65.9135	64.3314	64.4818	62.616	65.8592	61.4824	59.758	68.3074	66.3209	75.8777	80.8212	58.2846	58.2659	58.2691	58.2794	58.2156	58.1963	58.1829	58.1734	58.2916	58.3092	58.309	58.3033
B	1.5589	1.56704	1.55959	1.56543	1.23602	1.22014	1.24348	1.20729	1.30094	1.29448	1.28611	1.28072	1.33223	1.3275	1.33523	1.32818	1.37568	1.38868	1.34735	1.38042	1.466	1.45781	1.46529	1.43318	2.45364	2.44092	2.44157	2.44628	2.42202	2.41079	2.40401	2.39675	2.45136	2.46343	2.46479	2.46005
C	23.3344	23.3274	23.3497	23.323	24.1345	24.146	24.133	24.1576	24.4391	24.4459	24.4687	24.4625	24.6267	24.6331	24.6338	24.6101	24.9471	24.9364	24.9228	24.891	25.0943	25.1373	25.1311	25.2394	23.5807	23.6601	23.6598	23.6372	24.86	24.9334	24.9649	24.9953	23.6085	23.5079	23.4932	23.5379
D	1.27061	1.27765	1.26739	1.27741	0.809584	0.797477	0.816955	0.784216	0.842408	0.83754	0.828702	0.823523	0.855552	0.85315	0.85614	0.852098	0.865802	0.876136	0.846684	0.875406	0.927961	0.919643	0.926378	0.89238	3.5941	3.63764	3.62755	3.59856	3.16992	3.20008	3.23541	3.27347	3.57144	3.5608	3.56638	3.56331
Fb	0.0432882	0.0564662	0.059418	0.0554779	-0.0209604	-0.0205755	-0.0155937	-0.0240225	-0.0328025	-0.0342903	-0.0310463	-0.0357891	-0.031081	-0.03574	-0.0252317	-0.0328956	-0.037833	-0.0365116	-0.0369788	-0.0343668	-0.0352787	-0.0372445	-0.0348287	-0.0423211	0.0617775	0.0606614	0.0587359	0.0562647	0.0251119	0.0262798	0.0282028	0.0254817	0.0524099	0.0530678	0.0550567	0.0538234
x flex	23.7077	23.7114	23.7192	23.7063	23.8734	23.8699	23.8816	23.8641	24.216	24.2164	24.227	24.2139	24.4188	24.4222	24.4264	24.3975	24.7488	24.7528	24.6986	24.7073	24.9847	25.0152	25.019	25.0762	26.7196	26.8122	26.806	26.7697	27.6543	27.7375	27.7876	27.8374	26.7291	26.6364	26.6273	26.6639
y flex	36.9469	37.0789	36.5245	33.8515	42.2129	39.5921	36.4499	38.9269	31.8136	31.6367	36.0084	35.2149	33.2687	33.9707	33.1416	33.2431	32.1718	33.761	31.732	30.6372	34.6206	33.6707	38.4748	41.2815	24.1822	24.1445	24.1506	24.1716	24.4351	24.4031	24.3705	24.3334	24.1911	24.2063	24.2044	24.2028
slope (m)	13.247	13.2529	13.0693	12.1093	15.2868	14.4039	13.1855	14.1806	11.1928	11.1515	12.6986	12.4302	11.5249	11.7934	11.4572	11.5266	10.8648	11.3655	10.8107	10.3715	11.3782	11.0772	12.6384	13.5969	7.69066	7.73917	7.73503	7.71424	7.66142	7.70408	7.73497	7.76878	7.69301	7.65491	7.65211	7.66529
Cy0	20.9219	20.9179	20.9291	20.9154	21.1106	21.1197	21.116	21.1173	21.3708	21.3764	21.389	21.378	21.5294	21.5387	21.5316	21.5106	21.7842	21.7791	21.7599	21.75	21.9389	21.9722	21.972	22.037	23.5833	23.7002	23.6913	23.6436	24.4682	24.5734	24.6405	24.7085	23.5913	23.4812	23.4714	23.5134
Cy0 corrected	20.9256	20.8611	20.8745	20.7483	21.5144	21.5326	21.2909	21.535	20.7648	20.8022	21.006	20.9834	20.6576	20.7411	20.6115	20.6576	20.3267	20.3244	20.4658	20.2754	20.0191	20.0313	20.1871	20.4001	20.3285	20.5969	20.5726	20.4556	20.8239	21.0631	21.2372	21.4252	20.3349	20.121	20.1063	20.1806
m calibration curve	14.045
y flex calibration curve	39.3442
SOD probability	0.584713	0.617495	0.810447	0.685849	2.58939e-09	7.42465e-09	2.40766e-07	4.76942e-09	2.94239e-07	2.20239e-07	2.49678e-06	1.60875e-06	7.67871e-07	1.44072e-06	5.95193e-07	7.27418e-07	2.07499e-08	4.59811e-08	2.97361e-08	8.17558e-09	1.42839e-09	1.23924e-09	9.39168e-10	2.34878e-10	6.11151e-13	4.59536e-12	1.52112e-11	8.46088e-12	9.36906e-16	2.62199e-15	1.08704e-15	3.66887e-15	1.26516e-15	1.31559e-14	1.41497e-14	5.19273e-15
Log_input DNA Cy0 (obs-exp)	4.57287	4.57403	4.57081	4.57474	4.51876	4.51616	4.51723	4.51684	4.44419	4.44259	4.43897	4.44213	4.39871	4.39604	4.39808	4.4041	4.32566	4.32714	4.33263	4.33546	4.28132	4.27178	4.27183	4.2532	3.80991	3.77638	3.77894	3.7926	3.55622	3.52606	3.50681	3.48732	3.80761	3.83919	3.84199	3.82993
Log_input DNA Cy0 corrected (obs-exp)	4.5718	4.59031	4.58646	4.62265	4.40302	4.39779	4.46708	4.39712	4.61792	4.6072	4.54876	4.55525	4.64863	4.62471	4.66185	4.64865	4.7435	4.74416	4.70363	4.7582	4.83169	4.8282	4.78354	4.72246	4.74298	4.66604	4.67302	4.70656	4.60097	4.53239	4.48248	4.42858	4.74115	4.80246	4.8067	4.78538
intecept calibration curve	36.873
slope calibration curve	-3.4882
Rel_err Cy0	-0.0271273	-0.0259724	-0.0291924	-0.0252626	-0.0812358	-0.0838397	-0.0827697	-0.083157	-0.155806	-0.15741	-0.161027	-0.157875	-0.201291	-0.203958	-0.201916	-0.195897	-0.274344	-0.272864	-0.267374	-0.264535	-0.318678	-0.328219	-0.328171	-0.346796	-0.790091	-0.823617	-0.821063	-0.807398	-1.04378	-1.07394	-1.09319	-1.11268	-0.792395	-0.760814	-0.75801	-0.770066
Rel_err Cy0 corr Emax	-0.028196	-0.00968706	-0.0135389	0.0226524	-0.19698	-0.202206	-0.132925	-0.202881	0.0179238	0.00719755	-0.051245	-0.0447544	0.0486309	0.0247134	0.0618537	0.0486515	0.143502	0.144165	0.103633	0.158201	0.231689	0.228198	0.183539	0.122462	0.142981	0.0660427	0.0730221	0.106555	0.000973477	-0.0676107	-0.117517	-0.171421	0.141146	0.202464	0.206699	0.185385
	ND1F2 500 nM	ND1F5 125 nM ND1F2 375 nM	ND1F5 250 nM ND1F2 250 nM	ND1F5 300 nM ND1F2 200 nM	ND1F5 350 nM ND1F2 150 nM	ND1F5 375 nM ND1F2 125 nM	ND1F5 400 nM ND1F2 100 nM	ND1F5 450 nM ND1F2 50 nM	ND1F5 500 nM ND1R2
mean RE cy0	-0.0268887	-0.0827506	-0.158029	-0.200765	-0.269779	-0.330466	-0.810542	-1.0809	-0.770321
mean RE cy0 corr	-0.00719239	-0.183748	-0.0177195	0.0459624	0.137375	0.191472	0.0971503	-0.0888938	0.183924
CV Cy0 corrected	0.00354759				0.00558126				0.00591876				0.00262632				0.00404894				0.00877409				0.00596615				0.0122878				0.00517889

## Sheet: CV
HE block	0.00368582	0.00444136	0.0048124	0.00371982	0.00729732	0.00228047	0.0103521	0.0249223
LE block	0.00858544	0.00508993	0.00519049	0.0131129	0.00921431	0.00428666	0.0163746	0.00361906
HE/LE competition	0.00354759	0.00558126	0.00591876	0.00262632	0.00404894	0.00877409	0.00596615	0.0122878
