# Supplementary material for: Accurate and Precise DNA Quantification in the Presence of Different Amplification Efficiencies Using an Improved Cy0 Method
Source: PLoS One. 2013 Jul 8;8(7):e68481. doi: 10.1371/journal.pone.0068481 (PMC3704541; doi:10.1371/journal.pone.0068481)
Supplement: Data File S4 — Fluorescence data, fitting elaborations and Cy0 calculations obtained using the freely available data set named “Competimer” reported in Ruijter et al. [32] . (XLS) [file pone.0068481.s004.xls]

## Sheet: Competimer Data Set - Raw Fluor
cycle	A_A_1	A_A_2	A_A_3	A_B_1	A_B_2	A_B_3	A_C_1	A_C_2	A_C_3	A_D_1	A_D_2	A_D_3	A_E_1	A_E_2	A_E_3	A_F_1	A_F_2	A_F_3	A_G_1	A_G_2	A_G_3	B_A_1	B_A_2	B_A_3	B_B_1	B_B_2	B_B_3	B_C_1	B_C_2	B_C_3	B_D_1	B_D_2	B_D_3	B_E_1	B_E_2	B_E_3	B_F_1	B_F_2	B_F_3	B_G_1	B_G_2	B_G_3	C_A_1	C_A_2	C_A_3	C_B_1	C_B_2	C_B_3	C_C_1
1	2.0156	1.961	2.04495	0.960062	0.912929	0.938782	0.597136	0.551033	0.504287	0.459886	0.423096	0.445496	0.434553	0.471388	0.42234	0.400216	0.426629	0.393962	0.510055	0.394348	0.393811	2.02524	1.61804	2.23102	0.954356	0.932446	0.963377	0.527079	0.570159	0.532275	0.4307	0.43444	0.416547	0.41142	0.387512	0.38756	0.461728	0.432507	0.418562	0.460292	0.417165	0.401223	2.06664	2.27039	2.28873	0.974049	1.00631	0.99325	0.586641
2	2.30156	2.2288	2.29971	1.02074	0.994251	1.01863	0.633448	0.577987	0.530924	0.495002	0.463803	0.474601	0.472382	0.497816	0.437242	0.421163	0.45983	0.433717	0.578592	0.429386	0.426514	2.2777	1.82311	2.4477	1.03314	0.997438	1.03324	0.574736	0.617248	0.578831	0.459578	0.468913	0.448093	0.440158	0.410645	0.408001	0.470739	0.471199	0.45481	0.500318	0.458053	0.427112	2.33073	2.50395	2.51331	1.04594	1.07077	1.05951	0.622128
3	2.31971	2.26645	2.34945	1.06239	1.0288	1.06174	0.639692	0.58416	0.539946	0.495219	0.472694	0.480595	0.469709	0.498043	0.443288	0.427272	0.460048	0.436972	0.578863	0.426408	0.436447	2.31268	1.82378	2.49057	1.05232	1.01621	1.05774	0.574936	0.611654	0.584878	0.454035	0.460547	0.44545	0.431791	0.413703	0.405279	0.470952	0.453635	0.452013	0.494413	0.455123	0.427292	2.37222	2.52463	2.54628	1.06501	1.10166	1.09879	0.631174
4	2.36447	2.30324	2.40811	1.09095	1.06301	1.07701	0.648712	0.587141	0.548765	0.486526	0.46695	0.474861	0.463962	0.495188	0.434557	0.418448	0.451108	0.421793	0.566501	0.432792	0.429978	2.374	1.84354	2.53892	1.08053	1.05307	1.09093	0.583822	0.626309	0.593579	0.471294	0.466284	0.454034	0.44325	0.416604	0.408216	0.471004	0.465542	0.452057	0.500596	0.461423	0.436946	2.41617	2.587	2.60384	1.09299	1.13823	1.12271	0.63705
5	2.41861	2.38921	2.48204	1.14444	1.10605	1.13453	0.666422	0.613559	0.569063	0.495077	0.478377	0.477609	0.463846	0.495066	0.437377	0.418346	0.453996	0.421689	0.563273	0.416855	0.42341	2.43781	1.87578	2.63135	1.14283	1.10483	1.15078	0.60726	0.634818	0.613621	0.465381	0.469004	0.456761	0.431714	0.405037	0.40235	0.45921	0.453583	0.451957	0.485147	0.448806	0.424039	2.46264	2.62872	2.66038	1.13297	1.17734	1.15811	0.654403
6	2.54682	2.51713	2.60349	1.2528	1.22455	1.24782	0.71463	0.652273	0.604447	0.506919	0.484393	0.486522	0.466983	0.501137	0.443459	0.415614	0.451257	0.421928	0.56047	0.42026	0.417139	2.51712	1.90278	2.74197	1.19334	1.1789	1.22956	0.631092	0.670145	0.63989	0.474175	0.480662	0.459843	0.426224	0.405244	0.414134	0.456543	0.447928	0.446197	0.494636	0.44592	0.424277	2.54817	2.7283	2.72861	1.19879	1.24787	1.22729	0.683993
7	2.68933	2.67567	2.758	1.41541	1.39614	1.41629	0.795945	0.717722	0.678015	0.536249	0.510729	0.512841	0.467278	0.510206	0.449621	0.421823	0.448565	0.425282	0.563992	0.417396	0.423952	2.65481	1.95648	2.88524	1.34149	1.31458	1.3749	0.69055	0.723091	0.706802	0.491615	0.495228	0.477249	0.435076	0.417014	0.414405	0.465624	0.460097	0.446521	0.488867	0.443132	0.411737	2.67474	2.84145	2.87082	1.30523	1.36119	1.35049	0.731263
8	2.8479	2.83972	2.95363	1.65691	1.61061	1.65435	0.927882	0.836117	0.801099	0.571116	0.53683	0.553388	0.481831	0.513238	0.449735	0.427856	0.460685	0.428435	0.554811	0.417508	0.420809	2.81176	2.05558	3.04649	1.54877	1.51113	1.60109	0.785152	0.822448	0.802272	0.526022	0.512399	0.502983	0.437983	0.417097	0.420292	0.456957	0.45724	0.458688	0.492063	0.449519	0.424705	2.82378	2.99599	3.03088	1.44845	1.51959	1.52387	0.819275
9	2.9931	3.0109	3.12032	1.90502	1.8876	1.92313	1.129	1.00785	0.982863	0.649601	0.612151	0.61997	0.490607	0.522126	0.46162	0.416161	0.448852	0.431669	0.545705	0.417694	0.414478	2.96232	2.10857	3.22751	1.75934	1.75095	1.82737	0.927274	0.974493	0.9499	0.551694	0.561008	0.551556	0.443759	0.425849	0.420438	0.460063	0.460394	0.45285	0.476914	0.437173	0.415249	2.96983	3.14109	3.19448	1.64801	1.71473	1.72733	0.927895
10	3.16589	3.19555	3.2675	2.16602	2.13979	2.19197	1.42627	1.28919	1.24667	0.780338	0.742419	0.753025	0.522456	0.560057	0.499846	0.419226	0.458019	0.434877	0.542795	0.408311	0.411378	3.12654	2.18471	3.4247	2.02986	2.00311	2.11107	1.14944	1.19954	1.18432	0.643311	0.646658	0.628582	0.466597	0.445997	0.437876	0.466048	0.460555	0.446975	0.480159	0.446751	0.418606	3.1328	3.33222	3.36444	1.88502	1.9801	1.96962	1.1247
11	3.30407	3.38335	3.46994	2.41423	2.39824	2.44545	1.77466	1.59414	1.55436	1.01572	0.970988	0.969802	0.600506	0.621153	0.564381	0.442965	0.473114	0.462455	0.542933	0.408439	0.414744	3.30763	2.26733	3.5926	2.29092	2.23372	2.3584	1.44289	1.49185	1.46781	0.786404	0.806444	0.77395	0.503538	0.489039	0.481292	0.468988	0.466559	0.453097	0.471072	0.431184	0.412282	3.33279	3.4902	3.55661	2.13447	2.23625	2.21178	1.37733
12	3.47615	3.55388	3.63927	2.63672	2.60653	2.68642	2.08375	1.89001	1.85879	1.34693	1.28614	1.28465	0.724649	0.731528	0.669815	0.475454	0.500119	0.477707	0.539834	0.411645	0.414792	3.46434	2.35296	3.74388	2.50764	2.47648	2.58725	1.75699	1.81029	1.79446	1.0241	1.03735	1.00755	0.571643	0.560605	0.547696	0.483487	0.490256	0.480221	0.480289	0.440635	0.412334	3.468	3.65761	3.70985	2.35248	2.45544	2.44458	1.67978
13	3.65036	3.71974	3.80725	2.84547	2.82323	2.91115	2.344	2.1408	2.09504	1.72122	1.65563	1.65371	0.946805	0.928689	0.865738	0.525417	0.559925	0.526331	0.548978	0.411534	0.414678	3.63338	2.4211	3.91636	2.72345	2.6721	2.80314	2.03185	2.07831	2.0624	1.3188	1.34198	1.30617	0.687878	0.683413	0.660023	0.503524	0.522595	0.498066	0.470891	0.437385	0.405795	3.62896	3.81041	3.90654	2.54149	2.64325	2.66456	1.97568
14	3.80773	3.86265	3.96939	3.02219	3.01177	3.10837	2.59477	2.36422	2.313	2.06535	2.01242	2.01289	1.2481	1.23145	1.15337	0.608378	0.653262	0.630439	0.533723	0.405505	0.405227	3.75843	2.49178	4.10587	2.91376	2.87057	3.00689	2.28517	2.3487	2.29774	1.65235	1.69094	1.64894	0.890519	0.881417	0.851059	0.559056	0.58209	0.54653	0.46811	0.431469	0.399691	3.78354	3.97708	4.04317	2.73317	2.86747	2.86934	2.23543
15	3.91905	4.03117	4.11722	3.2076	3.19944	3.31089	2.78774	2.57529	2.51871	2.36256	2.3255	2.30218	1.62749	1.59793	1.51991	0.78	0.83047	0.792366	0.533774	0.39295	0.395634	3.91641	2.55504	4.2424	3.10016	3.02506	3.19175	2.49643	2.53644	2.51812	1.94253	2.01109	1.96567	1.17019	1.16528	1.12285	0.640506	0.682791	0.62487	0.458907	0.425368	0.393426	3.92672	4.11284	4.18819	2.90853	3.03898	3.04343	2.45644
16	4.08642	4.17695	4.27873	3.39092	3.40062	3.50512	3.02409	2.77877	2.69058	2.62924	2.61403	2.56691	2.02901	1.98073	1.92638	1.06653	1.1481	1.08798	0.53641	0.411893	0.418283	4.07524	2.63317	4.40848	3.29396	3.23313	3.39269	2.69413	2.75784	2.71086	2.20574	2.27857	2.22109	1.54067	1.5114	1.46611	0.78856	0.874715	0.780976	0.470791	0.425212	0.399709	4.08432	4.27227	4.3625	3.08196	3.22076	3.21558	2.67886
17	4.23958	4.34257	4.45315	3.59587	3.59807	3.70502	3.22352	2.98135	2.88797	2.88046	2.84076	2.80764	2.34225	2.29235	2.24327	1.45169	1.56555	1.48205	0.54868	0.41524	0.415207	4.22684	2.69996	4.58427	3.49649	3.43121	3.60521	2.92366	2.97542	2.91436	2.44187	2.52785	2.46114	1.89523	1.86162	1.80748	1.03365	1.16195	1.01286	0.479788	0.437957	0.403099	4.27203	4.42496	4.52082	3.27648	3.4202	3.41109	2.88557
18	4.39087	4.50966	4.61585	3.78336	3.77216	3.90644	3.41862	3.16785	3.06657	3.08097	3.07223	3.00963	2.61123	2.54789	2.50355	1.86599	1.98829	1.90912	0.557537	0.415225	0.411937	4.3971	2.74562	4.75159	3.70074	3.60626	3.80111	3.11628	3.16536	3.12252	2.64541	2.73896	2.67173	2.18623	2.13074	2.10181	1.35151	1.55246	1.34081	0.479228	0.444235	0.415976	4.41385	4.60209	4.69639	3.42888	3.60595	3.59918	3.08523
19	4.55468	4.68547	4.79355	3.9825	3.97633	4.12196	3.63373	3.38305	3.28533	3.32425	3.29693	3.23396	2.83886	2.77072	2.74557	2.25002	2.39536	2.28051	0.591155	0.434149	0.434614	4.54556	2.82702	4.89816	3.87864	3.79876	4.00188	3.33768	3.38366	3.33261	2.85679	2.94925	2.88159	2.44802	2.37063	2.33758	1.6982	1.9601	1.70745	0.487691	0.440918	0.409394	4.59502	4.75806	4.86418	3.60848	3.79065	3.80721	3.28391
20	4.66854	4.80949	4.93061	4.15443	4.15394	4.3054	3.82618	3.54909	3.44955	3.53673	3.51706	3.43632	3.04436	2.99174	2.95054	2.52822	2.68323	2.57033	0.625057	0.465934	0.454136	4.68216	2.86643	5.04982	4.06749	3.95568	4.16183	3.51575	3.5534	3.5208	3.04046	3.15207	3.07828	2.66211	2.5626	2.53378	1.99293	2.30029	2.0265	0.493329	0.450324	0.428701	4.71359	4.90935	5.03064	3.76754	3.96764	3.98071	3.48394
21	4.82069	4.9741	5.06484	4.31722	4.32571	4.48005	4.00991	3.7511	3.6288	3.71753	3.71148	3.66224	3.26761	3.18976	3.14417	2.75936	2.9445	2.82687	0.708865	0.500882	0.490015	4.8191	2.95914	5.22134	4.25043	4.13768	4.36761	3.73286	3.75281	3.7122	3.23023	3.34378	3.26387	2.87078	2.76353	2.74197	2.2089	2.60237	2.29454	0.535925	0.462842	0.441601	4.8766	5.04781	5.18467	3.9426	4.12965	4.15453	3.66654
22	4.95479	5.12783	5.22758	4.5143	4.52166	4.67841	4.21408	3.91681	3.81327	3.95886	3.94003	3.84985	3.47002	3.40762	3.38128	3.01378	3.18729	3.07073	0.861037	0.592879	0.58111	4.95866	2.99493	5.36288	4.4263	4.30347	4.54232	3.91359	3.94571	3.91167	3.42803	3.55493	3.46605	3.0761	2.96111	2.93519	2.42458	2.85365	2.52004	0.58456	0.500319	0.463984	5.03878	5.19864	5.32503	4.10445	4.33689	4.33366	3.85441
23	5.05927	5.25958	5.35266	4.65854	4.65968	4.85982	4.38633	4.11936	3.98419	4.14308	4.14366	4.0589	3.66474	3.59739	3.57541	3.21576	3.40706	3.27265	1.11934	0.75489	0.727666	5.1099	3.05484	5.51245	4.59722	4.47373	4.70632	4.08062	4.12218	4.09201	3.60677	3.74427	3.65214	3.27381	3.15678	3.12358	2.62356	3.08812	2.72518	0.679451	0.556613	0.521811	5.1685	5.34768	5.45731	4.2707	4.48419	4.4931	4.03463
24	5.19254	5.35883	5.46561	4.78797	4.8019	5.00847	4.52354	4.28447	4.12103	4.31965	4.30194	4.21691	3.8724	3.77391	3.75033	3.43117	3.61626	3.51271	1.51086	1.034	0.984524	5.20424	3.09691	5.60463	4.74406	4.60806	4.84099	4.25185	4.28217	4.25312	3.78969	3.92625	3.81948	3.45291	3.31078	3.29905	2.80675	3.29746	2.91991	0.856891	0.668929	0.608182	5.27225	5.45483	5.60321	4.40063	4.6418	4.63254	4.21899
25	5.30745	5.49065	5.59729	4.95779	4.97744	5.1838	4.72303	4.45442	4.295	4.52147	4.52599	4.43476	4.05564	3.96087	3.971	3.64807	3.86923	3.74502	2.03994	1.46597	1.39475	5.33847	3.15687	5.74781	4.90873	4.77217	5.02627	4.41598	4.46757	4.43647	3.96562	4.11852	4.01136	3.65357	3.50942	3.48754	3.00583	3.52314	3.12792	1.14529	0.859736	0.791164	5.42577	5.58746	5.73558	4.56384	4.81369	4.79805	4.38749
26	5.40911	5.61949	5.72596	5.09628	5.0942	5.31356	4.86276	4.61905	4.44316	4.69755	4.69538	4.60097	4.25412	4.16028	4.14253	3.84824	4.07504	3.95393	2.53349	1.96375	1.88548	5.49033	3.18859	5.86204	5.05508	4.89989	5.16349	4.60465	4.63005	4.58261	4.14526	4.30293	4.20403	3.82076	3.6774	3.67133	3.18584	3.71139	3.32215	1.54683	1.14094	1.07977	5.52893	5.71385	5.85204	4.70585	4.9249	4.94306	4.53598
27	5.51969	5.73027	5.83712	5.20791	5.23778	5.45136	5.00129	4.75568	4.58415	4.87246	4.85201	4.76313	4.42228	4.28542	4.32152	4.04091	4.27933	4.14293	2.93129	2.41757	2.33111	5.56562	3.2481	6.00429	5.18743	5.03551	5.30865	4.74736	4.75609	4.72466	4.30048	4.45165	4.34101	4.00664	3.84678	3.83616	3.34056	3.90987	3.49638	1.99801	1.54494	1.47801	5.65109	5.80934	5.97384	4.86208	5.08075	5.07785	4.68027
28	5.61754	5.81203	5.94622	5.33337	5.36055	5.58104	5.14679	4.91699	4.71427	5.04249	5.04151	4.92906	4.59997	4.46676	4.5042	4.2581	4.47239	4.34196	3.27377	2.77979	2.67305	5.66933	3.27509	6.07987	5.2925	5.14747	5.4488	4.89093	4.91826	4.85308	4.4335	4.62705	4.49597	4.17892	4.02263	4.02201	3.52527	4.10912	3.70155	2.40037	2.00284	1.91205	5.76078	5.91917	6.08082	4.95673	5.21929	5.21963	4.84609
29	5.68289	5.89563	6.03087	5.43828	5.4507	5.70015	5.24583	5.02953	4.82848	5.18495	5.1833	5.05612	4.74751	4.63831	4.63881	4.41189	4.66736	4.51859	3.544	3.04293	2.94937	5.76132	3.27466	6.15383	5.42142	5.27049	5.53914	5.01552	5.04693	5.00061	4.5971	4.77263	4.62409	4.33302	4.13993	4.17211	3.71206	4.31925	3.86053	2.70994	2.37234	2.291	5.86553	6.02747	6.17338	5.09077	5.33503	5.3121	4.96058
30	5.80967	6.00535	6.13443	5.56175	5.57151	5.82778	5.41357	5.18904	4.97158	5.33856	5.33034	5.21156	4.95256	4.80634	4.8434	4.61272	4.85279	4.74368	3.81387	3.31861	3.19614	5.87658	3.33689	6.29502	5.56552	5.38672	5.67425	5.16624	5.18672	5.14468	4.7631	4.94062	4.80321	4.51525	4.30858	4.34784	3.875	4.51704	4.06442	2.99762	2.67874	2.58922	5.96295	6.11864	6.28129	5.20547	5.46858	5.46698	5.14235
31	5.85509	6.08952	6.20646	5.64177	5.68092	5.93798	5.51307	5.27239	5.0835	5.47566	5.44642	5.34488	5.09776	4.95229	4.96402	4.7644	5.01242	4.90287	4.05124	3.53261	3.43845	5.95903	3.37148	6.36285	5.65082	5.51645	5.79217	5.32112	5.32766	5.26372	4.88419	5.07246	4.93484	4.66145	4.47283	4.45527	4.06005	4.65969	4.2337	3.21042	2.93393	2.8446	6.02091	6.22083	6.37092	5.32769	5.58787	5.57486	5.25441
32	5.90992	6.1363	6.24888	5.70207	5.73375	6.00839	5.60622	5.37607	5.16537	5.58337	5.55939	5.4431	5.19015	5.06541	5.08084	4.93277	5.18013	5.05479	4.28029	3.75027	3.65497	5.99967	3.38632	6.42749	5.75778	5.5778	5.86466	5.39812	5.3889	5.34459	4.97857	5.18082	5.04578	4.79821	4.58986	4.60504	4.21695	4.81601	4.38617	3.42972	3.13566	3.0515	6.13584	6.29634	6.46065	5.41157	5.6701	5.66453	5.35126
33	5.96276	6.22102	6.32144	5.82085	5.84054	6.10382	5.72429	5.48068	5.27775	5.69177	5.68177	5.57976	5.34161	5.18262	5.21367	5.06407	5.31911	5.2205	4.48987	3.99636	3.87141	6.0656	3.39141	6.47007	5.83098	5.68028	5.93772	5.49688	5.51563	5.42921	5.09148	5.27871	5.15494	4.92765	4.69693	4.71295	4.33198	4.971	4.53772	3.61212	3.35666	3.27503	6.18423	6.35633	6.52207	5.49991	5.7655	5.764	5.46088
34	6.03209	6.28841	6.3969	5.87531	5.90008	6.18369	5.81788	5.5908	5.36898	5.79691	5.79513	5.6755	5.45777	5.3051	5.33705	5.20057	5.47251	5.34267	4.69527	4.18697	4.07009	6.14448	3.40795	6.55437	5.94473	5.77608	6.05293	5.58626	5.59788	5.55996	5.20379	5.40195	5.25787	5.07371	4.81764	4.84324	4.49582	5.12817	4.70038	3.83617	3.56976	3.46461	6.26245	6.44876	6.58637	5.60321	5.85429	5.83604	5.57893
35	6.06248	6.30786	6.41255	5.89695	5.95245	6.24419	5.86533	5.62274	5.43	5.87489	5.85238	5.75583	5.55563	5.39174	5.43313	5.3125	5.5739	5.45179	4.86559	4.40549	4.26474	6.21553	3.40746	6.58917	6.01341	5.80926	6.09146	5.66884	5.68516	5.62592	5.275	5.4785	5.34858	5.15592	4.89735	4.94962	4.62091	5.24302	4.79592	4.03199	3.76025	3.67615	6.30918	6.47434	6.64008	5.65875	5.90549	5.90122	5.63703
36	6.15539	6.39476	6.52004	5.99869	6.03953	6.32655	5.94932	5.75017	5.5089	6.07574	5.97383	5.86844	5.67129	5.50501	5.53841	5.45451	5.7208	5.58876	5.08925	4.60524	4.48583	6.25968	3.41039	6.67287	6.06344	5.90763	6.17881	5.77558	5.78744	5.73284	5.381	5.5926	5.45103	5.29005	5.01764	5.07951	4.76093	5.37896	4.96121	4.23111	3.95417	3.8815	6.41736	6.54309	6.72946	5.75528	6.0121	6.01174	5.7309
37	6.17254	6.43824	6.5362	6.06868	6.08611	6.39982	6.02438	5.8242	5.59094	6.16002	6.0664	5.96666	5.76674	5.60086	5.65555	5.558	5.8287	5.70141	5.26005	4.78281	4.67438	6.30739	3.4168	6.73732	6.11047	5.98144	6.23905	5.82286	5.87815	5.78179	5.47855	5.6839	5.51925	5.37269	5.11505	5.15438	4.88055	5.50614	5.06925	4.40881	4.1545	4.06119	6.45111	6.60215	6.78366	5.82378	6.07908	6.07739	5.82199
38	6.22017	6.48112	6.58447	6.09347	6.11972	6.44804	6.08385	5.89176	5.6578	6.22339	6.12655	6.02667	5.85294	5.69621	5.75158	5.69364	5.93907	5.80746	5.40858	4.96316	4.87229	6.32035	3.40635	6.76561	6.17281	6.0393	6.28664	5.9054	5.9448	5.84191	5.54686	5.74895	5.62424	5.48637	5.19755	5.252	5.00267	5.5912	5.18289	4.56461	4.30731	4.23729	6.51138	6.64418	6.82773	5.86991	6.14249	6.13652	5.88008
39	6.27692	6.51631	6.59593	6.16834	6.18364	6.48333	6.11246	5.95562	5.71205	6.29487	6.19767	6.08026	5.90947	5.75877	5.81169	5.73647	6.05172	5.88811	5.55289	5.11037	5.00688	6.39027	3.41705	6.7996	6.23736	6.08389	6.34566	5.96338	5.99022	5.91877	5.61432	5.82761	5.70273	5.55633	5.27351	5.31399	5.09158	5.69924	5.29244	4.77139	4.49005	4.40214	6.52993	6.6952	6.87423	5.96196	6.21422	6.19186	5.95217
40	6.26424	6.54761	6.64931	6.19486	6.21586	6.53031	6.17065	6.00111	5.74821	6.35132	6.2451	6.13334	6.00031	5.81495	5.87418	5.82931	6.10671	5.96226	5.68434	5.28268	5.15408	6.41528	3.41419	6.82331	6.26988	6.13112	6.37684	6.02378	6.06452	5.95737	5.64967	5.88004	5.73493	5.64588	5.35759	5.39871	5.17421	5.78607	5.3775	4.91013	4.66307	4.5731	6.58524	6.75555	6.91378	6.01293	6.26714	6.28579	6.00902
41	6.30609	6.59142	6.69182	6.26196	6.27829	6.6036	6.24289	6.0427	5.79531	6.42105	6.30582	6.18533	6.05824	5.87906	5.95636	5.93017	6.21483	6.09054	5.84321	5.42605	5.32403	6.45661	3.40576	6.87491	6.33294	6.2206	6.46139	6.09808	6.13479	6.02978	5.75907	5.96869	5.82064	5.73748	5.44398	5.4828	5.27686	5.89281	5.468	5.08568	4.82363	4.75398	6.63965	6.7983	6.97766	6.07863	6.33123	6.32153	6.09734
42	6.31527	6.5871	6.70078	6.26101	6.30242	6.60291	6.27828	6.07159	5.83557	6.46122	6.34867	6.21936	6.10387	5.92772	5.99657	5.97374	6.26509	6.10478	5.93855	5.56775	5.42021	6.48626	3.4003	6.89357	6.35098	6.23826	6.45762	6.10024	6.13692	6.04346	5.78409	5.99942	5.83977	5.76803	5.48605	5.52809	5.33425	5.94222	5.54821	5.15782	4.93801	4.85836	6.66575	6.83039	6.96086	6.11837	6.33344	6.35982	6.11127
43	6.39327	6.64942	6.75817	6.32025	6.36033	6.68111	6.3281	6.15047	5.9048	6.51522	6.41113	6.2875	6.17792	6.02549	6.06565	6.07621	6.37188	6.20414	6.05538	5.69666	5.60134	6.54298	3.39278	6.93734	6.40949	6.30474	6.51971	6.15833	6.21769	6.13499	5.83454	6.08111	5.9385	5.8497	5.55373	5.60205	5.45007	6.03866	5.67043	5.3378	5.10615	5.02114	6.70842	6.86511	7.0363	6.16383	6.40846	6.42729	6.20419
44	6.40881	6.6579	6.79261	6.35057	6.39317	6.71341	6.37486	6.18469	5.93275	6.57226	6.4998	6.35569	6.23748	6.07359	6.12293	6.14002	6.42156	6.28203	6.18756	5.82514	5.71668	6.55498	3.377	6.98765	6.4458	6.35569	6.57579	6.23726	6.28088	6.15968	5.88201	6.14276	5.96562	5.91126	5.61545	5.6671	5.5216	6.09943	5.71386	5.45881	5.22958	5.14127	6.73729	6.89325	7.06376	6.18725	6.45286	6.48284	6.24103
45	6.39162	6.64122	6.76	6.34109	6.36516	6.69206	6.35686	6.16987	5.93865	6.55771	6.45047	6.34704	6.22877	6.06193	6.1053	6.14	6.42453	6.285	6.2217	5.87586	5.77193	6.53113	3.33723	6.98453	6.41115	6.31564	6.55166	6.20455	6.27213	6.14516	5.91378	6.11408	5.97709	5.92842	5.62982	5.66418	5.54797	6.11719	5.73786	5.51702	5.31729	5.22797	6.73735	6.88343	7.04453	6.19354	6.44066	6.46789	6.24108
[truncated: 98 more columns]

## Sheet: Fitting and Results
competimer	Diluizione	replicati	3	4	5	6	7	8	9	10	11	12	13	14	15	16	17	18	19	20	21	22	23	24	25	26	27	28	29	30	31	32	33	34	35	36	37	38	39	40	41	42	43	44	45		FMAX	B	C
A	A	1	0.00907762	0.0538354	0.107972	0.236186	0.378693	0.537266	0.682461	0.855254	0.993436																																				1.583	3.535	-17.75
A	A	2	0.0188276	0.0556198	0.141585	0.26951	0.428043	0.5921	0.763276	0.947925	1.13573																																				2.073	4.126	-21.33
A	A	3	0.0248698	0.0835347	0.15746	0.278918	0.433429	0.629057	0.795742	0.942922	1.14536																																				2.014	4.095	-19.9
B	A	1	0.0174919	0.0788098	0.142619	0.221935	0.359618	0.516576	0.667129	0.831348	1.01244	1.16915	1.33819	1.46324																																	2.332	4.999	-17.51
B	A	2	0.000334315	0.0200953	0.0523313	0.0793321	0.133028	0.232133	0.285121	0.361262	0.443883	0.529513																																			0.9842	4.462	-18.79
B	A	3	0.0214308	0.0697845	0.162213	0.272837	0.416106	0.577356	0.758376																																						1.998	4.222	-20.55
C	A	1	0.0207462	0.0646951	0.11116	0.196698	0.323268	0.472302	0.618355	0.781327	0.981317																																				2.669	5.42	-24.34
C	A	2	0.0103428	0.0727135	0.114426	0.214005	0.327155	0.481698	0.626797	0.817927	0.975913																																				2.283	4.852	-12.75
C	A	3	0.0164882	0.0740421	0.130588	0.198813	0.341024	0.501091	0.664685	0.834646	1.02682																																				2.277	4.392	-0.3687
D	A	1	0.0105339	0.0576195	0.0736239	0.14524	0.227395	0.341968	0.440069	0.578495	0.74696																																				3.445	7.118	-30.29
D	A	2	0.0217002	0.0445371	0.0762679	0.126308	0.222541	0.337004	0.448579	0.586213	0.739918																																				2.133	5.039	-1.635
D	A	3	0.0099724	0.0576153	0.0948917	0.165787	0.237104	0.348494	0.456979	0.597208	0.753057																																				3.585	7.51	-30.81
E	A	1	0.0255312	0.0389723	0.0716829	0.106248	0.161306	0.231973	0.302925	0.410665	0.534886	0.655331	0.794726																																		1.49	2.505	13.28
E	A	2	0.0150722	0.0573067	0.0662509	0.112848	0.140387	0.225196	0.297318	0.395353	0.515865	0.639191	0.754801																																		0.9974	1.237	12.87
E	A	3	0.0210461	0.0589977	0.0803049	0.128911	0.162228	0.238489	0.299228	0.404198	0.530993	0.635133	0.772877																																		1.142	1.305	13.71
F	A	1	0.00047347	0.0405578	0.0565337	0.0710436	0.112653	0.139858	0.183982	0.23473	0.325289	0.408711	0.507798																																		0.5787	0.2349	13.09
F	A	2	0.00854868	0.0506507	0.0726017	0.0866855	0.140098	0.172928	0.206003	0.27793	0.356028	0.44665	0.555681																																		11.28	1.636	28.1
F	A	3	0.00205036	0.0556583	0.0675246	0.0907631	0.111318	0.171679	0.222851	0.280268	0.375252	0.469753	0.550482																																		0.624	0.348	12.76
G	A	1	0.00714885	0.0405608	0.0332714	0.0644192	0.0860199	0.0966062	0.107379	0.138144	0.19534	0.265463	0.324616	0.399736	0.463961	0.546445	0.644343	0.737641	0.853417	0.93364	1.03413	1.17082	1.24501	1.35104	1.47203	1.57767	1.64127	1.76241	1.85575	1.94867	2.04339	2.13908	2.23416	2.34461	2.37413	2.50752	2.58082	2.65703	2.71834	2.79263	2.86364	2.89884	2.9879	3.06605	3.05607		3.818	13.19	-87.99
G	A	2	0.0134266	0.0361586	0.0387142	0.0657973	0.0706997	0.0874469	0.120618	0.147254	0.196298	0.241628	0.315132	0.375138	0.450441	0.533604	0.612414	0.709374	0.808619	0.883191																											1.281	2.962	18.99
G	A	3	0.0225123	0.0320589	0.0408194	0.0672064	0.0909152	0.116647	0.136317	0.174869	0.222631	0.288814	0.347692	0.418745	0.485683	0.576	0.665309	0.753296	0.859276	0.953914																											1.733	4.176	19.73
A	B	1	0.0208273	0.0493852	0.102876	0.21124	0.373845	0.615341	0.863451	1.12445	1.37266																																				2.132	2.47	6.778
A	B	2	0.0172759	0.051482	0.0945284	0.213029	0.384611	0.599088	0.87607	1.12826	1.38671																																				2.242	2.633	6.249
A	B	3	0.0215549	0.0368255	0.0943495	0.207639	0.376105	0.614169	0.882949	1.15178	1.40526																																				2.189	2.501	6.339
B	B	1	0.00959111	0.0378001	0.100101	0.150617	0.29876	0.506042	0.716617	0.987133	1.24819																																				2.342	2.756	7.234
B	B	2	0.00938458	0.0462519	0.0980119	0.172078	0.307759	0.504306	0.744129	0.996292	1.22689																																				1.737	1.753	9.122
B	B	3	0.012249	0.0454375	0.105293	0.184074	0.329411	0.555599	0.781883	1.06558	1.3129																																				2.067	2.195	8.339
C	B	1	0.00953459	0.0375193	0.0774983	0.143318	0.249752	0.392978	0.592536	0.829549	1.079																																				2.226	2.491	9.501
C	B	2	0.0154452	0.0520172	0.0911242	0.161651	0.274976	0.43337	0.628514	0.893879	1.15003																																				1.952	1.747	10.62
C	B	3	0.0196402	0.0435653	0.0789581	0.148146	0.271341	0.444719	0.648186	0.890469	1.13263																																				2.028	2.392	8.686
D	B	1	0.0110386	0.0295535	0.0569548	0.0913899	0.163166	0.256004	0.392354	0.547216	0.760903																																				7.524	6.871	1.711
D	B	2	-0.00282052	0.0122933	0.0572668	0.0818878	0.15817	0.264128	0.385292	0.573091	0.775887																																				5.609	6.77	-19.95
D	B	3	0.00764142	0.0224927	0.0576919	0.108624	0.18054	0.287451	0.415276	0.587589	0.813282																																				12.23	9.218	-31.12
E	B	1	0.00482	0.0355874	0.0475139	0.0880027	0.113272	0.168782	0.230544	0.332355	0.464809	0.609416	0.784182																																		1.142	0.9995	13.7
E	B	2	0.0017347	0.0318561	0.0374679	0.0740931	0.119976	0.159189	0.237707	0.349315	0.496912	0.653312	0.830077																																		1.192	1.241	13.16
E	B	3	0.00759668	0.0371452	0.0456283	0.0904032	0.108779	0.170902	0.23608	0.342576	0.484348	0.622884	0.79913																																		1.223	1.286	13.57
F	B	1	0.00635322	0.0155188	0.0336006	0.0463586	0.0685413	0.108618	0.151868	0.195066	0.281142	0.357735	0.492193	0.594382	0.74533																																1.65	2.731	15.95
F	B	2	-0.00277901	0.0182447	0.0298883	0.0424084	0.0671432	0.100342	0.145649	0.199931	0.29309	0.383003	0.514334	0.620258	0.782811																																2.255	4.389	12.96
F	B	3	0.0134734	0.0135024	0.0307889	0.0490057	0.0733184	0.123571	0.156249	0.212463	0.300887	0.383163	0.517797	0.633491	0.792836																																2.428	3.796	16.06
G	B	1	0.000199674	0.0247531	0.0213715	0.0310685	0.0562876	0.0687365	0.0997288	0.124547	0.146146	0.204386	0.26216	0.324273	0.395119	0.49274	0.597589	0.714124	0.823916	0.909853																											1.075	1.35	19.34
G	B	2	0.00325198	0.0182892	0.0299119	0.0335248	0.0493275	0.0615692	0.0799197	0.113275	0.161473	0.215412	0.262767	0.33264	0.425966	0.530282	0.647868	0.767721	0.898947	1.013																											1.451	2.423	19.28
G	B	3	0.00612372	0.0179477	0.0293315	0.0417066	0.0660472	0.07806	0.113738	0.128791	0.181945	0.237782	0.298926	0.382183	0.479598	0.590624	0.714739	0.835115	0.981321	1.11071																											1.699	2.702	19.57
A	C	1	0.00312206	0.0121424	0.0298523	0.0780599	0.159376	0.291312	0.492425	0.789701	1.13809																																				3.44	2.672	9.59
A	C	2	0.00308677	0.00606707	0.0324859	0.0711998	0.136649	0.255044	0.426777	0.708114	1.01307																																				1.502	0.9801	10.94
A	C	3	0.00451074	0.0133301	0.0336282	0.0690117	0.14258	0.265664	0.447428	0.71123	1.01892	1.32336																																			2.134	1.825	10.49
B	C	1	0.000100042	0.00898535	0.0324241	0.0562557	0.115713	0.210315	0.352438	0.574603	0.868057	1.18216	1.45701	1.71033																																	2.19	1.857	11.18
B	C	2	-0.00279685	0.0118577	0.0203671	0.0556939	0.10864	0.207997	0.360042	0.585089	0.877395	1.19584	1.46386	1.73425																																	2.357	2.197	10.33
B	C	3	0.00302364	0.0117245	0.0317662	0.0580352	0.124947	0.220418	0.368046	0.602461	0.885955	1.2126	1.48055	1.71589																																	2.119	1.727	11.3
C	C	1	0.0045227	0.0103988	0.027752	0.0573418	0.104612	0.192625	0.301244	0.498048	0.750676	1.05313																																			2.163	1.683	12.22
C	C	2	0.0015794	0.0102975	0.0245461	0.047975	0.0859899	0.155479	0.253959	0.439358	0.668064	0.937094																																			1.477	1.186	11.96
C	C	3	0.00155885	0.00444883	0.0214272	0.0589644	0.0879739	0.168266	0.277247	0.44639	0.687104	0.964791																																			1.889	1.562	12.22
D	C	1	0.00303482	0.00302314	0.00861384	0.0234195	0.0499769	0.0965657	0.160704	0.248065	0.376132	0.56245	0.789157	1.05545	1.29507																																1.917	1.739	14.08
D	C	2	0.00734408	0.0160025	0.0215012	0.0362218	0.0654429	0.108626	0.171987	0.26403	0.413466	0.60582	0.826328	1.08022	1.33661																																2.24	2.281	13.61
D	C	3	0.0058249	0.0115552	0.025547	0.0372419	0.0661158	0.106002	0.177232	0.262635	0.407623	0.606496	0.83606	1.08713	1.33489																																1.958	1.82	13.9
E	C	1	0.000121444	0.0204463	0.0144089	0.0262963	0.0440855	0.0672978	0.096376	0.136979	0.215186	0.296093	0.425913	0.580068	0.771722	0.977035	1.17481	1.36901																													1.909	2.192	16.29
E	C	2	0.000147832	0.0144801	0.022835	0.0231923	0.0379339	0.0637726	0.0953801	0.144122	0.221305	0.306842	0.43481	0.595411	0.792915	0.992282	1.19869	1.38712																													1.953	2.295	16.07
E	C	3	0.00154529	0.00723176	0.00703942	0.0243413	0.0445434	0.0644353	0.0900222	0.126905	0.206082	0.290713	0.417353	0.567674	0.737434	0.945936	1.13573	1.31913																													1.902	2.371	16.09
F	C	1	0.00302831	-0.0027358	0.0143888	0.00316578	0.0151578	0.0354899	0.0472024	0.0762396	0.108016	0.154126	0.22874	0.292659	0.393883	0.540728	0.679759	0.82403	0.996785	1.13541																											1.688	2.635	18.14
F	C	2	-0.00126955	-0.00694204	0.00710118	0.00463863	0.0136234	0.0251554	0.0367237	0.062542	0.0996387	0.13941	0.204451	0.281762	0.387277	0.523379	0.666104	0.842514	1.00698	1.16354																											1.776	2.678	18.03
F	C	3	0.00296899	0.00863218	0.00282273	0.00319652	0.023362	0.0347812	0.0546926	0.0774448	0.114147	0.170442	0.229156	0.314145	0.418531	0.567261	0.716898	0.894125	1.07647	1.24814																											1.974	2.708	18.56
G	C	1	0.00014619	0.0117315	0.00286438	0.0061256	0.0152348	0.0182612	0.0329104	0.0475404	0.0562846	0.0851078	0.1136	0.154445	0.186291	0.260871	0.339046	0.419643	0.543264	0.658673	0.800209	0.932858	1.06893	1.21285																							1.913	3.466	21.76
G	C	2	0.000173887	0.0115783	0.00570692	-0.00525283	0.00946067	0.0125028	0.0212568	0.0328708	0.058649	0.0785275	0.103795	0.146968	0.184126	0.24622	0.317588	0.422654	0.518767	0.643861	0.786161	0.913974	1.05087	1.1898																							1.927	3.658	21.34
G	C	3	-0.00406937	0.00999418	0.00143375	0.00459314	0.0190729	0.0136195	0.0531897	0.047781	0.0591563	0.0900701	0.117931	0.160564	0.197283	0.258728	0.340556	0.433148	0.545132	0.665955	0.809409	0.944173	1.08225	1.21391																							1.699	2.727	22.38
A	D	1	0.000108582	-0.00858527	-3.3694e-05	0.0118081	0.0411378	0.0760052	0.15449	0.285227	0.520611	0.85182	1.22611	1.57024																																	2.137	1.382	12.62
A	D	2	0.00444576	-0.00129823	0.0101279	0.0161444	0.0424806	0.0685816	0.143903	0.27417	0.502739	0.817888	1.18738	1.54417																																	2.267	1.572	12.49
A	D	3	0.00299698	-0.00273775	1.06985e-05	0.0089232	0.0352423	0.0757899	0.142372	0.275427	0.492203	0.80705	1.17611	1.53529	1.82459																																2.313	1.601	12.59
B	D	1	-0.00277164	0.0144875	0.00857424	0.0173682	0.034808	0.0692157	0.0948875	0.186505	0.329597	0.567291	0.86199	1.19554	1.48573	1.74893	1.98506																														2.45	2.224	12.23
B	D	2	-0.00418267	0.00155422	0.00427425	0.0159317	0.0304981	0.0476686	0.0962783	0.181928	0.341714	0.572622	0.877251	1.22621	1.54636	1.81384	2.06312																														2.567	2.232	12.22
B	D	3	-0.0013216	0.00726241	0.00998965	0.0130715	0.0304778	0.0562111	0.104785	0.181811	0.327178	0.56078	0.859401	1.20217	1.51889	1.77432	2.01437																														2.434	2.051	12.76
C	D	1	0.00152972	0.00155095	0.00138412	0.00729136	0.0217873	0.035987	0.072937	0.123975	0.237442	0.410436	0.639859	0.950258	1.26902	1.56109																															2.231	1.827	14.01
C	D	2	0.00294089	0.0114555	0.00849021	0.0144011	0.0203742	0.0402592	0.0714697	0.14513	0.244048	0.399329	0.644712	0.945018	1.27631	1.57255																															2.185	1.65	14.44
C	D	3	0.00011136	0.0057858	0.00565711	0.0115658	0.0232117	0.0487193	0.0827339	0.136503	0.24667	0.421613	0.66103	0.960958	1.29167	1.59009																															2.267	1.775	14.26
D	D	1	0.0015171	-0.0069082	0.00704163	-0.00399773	0.00759193	0.0161002	0.0415525	0.0613004	0.11756	0.179256	0.297059	0.452374	0.666826	0.931449	1.20848	1.47357																													2.21	1.999	16.46
D	D	2
D	D	3	0.00570848	0.00295092	-0.00557027	0.00309161	0.00343742	0.0203398	0.0429124	0.0542461	0.0990766	0.177415	0.274997	0.426609	0.639674	0.894045	1.14945	1.42658																													2.35	2.339	16.09
E	D	1	0.00151589	0.00436195	-0.00418902	-0.00110561	0.00202076	0.0133248	0.0190624	0.0303886	0.0555775	0.0919014	0.130663	0.178466	0.276518	0.407648	0.575997	0.771992	0.989999	1.20019	1.41048																										2.003	2.252	19.05
E	D	2	-0.00127104	-0.00121704	-0.00413242	0.00174216	0.00490898	0.0161843	0.0135768	0.030506	0.0668525	0.0835487	0.133449	0.186808	0.28733	0.4319	0.60793	0.808542	1.04501	1.24853	1.48574																										2.23	2.56	18.6
E	D	3	0.00150794	0.00155585	-0.00412379	-0.00105841	0.00209622	0.0105588	0.0135267	0.0220644	0.0555519	0.0805815	0.122044	0.18086	0.270024	0.419908	0.559287	0.773448	0.987086	1.19012	1.39044																										1.966	2.322	18.71
F	D	1	0.000122985	0.00574161	3.8246e-05	-0.0136261	-0.00208369	0.00640946	0.00377447	0.0067277	0.0291376	0.031838	0.0510593	0.0708639	0.115531	0.173626	0.243428	0.337988	0.465757	0.613503	0.797695	0.990046																									2.919	3.959	21
F	D	2	-0.00125801	-0.00954613	-0.0152236	-0.0121369	-0.011739	-0.00327903	-0.00585078	-0.00290187	0.01107	0.0249667	0.0552696	0.0695087	0.108457	0.174678	0.235841	0.332744	0.473773	0.60402	0.784407	0.989604																									11.54	10.71	-6.041
F	D	3	-0.00126421	0.00432104	0.00142916	-0.00380715	-0.000651569	0.00502893	0.00244724	0.0109519	0.0249033	0.0359995	0.0634948	0.0804831	0.119406	0.182768	0.257775	0.34345	0.473163	0.622672	0.791644	0.996427																									5.626	6.571	17.68
G	D	1	0.00569509	0.00572063	-0.00275085	0.00312461	-0.00484433	-0.00190756	0.00662182	0.00124886	0.00135889	0.0152857	0.0150699	0.0237716	0.0433995	0.0681421	0.0933534	0.12377	0.167893	0.220642	0.301295	0.387377	0.490547	0.60158	0.760613																						19.99	15.87	-46.49
G	D	2	-0.00264665	0.00571219	0.00280741	0.000351407	-0.00475961	-0.00182559	-0.00717339	0.00135362	0.00426252	0.00704596	0.00961901	0.0155611	0.0351341	0.0570087	0.0738132	0.10693	0.150861	0.197821	0.264169	0.349771	0.435697	0.55164	0.679193																						9.871	13.32	-44.68
G	D	3	0.00564373	0.00845603	0.00278674	0.00310934	0.00629582	-0.00737377	0.00389374	0.00961994	0.0152975	0.0236225	0.0262043	0.0432112	0.0489191	0.0818549	0.112503	0.140059	0.189478	0.250239	0.327626	0.429704	0.52938	0.664492	0.822313																						12.6	10.98	17.6
A	E	1	-0.00133672	-0.00708287	-0.00719915	-0.00406202	-0.00376777	0.0107861	0.0195612	0.0514108	0.12946	0.253604	0.47576	0.777055	1.15645																																3.665	2.801	12.46
A	E	2	0.000113284	-0.0027419	-0.00286325	0.00320762	0.0122764	0.0153086	0.0241967	0.0621272	0.123223	0.233599	0.43076	0.733522	1.1																																1.884	1.178	14.92
A	E	3	0.00302349	-0.00570838	-0.00288783	0.00319426	0.00935557	0.00947038	0.0213553	0.0595811	0.124116	0.22955	0.425473	0.713101	1.07964	1.48612																															2.891	2.005	14.66
B	E	1	-0.00418363	0.00727528	-0.00426113	-0.00975084	-0.000898426	0.0020081	0.00778392	0.0306222	0.0675636	0.135668	0.251903	0.454545	0.734211	1.1047	1.45925	1.75025	2.01205																												2.457	1.877	15.37
B	E	2	0.00152872	0.00443028	-0.00713715	-0.00692955	0.00483986	0.00492304	0.0136754	0.0338233	0.0768647	0.148431	0.271239	0.469244	0.753103	1.09922	1.44944	1.71856	1.95845																												2.341	1.803	15.53
B	E	3	-0.00136078	0.0015755	-0.00429051	0.00749431	0.00776503	0.0136522	0.0137975	0.0312354	0.0746519	0.141056	0.253383	0.444419	0.716212	1.05947	1.40084	1.69517	1.93094																												2.33	1.787	15.7
C	E	1	0.000119463	0.000149671	0.00285611	0.000304621	-0.00499588	0.00924869	0.0206983	0.0349259	0.0603217	0.116631	0.203657	0.31955	0.525757	0.80765	1.16426	1.48907	1.76509																												2.145	1.364	17.36
C	E	2	0.00151843	0.00154597	-0.00137779	0.00454829	-0.000814016	0.0021159	0.00226626	0.0336641	0.0564249	0.0960833	0.183752	0.308882	0.510447	0.8079	1.14602	1.48927	1.78641																												2.355	1.69	16.95
C	E	3	0.00439098	0.00729633	-0.0013749	-0.00684531	-0.000791871	0.0193709	0.00808243	0.0254176	0.0483748	0.0998708	0.176834	0.297332	0.497774	0.780534	1.12718	1.48463	1.7639																												2.202	1.431	17.29
D	E	1	-0.00129241	-0.00686353	-0.00416548	-0.00671352	-0.0091601	-0.00345548	-0.00613538	-0.00600395	0.0108308	0.0303186	0.0551161	0.100013	0.175451	0.292422	0.454867	0.68994	0.986484	1.26951	1.54994																										2.249	1.942	19.16
D	E	2	-0.00130179	0.0100067	-0.00698733	-0.00109713	-0.00073441	-0.00628002	0.00517401	0.00250002	0.0194738	0.0306955	0.0585605	0.11229	0.188251	0.303059	0.469115	0.705246	0.983261	1.28439	1.56311																										2.386	2.112	19.12
D	E	3	0.00577511	-0.00269378	-0.0141227	-0.0167042	-0.016368	0.00077815	-0.00472381	-0.00739815	0.00970094	0.0295655	0.0463251	0.0919808	0.165773	0.27877	0.437696	0.661547	0.947499	1.24244	1.52896																										2.369	2.082	19.21
E	E	1	0.00150609	0.00433072	-0.00412956	-0.00663682	-0.00348593	-0.00058596	-0.000422857	-0.00860711	0.00259869	0.0137299	0.0190336	0.0359881	0.0610162	0.102281	0.155113	0.235419	0.351668	0.493328	0.696484	0.921755	1.14196	1.34746																							1.882	1.995	22.39
E	E	2	-0.00268687	0.000160428	-0.00554108	-0.00245767	-0.0104861	-0.00476863	0.00101249	-0.00158618	0.00970098	0.0041067	0.0235118	0.0293956	0.0574694	0.104675	0.15786	0.238655	0.349879	0.49218	0.699009	0.939263	1.16315	1.38913																							1.993	2.007	22.58
E	E	3	0.000104457	-0.00546081	-0.00557163	-0.00528143	-0.00772039	-0.00195891	-0.0130499	-0.00720018	0.00134442	0.00419865	0.0237716	0.03822	0.0495875	0.100036	0.153714	0.243717	0.367216	0.50791	0.707932	0.938773	1.18985	1.40623																							2.238	2.444	22.17
F	E	1	-0.00127691	0.00153748	-0.00689215	-0.0149198	-0.0117889	-0.0116664	-0.0087202	-0.0168646	-0.00844393	-0.00565546	-0.00306233	-0.00833708	0.00842364	0.0275252	0.0497909	0.0661814	0.11286	0.156914	0.234292	0.353119	0.466691	0.632598	0.810089	1.00081	1.19206																				2.304	3.391	24.5
F	E	2	0.00428764	0.00156523	-0.00134816	-0.00939504	-0.00900067	-0.00608789	-0.00311604	-0.0112718	-0.00558206	-0.00275642	-0.000132791	0.00859309	0.0115318	0.0419578	0.0616237	0.0781879	0.12797	0.189096	0.255719	0.375138	0.511582	0.667011	0.870397	1.0563	1.26508																				2.346	3.141	25.19
F	E	3	0.00711621	-0.00962781	0.00145337	-0.0122564	-0.0118501	-0.00890876	-0.00870089	-0.0141183	6.24905e-05	-0.00271994	-0.00287954	-0.00250032	0.00610856	0.0227149	0.0453734	0.067719	0.112299	0.157086	0.235545	0.333462	0.454108	0.608008	0.790444	0.983418	1.16563																				2.19	3.138	25.08
G	E	1	0.00288265	-0.00536008	2.6657e-05	-0.00794226	-0.013067	-0.0129122	-0.0127213	-0.0152897	-0.0151484	-0.0151293	-0.0235865	-0.00381969	-0.0119525	-0.00943657	-0.00372145	0.00451275	0.0236063	0.0401061	0.0566006	0.0922995	0.122667	0.174799	0.263247	0.33464	0.439581	0.561394	0.710648	0.868118																	10.5	12.51	-30.87
G	E	2	-0.0026613	0.000178489	-0.00551657	0.000354281	-0.00756466	-0.0018618	-0.00445483	-0.00145134	-0.00966228	-0.00407379	-0.0041977	-0.00104147	-0.00640736	0.00451671	0.00750702	0.0213771	0.0294735	0.0544764	0.0822509	0.109848	0.140409	0.198407	0.278899	0.353412	0.458787	0.575514	0.725368	0.866727	1.03535																4.612	7.667	23.13
G	E	3	0.00291147	0.00298432	-0.0055488	-0.00243298	-0.0160071	-0.0186666	-0.0100732	-0.0154641	-0.0181216	-0.00689563	-0.0154329	-0.00661738	-0.01203	-0.00941961	0.00482252	0.0159944	0.0297797	0.0325599	0.0661643	0.0940297	0.122051	0.172139	0.250489	0.325619	0.420637	0.543854	0.680835	0.828882	0.984738																3.253	5.847	26.91
A	F	1	0.00305433	-0.00576942	-0.00587189	-0.00860346	-0.00239477	0.00363855	-0.00805625	-0.0049912	0.0187471	0.0512366	0.101199	0.184161	0.355783	0.642316	1.02747	1.44177	1.8258																												2.508	1.518	17.29
A	F	2	0.000108848	-0.00883041	-0.00594317	-0.00868204	-0.0113733	0.000746231	-0.011087	-0.00191934	0.0131756	0.0401806	0.0999865	0.193324	0.370532	0.688158	1.10561	1.52835	1.93542																												2.707	1.649	16.87
A	F	3	0.00162753	-0.0135518	-0.0136561	-0.0134172	-0.0100632	-0.0069094	-0.00367563	-0.000467456	0.0271102	0.0423626	0.090986	0.195094	0.357021	0.652635	1.04671	1.47378	1.84516																												2.405	1.358	17.41
B	F	1	0.000106555	0.00015873	-0.0116359	-0.014302	-0.00522134	-0.0138886	-0.0107823	-0.00479725	-0.00185772	0.0126417	0.0326784	0.0882106	0.16966	0.317715	0.562804	0.880666	1.22735	1.52208																											2.045	1.521	18.14
B	F	2	-0.00878207	0.00312454	-0.00883397	-0.0144897	-0.00232028	-0.00517755	-0.00202303	-0.00186214	0.00414152	0.0278386	0.0601777	0.119673	0.220373	0.412297	0.69953	1.09004	1.49768	1.83787																											2.351	1.379	18.33
B	F	3	-0.00139844	-0.00135494	-0.00145437	-0.00721503	-0.00689098	0.00527638	-0.000561291	-0.006437	-0.00031425	0.0268096	0.0446545	0.0931188	0.171459	0.327564	0.559453	0.887399	1.25404	1.57309																											2.109	1.419	18.51
C	F	1	0.000108504	-0.00562498	-0.00572376	-0.0112136	-0.00508451	-0.0049566	-0.00476601	-0.0103752	0.00417639	0.0157058	0.0385668	0.056075	0.113798	0.199869	0.381924	0.624334	0.967734	1.32324	1.65294																										2.25	1.531	19.42
C	F	2	0.00889426	0.000138668	0.00297823	0.000327163	0.00357127	0.00663094	0.000930515	-0.00182222	0.0100113	0.012927	0.0420734	0.0628684	0.115691	0.212018	0.373208	0.619027	0.952385	1.32439	1.64963																										2.19	1.405	19.65
C	F	3	0.00308519	0.00908945	0.00301467	-0.00562874	-0.0112394	-0.00813402	-0.0139086	-0.00774548	-0.00165979	0.0102732	0.0339567	0.0581667	0.114961	0.216015	0.404087	0.66331	1.00862	1.36036	1.70037																										2.509	1.904	18.73
D	F	1	0.000101837	0.0030275	-0.0085266	-0.0139917	-0.00791205	-0.0192848	-0.00760533	-0.0275157	-0.0102224	-0.00447834	-0.0104436	0.00128402	0.024224	0.0524411	0.0981424	0.169278	0.297491	0.469026	0.706722	1.02186	1.33754	1.63802																							2.476	2.025	22.14
D	F	2	0.000108013	0.00016078	-0.0144685	-0.0170915	-0.0138363	-0.010789	-0.013515	-0.0191271	-0.0190504	-0.0131936	-0.00755482	-0.00141368	0.0219649	0.0507146	0.0943158	0.172453	0.28801	0.459075	0.702985	1.002	1.2986	1.61769																							2.789	2.515	21.54
D	F	3	9.79645e-05	-0.00280323	-0.00289584	-0.0144464	-0.00819736	-0.00807195	-0.00493605	-0.0136283	-0.00464813	0.00129792	0.00409142	0.0103407	0.0193167	0.0545516	0.0930344	0.166697	0.269624	0.434938	0.683199	0.97574	1.30431	1.6202																							2.46	1.903	22.53
E	F	1	0.00152987	0.00159869	-0.012736	-0.00391452	-0.00925366	-0.00341866	-0.014618	-0.0201277	-6.8624e-05	-0.00574054	-0.00589648	-0.00556119	0.000259063	0.0170868	0.0257125	0.0425615	0.0819493	0.112915	0.189434	0.308537	0.442125	0.620952	0.857399	1.12454	1.37795																				2.481	2.476	25.78
E	F	2	-0.00276418	-0.00271413	-0.011465	-0.00540376	-0.00791095	-0.0135547	-0.0162306	-0.0189142	-0.00724078	-0.0187664	-0.0102374	-0.0127514	-0.0125895	0.00741955	0.0220533	0.0421647	0.0764566	0.110917	0.182835	0.289222	0.430537	0.614748	0.854437	1.10205	1.35599																				2.319	2.361	25.65
E	F	3	0.000119672	0.000173183	-0.00579784	-0.00844768	-0.0110082	-0.00499244	-0.00773528	-0.00458031	-0.00447225	-0.00442958	-0.00163476	0.00169801	-0.00695111	0.0104745	0.0194873	0.0311535	0.06317	0.0835916	0.156842	0.229914	0.350218	0.496573	0.713997	0.93961	1.19509																				2.484	2.606	26.24
F	F	1	0.0086092	-0.00547854	-0.00843651	-0.0138049	-0.00490356	-0.0104472	-0.0187411	-0.010031	-0.0184285	-0.00987417	-0.0185307	-0.0266712	-0.0208122	-0.012507	-0.0151682	-0.00672646	0.00149176	0.0099218	0.0381546	0.0718926	0.111433	0.156267	0.241053	0.356663	0.475382	0.648277	0.849353	1.06162	1.27319	1.49228															2.86	3.867	28.08
F	F	2	-0.00562409	-0.00268741	-0.0114216	-0.0139978	-0.0135974	-0.0048241	-0.0189831	-0.021663	-0.0157696	-0.0157309	-0.0187525	-0.0241049	-0.0296674	-0.0125966	-0.0123672	-0.0124025	0.00751809	0.0103866	0.0333513	0.0705694	0.102129	0.159244	0.248183	0.342412	0.468567	0.649629	0.841924	1.05418	1.24559	1.45031															2.385	3.23	28.74
F	F	3	0.00303509	0.00600887	5.7735e-05	0.000349879	-0.00510209	-0.00789322	-0.0135418	-0.0191816	-0.0161319	-0.0131772	-0.00745839	-0.0217009	-0.0214998	-0.0099904	-0.0097562	-0.00977588	0.0104993	0.00760506	0.0339202	0.0571903	0.0922875	0.132923	0.205904	0.287278	0.406947	0.558987	0.713681	0.918033	1.10126	1.29485															2.463	3.703	28.52
G	F	1	0.000127341	-0.00544786	-0.00843177	-0.0165684	-0.021783	-0.0131393	-0.0185875	-0.0183758	-0.0295312	-0.0153535	-0.0183202	-0.029212	-0.0290028	-0.0291935	-0.0289488	-0.0261411	-0.0178443	-0.0178201	-0.00649293	-0.000931565	0.0104377	0.0243305	0.0610544	0.0832615	0.119837	0.18478	0.238162	0.328266	0.440626	0.562503	0.720195	0.89263													17.43	14.18	-36.87
G	F	2	0.00155889	-0.00410514	0.00147166	-0.00105994	-0.0149678	-0.0205562	-0.0146046	-0.0143924	-0.0228388	-0.0199508	-0.0229549	-0.0196556	-0.0280608	-0.0167702	-0.0193782	-0.0222683	-0.0224552	-0.00803855	-0.00226286	-0.00232896	0.00923621	0.0234094	0.0549494	0.0689391	0.103217	0.14324	0.206042	0.280163	0.382633	0.49176	0.643022	0.806248													31.45	16.13	-35
G	F	3	0.00157705	-0.00418162	-0.00723448	-0.0127399	-0.0123222	-0.0150924	-0.017797	-0.0292355	-0.0290904	-0.020318	-0.020454	-0.022948	-0.0314952	-0.0229405	-0.0285069	-0.0226808	-0.0141	-0.0227958	-0.0169079	-0.00235265	0.00942672	0.00927462	0.0384573	0.0732101	0.0935397	0.137264	0.192475	0.273821	0.36648	0.489269	0.616936	0.780128													16.54	13.89	-31.59
A	G	1	0.000135412	-0.0122264	-0.015454	-0.018257	-0.0147355	-0.0239164	-0.0330228	-0.0359322	-0.0357948	-0.0388935	-0.0297493	-0.0450047	-0.0449538	-0.0423176	-0.0300472	-0.0211904	0.0124273	0.0463292	0.130138	0.28231	0.540612	0.932135	1.46122	1.95476	2.35257																				2.959	1.439	24.84
A	G	2	-0.00148864	0.0048948	-0.0110419	-0.00763656	-0.0105013	-0.0103884	-0.0102031	-0.0195861	-0.0194578	-0.0162515	-0.0163628	-0.0223917	-0.0349465	-0.0160037	-0.0126568	-0.0126715	0.0062524	0.0380369	0.0729852	0.164982	0.326993	0.606099	1.03807	1.53586	1.98967																				2.684	1.286	25.73
A	G	3	0.0049665	-0.00150289	-0.00807069	-0.0143412	-0.00752796	-0.0106714	-0.0170027	-0.0201029	-0.0167367	-0.0166885	-0.016802	-0.0262535	-0.0358465	-0.0131979	-0.016273	-0.0195432	0.00313377	0.0226554	0.0585344	0.14963	0.296186	0.553044	0.963271	1.454	1.89963	2.24157																			2.692	1.373	25.7
B	G	1	-0.00295236	0.00323056	-0.0122186	-0.0027295	-0.00849822	-0.00530274	-0.0204515	-0.0172061	-0.0262939	-0.0170762	-0.0264741	-0.0292556	-0.0384581	-0.0265747	-0.0175778	-0.0181379	-0.00967481	-0.00403652	0.0385597	0.087195	0.182086	0.359526	0.647921	1.04946	1.50065	1.90301																			2.678	1.551	26.27
B	G	2	-0.0014646	0.00483529	-0.00778172	-0.0106679	-0.0134564	-0.00706879	-0.0194148	-0.00983749	-0.0254045	-0.0159526	-0.0192027	-0.0251192	-0.0312198	-0.031376	-0.0186307	-0.0123528	-0.0156703	-0.00626425	0.00625374	0.0437314	0.100025	0.212341	0.403148	0.68435	1.08835	1.54625																			10.75	5.777	-17
B	G	3	9.0166e-05	0.00974407	-0.00316322	-0.00292519	-0.015465	-0.00249718	-0.0119526	-0.00859649	-0.0149198	-0.0148681	-0.0214074	-0.0275115	-0.0337758	-0.0274929	-0.0241026	-0.0112256	-0.0178084	0.00149872	0.014399	0.0367824	0.0946091	0.18098	0.363962	0.652563	1.05081	1.48485																			8.427	5.175	-14.96
C	G	1	0.000102317	0.00622906	0.00915609	0.00033243	-0.00537593	-0.00828887	-0.00807719	-0.00789083	-0.0168922	-0.00775766	-0.0109497	-0.0288737	-0.0226878	-0.0290638	-0.0291335	-0.0234177	-0.0148908	-0.0275144	-0.00970304	0.00196841	0.0198574	0.0648261	0.134301	0.239875	0.430797	0.713275	1.09302	1.51825	1.88165	2.17744															2.667	1.643	29.34
C	G	2	0.00319813	-0.00606834	4.40515e-05	-0.0058912	-0.0117534	-0.00852203	-0.0238577	-0.0205806	-0.0204479	-0.0204231	-0.0174097	-0.0325895	-0.0386557	-0.0387695	-0.0292502	-0.0354964	-0.0262897	-0.023135	-0.010666	-0.00142476	0.0172337	0.0635669	0.131716	0.239781	0.441123	0.742115	1.13617	1.55805	1.91992	2.20956															2.674	1.627	29.22
C	G	3	0.00486633	0.0112619	-0.00155169	-0.00127601	-0.00410819	-0.00717279	-0.0165271	-0.00999178	-0.000304363	-0.00982175	-0.0162877	-0.0286701	-0.0253103	-0.019067	-0.0188819	-0.0188934	-0.0126534	-0.0126142	-0.0093883	0.00650093	0.0320388	0.0668562	0.140015	0.241419	0.447997	0.743952	1.13527	1.55195	1.92946	2.23611															2.779	1.735	29.16
D	G	1	0.00762369	-0.00737451	-0.019517	-0.0102152	-0.00988297	-0.0157806	-0.0156093	-0.027483	-0.0183368	-0.0183122	-0.0184329	-0.0301707	-0.0239997	-0.0332499	-0.0301383	-0.0303112	-0.0397331	-0.0429812	-0.0312282	-0.022563	-0.0228848	-0.0143622	-0.0026526	0.0148527	0.0444742	0.0922271	0.181987	0.283718	0.472684	0.741156	1.06898	1.41548	1.72239	1.99321											4.707	5.171	-16.18
D	G	2	0.00624957	-0.00291938	-0.00917009	-0.0181417	-0.0054814	-0.0115118	-0.0113182	-0.0296258	-0.0202799	-0.0171511	-0.0265049	-0.0261404	-0.0228931	-0.0291826	-0.0351635	-0.0258992	-0.0260289	-0.0321341	-0.0321012	-0.0197822	-0.01971	-0.0229362	-0.0106216	0.00757547	0.0288603	0.0654935	0.12337	0.215049	0.355763	0.57134	0.847695	1.17386	1.49978	1.74865											4.673	5.275	-15.47
D	G	3	-0.00147831	-0.00458803	-0.00467517	-0.0107251	-0.013556	-0.0134423	-0.0132596	-0.0193973	-0.0256212	-0.0192545	-0.0319711	-0.0347962	-0.0283169	-0.0347656	-0.0314274	-0.0282583	-0.0283947	-0.0378032	-0.0251133	-0.0251459	-0.0124173	-0.0220205	0.00326744	0.00301702	0.0249085	0.0594272	0.12529	0.216313	0.360786	0.575614	0.859121	1.19681	1.50259	1.7927											4.807	5.283	-15.31
E	G	1	-0.00586304	-0.00579623	-0.0118919	-0.0115955	-0.0172011	-0.0230546	-0.0198632	-0.0286324	-0.0225382	-0.0224942	-0.0316159	-0.0342281	-0.0400449	-0.0312202	-0.04001	-0.0460449	-0.0432561	-0.0432638	-0.0313694	-0.0465752	-0.0376859	-0.0410348	-0.0382582	-0.0327228	-0.0300532	-0.0273172	-0.0127694	0.00474038	0.0339586	0.0905931	0.146624	0.235899	0.370019	0.56715	0.797284	1.07825	1.34182	1.57232							4.534	5.968	-14.54
E	G	2	-0.00446208	0.00172175	-0.00757212	-0.0103199	-0.019123	-0.0128673	-0.0248991	-0.0246849	-0.0123308	-0.0214595	-0.0154553	-0.0211864	-0.0301946	-0.0211446	-0.0209065	-0.0239645	-0.024112	-0.0332222	-0.0300947	-0.027046	-0.0269232	-0.0331317	-0.0207881	-0.0148191	-0.0178773	-0.0116923	0.00657312	0.0277882	0.0394914	0.0853029	0.142712	0.212539	0.3251	0.489775	0.700368	0.956741	1.21983	1.47981							7.341	7.758	-17.48
E	G	3	0.0016773	0.00172266	-0.0108974	-0.00436363	-0.0103042	-0.00706633	-0.0162746	-0.012966	-0.00344708	-0.0128033	-0.0191869	-0.0219831	-0.0249544	-0.0188134	-0.0154776	-0.0248908	-0.0187374	-0.0280752	-0.0248832	-0.024912	-0.0122246	-0.018574	-0.0153766	-0.0123578	-0.00919869	-0.00601438	0.00333487	0.0219978	0.0372786	0.0811818	0.137097	0.202579	0.302455	0.452626	0.656127	0.903453	1.17644	1.44308							2.307	2.029	39.13
F	G	1	0.00160819	-0.00428175	-0.00440781	-0.0130201	-0.0185761	-0.0154612	-0.0152542	-0.0269572	-0.0238462	-0.0148622	-0.023947	-0.0354669	-0.0322804	-0.0264933	-0.0351976	-0.0381916	-0.0264307	-0.0442614	-0.0412602	-0.0293738	-0.0352841	-0.0414333	-0.0295559	-0.0268782	-0.0359894	-0.0331197	-0.0274127	-0.0307534	-0.0253267	-0.00153484	-0.00210466	0.0154293	0.026884	0.0650835	0.115162	0.165127	0.263108	0.381966	0.533076	0.723952	0.940967	1.17066	1.37318		2.201	2.556	43.19
F	G	2	-0.00292398	-0.0150302	0.00309772	-0.014831	-0.0114225	-0.00519901	-0.017168	-0.0230723	-0.0168506	-0.0259447	-0.0199785	-0.0317889	-0.0315918	-0.0317481	-0.0284601	-0.0284564	-0.025551	-0.0376554	-0.0345405	-0.0284633	-0.034421	-0.0283903	-0.0130606	-0.0162357	-0.0131267	-0.000808689	0.0022214	0.0204426	0.0445496	0.0721992	0.123725	0.187669	0.260589	0.370026	0.515956	0.679998	0.856646	1.01183	1.16604	1.3277					1.874	2.972	38.16
F	G	3	-0.00299439	-0.00916926	-0.00305726	-0.0245398	-0.0148269	-0.0146953	-0.0269456	-0.020517	-0.0266328	-0.0328133	-0.0235896	-0.0263135	-0.0323566	-0.0293978	-0.0354222	-0.0385368	-0.0355558	-0.0385921	-0.0385205	-0.0260485	-0.0321431	-0.0384817	-0.0258896	-0.0353966	-0.0384601	-0.0227309	-0.03211	-0.0259341	-0.0262212	-0.0166576	-0.0138292	0.0110801	0.0233321	0.0355453	0.0820168	0.131505	0.199938	0.312079	0.429945	0.6049	0.797994	1.01362	1.25388		9.804	9.863	-15.91
G	G	1
G	G	2
G	G	3
[truncated: 16 more columns]

## Sheet: Legend
percentage competimer_dilution_replicate
	percentage of competimer
A	0
B	5
C	10
D	20
E	30
F	40
G	50
	dilution
A	64
B	16
C	4
D	1
E	0.25
F	0.0625
G	NTC
	replicates
1
2
3
